# Supplementary material
Source: PubMed Central journal article supplement (PMC7484970)

In the format provided by the authors and unedited.

# Genetic studies of urinary metabolites illuminate mechanisms of detoxification and excretion in humans

Pascal Schlosser <sup>1,16</sup>, Yong Li <sup>1,16</sup>, Peggy Sekula <sup>1,16</sup>, Johannes Raffler<sup>2</sup>,  
Franziska Grundner-Culemann <sup>1</sup>, Maik Pietzner<sup>3,4</sup>, Yurong Cheng<sup>1</sup>, Matthias Wuttke <sup>1,5</sup>,  
Inga Steinbrenner<sup>1</sup>, Ulla T. Schultheiss<sup>1,5</sup>, Fruzsina Kotsis<sup>1,5</sup>, Tim Kacprowski <sup>4,6,7</sup>, Lukas Forer<sup>8</sup>,  
Birgit Hausknecht<sup>9</sup>, Arif B. Ekici <sup>10</sup>, Matthias Nauck<sup>3,4</sup>, Uwe Völker <sup>4,6</sup>, GCKD Investigators<sup>11</sup>,  
Gerd Walz <sup>5</sup>, Peter J. Oefner<sup>12</sup>, Florian Kronenberg <sup>8</sup>, Robert P. Mohny <sup>13</sup>, Michael Köttgen<sup>5</sup>,  
Karsten Suhre <sup>14</sup>, Kai-Uwe Eckardt<sup>9,15</sup>, Gabi Kastenmüller <sup>2</sup> and Anna Köttgen <sup>1\*</sup>

<sup>1</sup>Institute of Genetic Epidemiology, Faculty of Medicine and Medical Center, University of Freiburg, Freiburg, Germany. <sup>2</sup>Institute of Bioinformatics and Systems Biology, Helmholtz Zentrum München, German Research Center for Environmental Health, Neuherberg, Germany. <sup>3</sup>Institute of Clinical Chemistry and Laboratory Medicine, University Medicine Greifswald, Greifswald, Germany. <sup>4</sup>German Center for Cardiovascular Research (DZHK e.V.), partner site Greifswald, Greifswald, Germany. <sup>5</sup>Department of Medicine IV: Nephrology and Primary Care, Faculty of Medicine and Medical Center, University of Freiburg, Freiburg, Germany. <sup>6</sup>Department of Functional Genomics, Interfaculty Institute for Genetics and Functional Genomics, University Medicine Greifswald, Greifswald, Germany. <sup>7</sup>Research Group on Computational Systems Medicine, Chair of Experimental Bioinformatics, TUM School of Life Sciences Weihenstephan, Technical University of Munich, Freising, Germany. <sup>8</sup>Department of Genetics and Pharmacology, Institute of Genetic Epidemiology, Medical University of Innsbruck, Innsbruck, Austria. <sup>9</sup>Department of Nephrology and Hypertension, University Hospital Erlangen, Friedrich-Alexander-Universität Erlangen-Nürnberg, Erlangen, Germany. <sup>10</sup>Institute of Human Genetics, Friedrich-Alexander-Universität Erlangen-Nürnberg, Erlangen, Germany. <sup>11</sup>A list of members and affiliations appears in the Supplementary Note. <sup>12</sup>Institute of Functional Genomics, University of Regensburg, Regensburg, Germany. <sup>13</sup>Metabolon Inc., Durham, NC, USA. <sup>14</sup>Department of Physiology and Biophysics, Weill Cornell Medicine-Qatar, Education City, Doha, Qatar. <sup>15</sup>Department of Nephrology and Medical Intensive Care, Charité-Universitätsmedizin Berlin, Berlin, Germany. <sup>16</sup>These authors contributed equally: Pascal Schlosser, Yong Li, Peggy Sekula. \*e-mail: [anna.koettgen@uniklinik-freiburg.de](mailto:anna.koettgen@uniklinik-freiburg.de)

## **Genetic Studies of Urinary Metabolites Illuminate Mechanisms of Detoxification and Excretion in Humans**

Pascal Schlosser\*, Yong Li\*, Peggy Sekula\*, Johannes Raffler, Franziska Grundner-Culemann, Maik Pietzner, Yurong Cheng, Matthias Wuttke, Inga Steinbrenner, Ulla T. Schultheiss, Fruzsina Kotsis, Tim Kacprowski, Lukas Forer, Birgit Hausknecht, Arif B. Ekici, Matthias Nauck, Uwe Völker, GCKD Investigators\*\*, Gerd Walz, Peter J. Oefner, Florian Kronenberg, Robert P. Mohny, Michael Köttgen, Karsten Suhre, Kai-Uwe Eckardt, Gabi Kastenmüller, Anna Köttgen

\* these authors contributed equally

\*\* a list of the GCKD Investigators is included in Supplementary Information

### **SUPPLEMENTARY INFORMATION**

## Table of Contents

|                                                                                                                                       |               |
|---------------------------------------------------------------------------------------------------------------------------------------|---------------|
| <b>SUPPLEMENTARY NOTE.....</b>                                                                                                        | <b>3</b>      |
| <i>INCORPORATION OF EXISTING BIOLOGICAL KNOWLEDGE INTO CAUSAL GENE ASSIGNMENT.....</i>                                                | <i>3</i>      |
| <i>METABOLITE CLUSTERS PROVIDE BIOLOGICAL CONTEXT FOR YET UNNAMED METABOLITES.....</i>                                                | <i>5</i>      |
| <i>METABOLITE RATIOS CAPTURE INSIGHTS INTO PHYSIOLOGY AND PHARMACOGENETICS .....</i>                                                  | <i>7</i>      |
| <i>ASSOCIATION BETWEEN NAT8-ASSOCIATED METABOLITES AND CKD PROGRESSION AND COMPLICATIONS.....</i>                                     | <i>8</i>      |
| <i>EXTENDED ACKNOWLEDGEMENTS.....</i>                                                                                                 | <i>9</i>      |
| <br><i>SUPPLEMENTARY METHODS .....</i>                                                                                                | <br><i>10</i> |
| <br><b>REFERENCES: .....</b>                                                                                                          | <br><b>15</b> |
| <br><b>SUPPLEMENTARY FIGURE 1: REGIONAL ASSOCIATION PLOTS FOR MQTLs IDENTIFIED IN MGWAS OF URINARY METABOLITE CONCENTRATIONS.....</b> | <br><b>16</b> |

## Supplementary Note

### *Incorporation of existing biological knowledge into causal gene assignment*

The workflow to assign potentially causal genes in GWAS loci was agnostic with respect to existing biological and biochemical knowledge. Upon evaluation after the gene had been assigned, the great majority of automatically assigned genes was also supported by existing biochemical knowledge and experimental studies. There were a few instances, however, in which incorporation of existing biochemical and biological knowledge into the causal gene assignment process would have supported another gene in the locus (see Table). At these loci, it may be that the automated gene assignment that was agnostic with respect to existing biological and biochemical knowledge did not prioritize the correct causal gene. As unbiased databases to facilitate automated gene assignment become more and more complete, for example through the generation of gene expression data in additional tissues and cell types, the assignment of the most likely gene in a given region may be subject to change. Regardless, sensitivity analyses repeating all enrichment analyses with the use of these genes instead of the automatically assigned ones at these eight loci yielded the same or almost identical enriched pathways, tissues, and cell types (data not shown).

| Automatically assigned gene in locus (gene score) | Biologically supported gene in locus (gene score) | Associated metabolite(s) or known module(s)                                                  | Background on biologically supported gene                                                                                                        |
|---------------------------------------------------|---------------------------------------------------|----------------------------------------------------------------------------------------------|--------------------------------------------------------------------------------------------------------------------------------------------------|
| <i>CASP9</i> (hremc)                              | <i>AGMAT</i> (hrem)                               | 4-guanidinobutanoate, beta-guanidinopropanoate                                               | The enzyme encoded by <i>AGMAT</i> , agmatinase, metabolizes N-(4-aminobutyl)guanidine [ <a href="http://www.hmdb.ca/">http://www.hmdb.ca/</a> ] |
| <i>LRP8</i> (hep)                                 | <i>CPT2</i> (h)                                   | methylsuccinoylcarnitine                                                                     | Succinoylcarnitine is a fatty acid. <i>CPT2</i> encodes carnitine palmitoyltransferase II, which acts on fatty acids.                            |
| <i>ZKSCAN5</i> (he)                               | <i>CYP3A7</i> (NA)                                | 16a-hydroxy DHEA 3-sulfate, andro steroid monosulfate C19H28O6S (1)*, tauro-beta-muricholate | The enzyme encoded by <i>CYP3A7</i> hydroxylates dehydroepiandrosterone 3-sulphate.                                                              |
| <i>PPP2R4</i> (hrem)                              | <i>CRAT</i> (hre)                                 | 2-methylmalonylcarnitine                                                                     | <i>CRAT</i> encodes carnitine O-acetyltransferase. This enzyme                                                                                   |



|                                           |                          |                                                  |                                                                                                                                                                                                                                                                                                                                                                                                         |
|-------------------------------------------|--------------------------|--------------------------------------------------|---------------------------------------------------------------------------------------------------------------------------------------------------------------------------------------------------------------------------------------------------------------------------------------------------------------------------------------------------------------------------------------------------------|
|                                           |                          | (C4-DC)                                          | converts short- and medium-chain acyl-CoAs, to which 2-methylmalonylcarnitine belongs.                                                                                                                                                                                                                                                                                                                  |
| <i>TRIM48</i> (NA)                        | <i>FOLH1</i> (NA)        | N-acetyl-aspartyl-glutamate (NAAG)               | <i>FOLH1</i> encodes folate hydrolase 1, which metabolizes NAAG [PMID: 9622670]. The index SNP rs61898064 that gives rise to the automated assignment of <i>TRIM48</i> is in LD ( $r^2=0.798$ ) with another mQTL (rs55728336). This other mQTL is associated with NAAG, and its index SNP was automatically assigned to <i>FOLH1</i> . The two signals were not merged because the $r^2$ was not >0.8. |
| <i>NUPR1</i> (he),<br><i>CCDC101</i> (he) | <i>SULT1A2</i> (he)      | 3-hydroxyindolin-2-one sulfate, furaneol sulfate | The enzyme encoded by <i>SULT1A2</i> catalyzes the sulfate conjugation of a wide variety of molecules.                                                                                                                                                                                                                                                                                                  |
| <i>TYMS</i> (ohre)                        | <i>ENOSF1</i> (ohe)      | ribonate                                         | The enzyme encoded by <i>ENOSF1</i> plays a role in the catabolism of the deoxy sugar L-fucose. Ribonate is a sugar acid.                                                                                                                                                                                                                                                                               |
| <i>CABP5</i> (e)                          | <i>SULT2A1</i> (e)       | androstenediol (3beta,17beta) disulfate (1)      | The encoded enzyme, dehydroepiandrosterone sulfotransferase, catalyzes the sulfation of steroids and bile acids including DHEA, of which androstenediol is a direct metabolite.                                                                                                                                                                                                                         |
| <i>BTN3A1</i> (hem)                       | <i>SLC17A1/A3/A4</i> (h) | ME41                                             | The metabolites assigned to this module belong to a substrate call transported by the SLC17A transporter family. The individually significant metabolite in the cluster, indolelactate, is assigned to <i>SLC17A1/A3/A4</i> .                                                                                                                                                                           |
| <i>RAB11FIP5</i> (h)                      | <i>NAT8</i> (NA)         | ME160, ME161, ME166                              | All known metabolites assigned to the listed clusters are N-acetylated compounds. N-acetylation is a key function of the enzyme encoded by <i>NAT8</i> .                                                                                                                                                                                                                                                |

### *Metabolite clusters provide biological context for yet unnamed metabolites*

Metabolites are intermediates of homeostatic reactions and as such inter-connected beyond pair-wise relationships. Groups of correlated metabolites (“modules”) may reflect shared biochemical pathways or co-regulation. We used a weighted gene co-expression analysis-based approach, to construct 212 metabolite modules (Methods, **Extended Data Figure 6A**). GWAS of the modules’ first principal component, the eigenmetabolite, identified 46 significant ( $P < 2.4 \times 10^{-10}$  [ $5 \times 10^{-8}/212$ ]) and replicated associations between genetic variants and 38 unique metabolite modules (**Extended Data Figure 7, Supplementary Table 12**). In three instances, the gene scored as most likely to be causal was not part of the 90 genes identified in the single metabolite screen. One of them, *CPT2*, is also supported by biological evidence but did not receive the highest score within the locus in the single metabolite screen (see above). At the other four genes, biological evidence points toward a different gene than the one automatically assigned (see above, **Supplementary Table 12 + 15**).

Eigenmetabolites that showed particularly strong genetic associations originated from a module of five unknown metabolites (missense rs2147896 in *PYROXD2*,  $P = 2.5 \times 10^{-917}$ ) and a module composed of N2-acetyllysine, N-alpha-acetylornithine, X-12124, X-12125, and X-15666 (missense rs13538 in *NAT8*,  $P = 4.3 \times 10^{-635}$ ; **Extended Data Figure 6B, C**). Such associations are suggestive of a common function of the enzyme on metabolites in the module, implicating the unknown molecules in the *NAT8*-associated module as additional N-acetylated compounds or their precursors. Similarly, a module of the known vitamin E (tocopherol)-related metabolites also contained the two unknowns X-13689 and X-24359 (**Supplementary Table 12**) and was associated with rs55744319, which is in high LD with a missense variant in *CYP4F2*, encoding p.Val433Met. This variant has previously been identified in response to vitamin E supplementation<sup>1</sup>, vitamin E levels<sup>2</sup>, and warfarin

maintenance dose<sup>2,3</sup>. Investigation of the unknown metabolites based on their mass, retention time, spectral information and genetic evidence nominated the unknown molecules as structurally related to Vitamin E, with the glucuronide of alpha-CMBHC as a candidate for X-13689. We experimentally verified this prediction through the examination and comparison of retention times from ion chromatograms and the locations and intensities of the MS/MS fragmentation spectra between a standard of the glucuronide of alpha-CMBHC and X-13689 (**Extended Data Figure 7**). Thus, knowledge of an unknown's module membership and its genetic association can provide information beyond mass and retention time by restricting the search space of their possible identity for experimental verification.

While there were no genetic associations with modules that did not contain at least one metabolite also identified by mGWAS, screening of eigenmetabolites provided the important advantage of permitting a hypothesis-generating screen of higher order genetic associations, whereas already the assessment of all pair-wise metabolite ratios would have accumulated to 686,206 GWAS. Furthermore, 35 of 46 eigenmetabolite associations implicate additional metabolites that were not identified in mGWAS after correction for multiple testing (**Extended Data Figure 7, Supplementary Table 12**). We have made our software, used for identification of eigenmetabolites, publicly available (<https://github.com/genepi-freiburg/Netboost>), which may be of particular interest for emerging large-scale integrative Omics efforts.

### *Metabolite ratios capture insights into physiology and pharmacogenetics*

The renal tubular amino acid exchanger *SLC7A9* is known to exchange dibasic amino acids such as lysine from urine against intracellular neutral amino acids in model systems<sup>4,5</sup>. We therefore screened all pair-wise metabolite ratios for this known exchanger. A *P*-gain threshold of 6,728,320 ( $672,832 \times 10$ ) was used to identify ratios that contributed information beyond their individual components, where 672,832 represents the number of tested ratios ( $1172 \times 1171 / 2$ ) after exclusion of ratios with less than 300 measurements. The index SNP rs12460876, associated with differential *SLC7A9* expression (**Supplementary Table 3**), was related to 83 informative metabolite ratios (*P*-gain >6.7e6, **Extended Data Figure 5**). Of these, all ratios that contained lysine also contained neutral amino acids such as phenylalanine, threonine, glutamine, or alanine, reflecting its known physiological function, amino acid exchange at the apical membrane of tubular epithelial cells<sup>4</sup>. In this screen, 5-hydroxy-lysine and the unknown metabolite X-24736 emerged as novel candidate substrates of this exchanger (**Extended Data Figure 5**). Based on spectral information, mass and retention time, X-24736 is likely an arginine-containing metabolite, consistent with the uptake of dibasic amino acids from urine. The identification of novel candidate substrates of known transport proteins is of high interest for pharmaceutical research, both with respect to a target's therapeutic potential but also to anticipate potential side effects.

### *Association between NAT8-associated metabolites and CKD progression and complications*

Given the high and near-exclusive expression of *NAT8* in kidney, we tested whether the 30 *NAT8*-associated metabolites may carry information about the risk of CKD progression and CKD-related endpoints complementary to eGFR, for example by capturing detoxification capacity (**Supplementary Methods**). N-acetylation is an important reaction in a major route of detoxification, the generation of water-soluble mercapturic acids<sup>6</sup>. Spearman correlation coefficients of the 30 metabolites with eGFR, the main measure of kidney function in clinical practice, were weak (range -0.17 to 0.24). We assessed the association of the *NAT8*-associated metabolites with incident end-stage kidney disease (ESKD, n=61), incident major cardiovascular events (MACE, n=143) and all-cause mortality (n=129; Methods). In comparison to a model with clinical information alone, inclusion of metabolites significantly improved the model fit for ESKD ( $P=1.5e-4$ , Methods, **Supplementary Table 14**). While higher urinary concentrations of X-13698 and N-acetylglutamine were protective (hazard ratio [HR]=0.59 for both), N-acetylkynurenine, N-acetylcitrulline, N-delta-acetylorithine and X-12125 were associated with higher risk (HR range: 1.17-1.47). These metabolites therefore represent potential new biomarkers of ESKD, along with altered N-acetylation capacity as an implicated mechanism, for evaluation in larger studies of CKD progression.

## *Extended acknowledgements*

### **List of GCKD Study Investigators**

A list of nephrologists currently collaborating with the GCKD study is available at <http://www.gckd.org>.

|                                                                                          |                                                                                                                                                                                                                                                                                              |
|------------------------------------------------------------------------------------------|----------------------------------------------------------------------------------------------------------------------------------------------------------------------------------------------------------------------------------------------------------------------------------------------|
| University of Erlangen-Nürnberg                                                          | Kai-Uwe Eckardt, Heike Meiselbach, Markus Schneider, Thomas Dienemann, Hans-Ulrich Prokosch, Barbara Bärthlein, Andreas Beck, Thomas Ganslandt, André Reis, Arif B. Ekici, Susanne Avendaño, Dinah Becker-Grosspitsch, Ulrike Alberth-Schmidt, Birgit Hausknecht, Rita Zitzmann, Anke Weigel |
| University of Freiburg                                                                   | Gerd Walz, Anna Köttgen, Ulla Schultheiß, Fruzsina Kotsis, Simone Meder, Erna Mitsch, Ursula Reinhard                                                                                                                                                                                        |
| RWTH Aachen University                                                                   | Jürgen Floege, Georg Schlieper, Turgay Saritas, Sabine Ernst, Nicole Beaujean                                                                                                                                                                                                                |
| Charité, University Medicine Berlin                                                      | Elke Schaeffner, Seema Baid-Agrawal, Kerstin Theisen                                                                                                                                                                                                                                         |
| Hannover Medical School                                                                  | Hermann Haller, Jan Menne                                                                                                                                                                                                                                                                    |
| University of Heidelberg                                                                 | Martin Zeier, Claudia Sommerer, Rebecca Woitke                                                                                                                                                                                                                                               |
| University of Jena                                                                       | Gunter Wolf, Martin Busch, Rainer Fuß                                                                                                                                                                                                                                                        |
| Ludwig-Maximilians University of München                                                 | Thomas Sitter, Claudia Blank                                                                                                                                                                                                                                                                 |
| University of Würzburg                                                                   | Christoph Wanner, Vera Krane, Antje Börner-Klein, Britta Bauer                                                                                                                                                                                                                               |
| Medical University of Innsbruck, Division of Genetic Epidemiology                        | Florian Kronenberg, Julia Raschenberger, Barbara Kollerits, Lukas Forer, Sebastian Schönherr, Hansi Weissensteiner                                                                                                                                                                           |
| University of Regensburg, Institute of Functional Genomics                               | Peter Oefner, Wolfram Gronwald, Helena Zacharias                                                                                                                                                                                                                                             |
| Department of Medical Biometry, Informatics and Epidemiology (IMBIE), University of Bonn | Matthias Schmid, Jennifer Nadal                                                                                                                                                                                                                                                              |

## *Supplementary Methods*

### **Non-targeted mass spectrometry analysis**

Sample preparation at Metabolon, Inc was carried out as described previously<sup>7</sup>. Briefly, recovery standards were added prior to the first step in the extraction process for quality control purposes. To remove protein, dissociate small molecules bound to protein or trapped in the precipitated protein matrix, and to recover chemically diverse metabolites, proteins were precipitated with methanol under vigorous shaking for 2 min (Glen Mills Genogrinder 2000) followed by centrifugation. The resulting extract was divided into fractions and vacuum dried. For each sample, dried extracts were dissolved in injection solvent containing eight or more injection standards at fixed concentrations, depending on the platform, to assure injection and chromatographic consistency. Each sample was analyzed by four ultra-high performance liquid chromatography-tandem mass spectrometry (UPLC-MS/MS) methods: 1) One aliquot was analyzed using acidic positive ion conditions, chromatographically optimized for more hydrophilic compounds. In this method, the extract was gradient eluted from a C18 column (Waters UPLC BEH C18-2.1x100 mm, 1.7  $\mu$ m) using water and methanol, containing 0.05% perfluoropentanoic acid (PFPA) and 0.1% formic acid (FA). 2) A second aliquot was also analyzed using acidic positive ion conditions; however, it was chromatographically optimized for more hydrophobic compounds. In this method, the extract was gradient eluted from the same aforementioned C18 column using methanol, acetonitrile, water, 0.05% PFPA and 0.01% FA and was operated at an overall higher organic content. 3) A third aliquot was analyzed using basic negative ion optimized conditions using a separate dedicated C18 column. The basic extracts were gradient eluted from the column using methanol and water, however with 6.5mM ammonium bicarbonate at pH 8. 4) The

fourth aliquot was analyzed via negative ionization following elution from a HILIC column (Waters UPLC BEH Amide 2.1x150 mm, 1.7  $\mu$ m) using a gradient consisting of water and acetonitrile with 10mM ammonium formate, pH 10.8. 5) A fifth aliquot was reserved for backup.

Three types of controls were analyzed in concert with the experimental samples: samples generated from a pool of human urine extensively characterized by Metabolon, Inc. served as technical replicate throughout the data set; extracted water samples served as process blanks; and a cocktail of standards spiked into every analyzed sample allowed instrument performance monitoring. Instrument variability was determined by calculating the median relative standard deviation (RSD) for the standards that were added to each sample prior to injection into the mass spectrometers (median RSD=5-7%; n=31 standards). Overall process variability was determined by calculating the median RSD for all endogenous metabolites (i.e., non-instrument standards) present in 100% of the pooled human urine samples (median RSD=7-9%; n>1,000 metabolites). All RSDs for metabolites present in at least 90% of the pooled human urine samples are reported in **Supplementary Table 2**. Experimental samples and controls were randomized across the platform run. All methods utilized a Waters ACQUITY UPLC and a Thermo Scientific Q-Exactive high resolution/accurate mass spectrometer interfaced with a heated electrospray ionization (HESI-II) source and Orbitrap mass analyzer operated at 35,000 mass resolution. Instruments were tuned and calibrated for mass resolution and mass accuracy daily. The MS analysis alternated between MS and data-dependent MS<sub>n</sub> scans using dynamic exclusion. The scan range varied slightly between methods but covered 70-1,000 m/z.



## **Metabolite identification and quantification**

Metabolites were identified by automated comparison of the ion features in the experimental samples to a reference library of chemical standard entries that included retention time, molecular weight (m/z), preferred adducts, and in-source fragments as well as associated MS spectra, and curated by visual inspection for quality control using software developed at Metabolon. Identification of known chemical entities was based on comparison to Metabolon's spectral library of >4,500 purified chemical standards. Commercially available purified standard compounds have been acquired and registered into LIMS for distribution to the various UPLC-MS/MS platforms for determination of their detectable characteristics. Known metabolites reported in this study conformed to confidence Level 1 (the highest confidence level of identification) of the Metabolomics Standards Initiative<sup>8,9</sup>, unless otherwise denoted with an asterisk. Additional mass spectral entries have been created for structurally unnamed biochemicals (>2,750 in the Metabolon library), which have been identified by virtue of their recurrent nature (both chromatographic and mass spectral). These compounds have the potential to be identified by future acquisition of a matching purified standard or by classical structural analysis, and were included in this study.

Peaks were quantified using area-under-the-curve. Raw area counts for each metabolite in each sample were normalized to correct for variation resulting from instrument inter-day tuning differences by the median value for each run-day, therefore, setting the medians to 1.0 for each run. This preserved variation between samples but allowed metabolites of widely different raw peak areas to be compared on a similar graphical scale.

## **GWAS of eigenmetabolites**

Netboost was applied to the GCKD discovery sample, and the resulting clustering transferred to the replication sample. GWAS were conducted separately for discovery and replication eigenmetabolites and results were meta-analyzed using a fixed effects inverse variance model in METAL<sup>10</sup>. Statistical significance was defined as genome-wide significance ( $P < 5e-8$ ) in the discovery sample, a one-sided  $P < 0.05$  in the replication sample, and significance ( $P < 2.4e-10$ ) in the meta-analysis after correcting for multiple testing by a Bonferroni procedure ( $5e-8/212$  eigenmetabolites). Significantly associated 1-Mb intervals were merged by overlap, and loci were merged into genetic regions across eigenmetabolites if their index SNPs were correlated ( $r^2 > 0.8$ ). The extended MHC region (chromosome 6, 25.5-34 Mb) was considered as one region.

### **Associations with CKD progression and CKD-related endpoints**

Prospective endpoints abstracted in the GCKD-study include ESKD, cardiovascular events and death<sup>11</sup>. For this project, endpoints over the first four years of follow-up were included (median follow-up time: 1,476 days). To evaluate the association of the 30 *NAT8*-associated metabolites, survival regression models were fitted for time from study entry to first event. Evaluated endpoints were overall mortality, ESKD (combined endpoint of dialysis, kidney transplantation and kidney-related death) and major adverse cardiac events (MACE, combined endpoint of myocardial infarction, stroke, peripheral vascular disorders and heart-related deaths). Besides  $\log_2$ -transformed metabolites, the four clinical variables age, sex,  $\log(\text{eGFR})$  and  $\log(\text{UACR})$  were considered; 1,619 GCKD participants had complete data. Three different Cox proportional hazard models were fitted: 1) clinical model (4 clinical variables), 2) metabolite model (selected metabolites using backward elimination based on Akaike's information criterion), and 3) combined model (repetition of backward elimination of metabolites selected for model 2 with forced inclusion of clinical variables). The deviance test based on the likelihood ratio statistic was used to evaluate significance of model improvement. The Cox proportional hazard model provided hazard ratio estimates for overall mortality and cause-specific hazard ratio estimates for ESKD and MACE in the presence of competing events<sup>12</sup>. No metabolites were associated with the competing events after correction for multiple testing (data not shown). No major violations to the proportional hazard assumption were found based on scaled Schoenfeld residuals and graphical assessment<sup>13</sup>.

## References:

1. Major, J.M. *et al.* Genome-wide association study identifies three common variants associated with serologic response to vitamin E supplementation in men. *J Nutr* **142**, 866-71 (2012).
2. Major, J.M. *et al.* Genome-wide association study identifies common variants associated with circulating vitamin E levels. *Hum Mol Genet* **20**, 3876-83 (2011).
3. Takeuchi, F. *et al.* A genome-wide association study confirms VKORC1, CYP2C9, and CYP4F2 as principal genetic determinants of warfarin dose. *PLoS Genet* **5**, e1000433 (2009).
4. Li, Y. *et al.* Genome-Wide Association Studies of Metabolites in Patients with CKD Identify Multiple Loci and Illuminate Tubular Transport Mechanisms. *J Am Soc Nephrol* **29**, 1513-1524 (2018).
5. Bertran, J. *et al.* Expression cloning of a cDNA from rabbit kidney cortex that induces a single transport system for cystine and dibasic and neutral amino acids. *Proc Natl Acad Sci U S A* **89**, 5601-5 (1992).
6. Veiga-da-Cunha, M. *et al.* Molecular identification of NAT8 as the enzyme that acetylates cysteine S-conjugates to mercapturic acids. *J Biol Chem* **285**, 18888-98 (2010).
7. Evans, A.M. *et al.* High Resolution Mass Spectrometry Improves Data Quantity and Quality as Compared to Unit Mass Resolution Mass Spectrometry in High-Throughput Profiling Metabolomics. *Metabolomics* **4**, 7 (2014).
8. Sumner, L.W. *et al.* Proposed minimum reporting standards for chemical analysis Chemical Analysis Working Group (CAWG) Metabolomics Standards Initiative (MSI). *Metabolomics* **3**, 211-221 (2007).
9. Schrimpe-Rutledge, A.C., Codreanu, S.G., Sherrod, S.D. & McLean, J.A. Untargeted Metabolomics Strategies-Challenges and Emerging Directions. *J Am Soc Mass Spectrom* **27**, 1897-1905 (2016).
10. Willer, C.J., Li, Y. & Abecasis, G.R. METAL: fast and efficient meta-analysis of genomewide association scans. *Bioinformatics* **26**, 2190-1 (2010).
11. Eckardt, K.U. *et al.* The German Chronic Kidney Disease (GCKD) study: design and methods. *Nephrol Dial Transplant* **27**, 1454-60 (2012).
12. Austin, P.C., Lee, D.S. & Fine, J.P. Introduction to the Analysis of Survival Data in the Presence of Competing Risks. *Circulation* **133**, 601-9 (2016).
13. Grambsch, P.M. & Therneau, T.M. Proportional Hazards Tests and Diagnostics Based on Weighted Residuals. *Biometrika* **81**, 515-526 (1994).

### **Supplementary Figure 1: Regional association plots for mQTLs identified in mGWAS of urinary metabolite concentrations**

For each of the 240 mQTLs, the region for plotting was selected as the outer borders of merged overlapping 1-Mb windows. The extended MHC region was treated as one region. The index SNP with the lowest p-value is indicated. P-values were calculated based on linear regression. The metabolite that gave rise to the association is included in the title. Linkage disequilibrium information, used to color-code correlation with the index SNP, was calculated from the analyzed subsample of the GCKD study. For additional detail on index SNP association see **Supplementary Table 3**.

### inosine

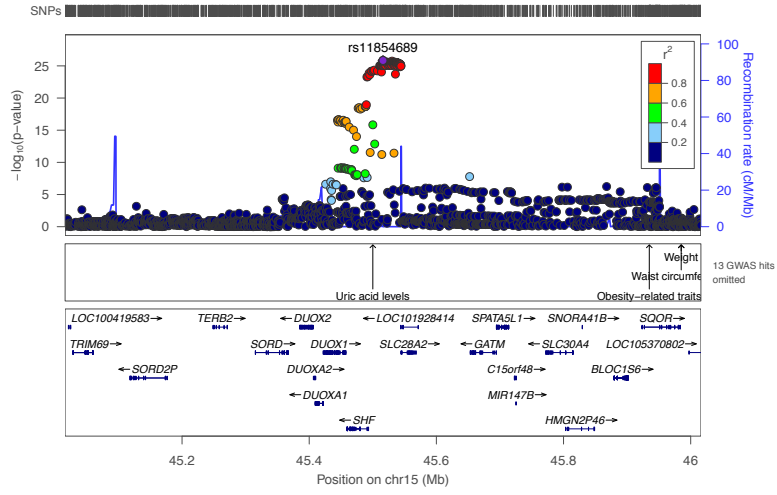

### myo-inositol

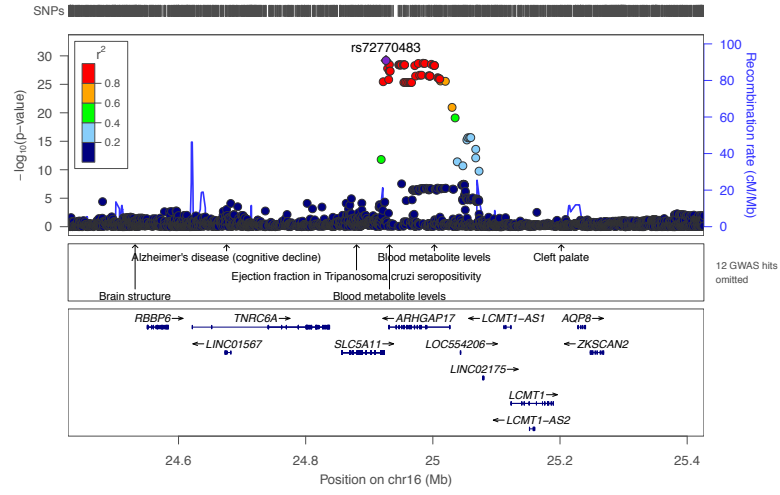

### tyrosine

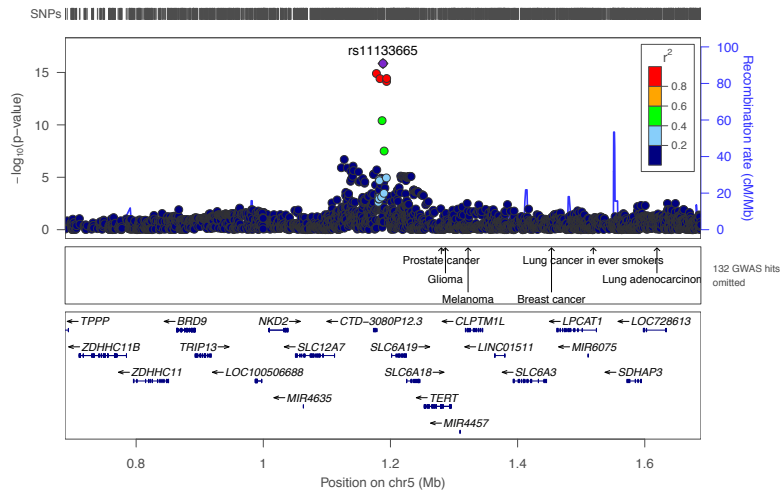

### lysine

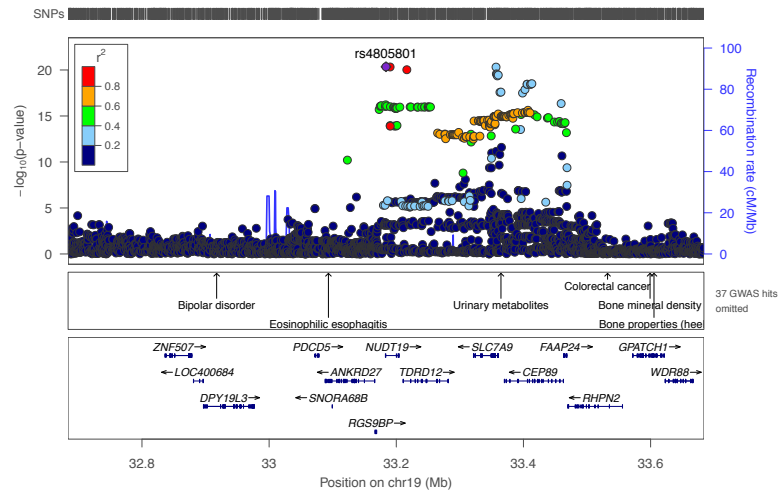

### 2'-deoxyguanosine

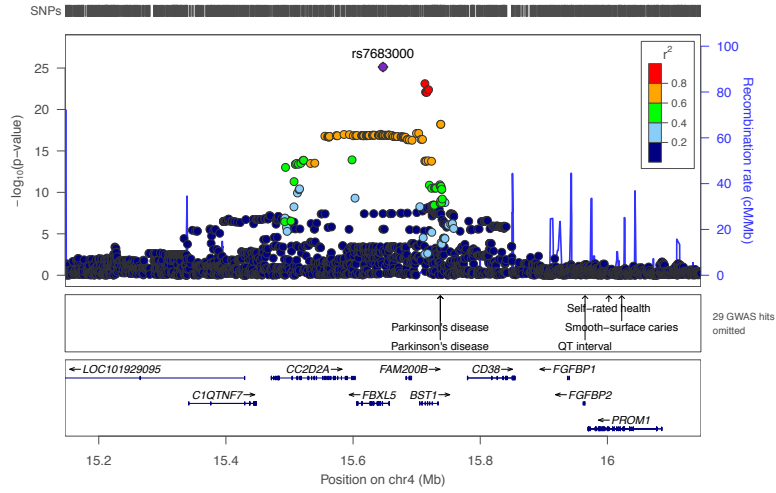

### kynurenate

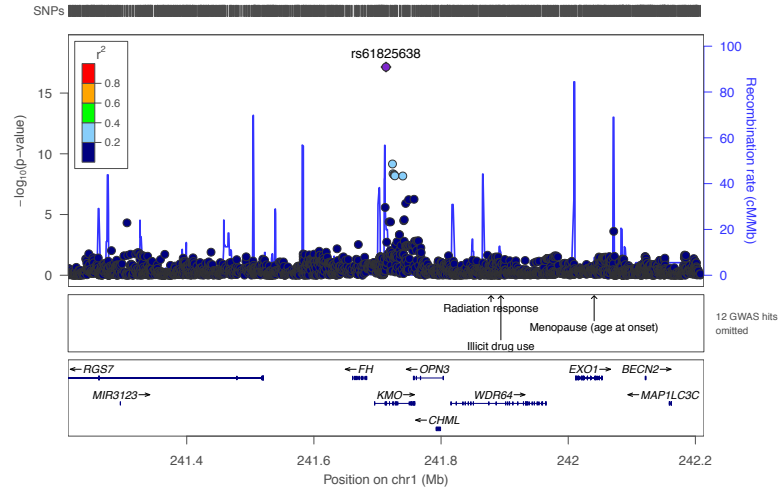

### methylmalonate (MMA)

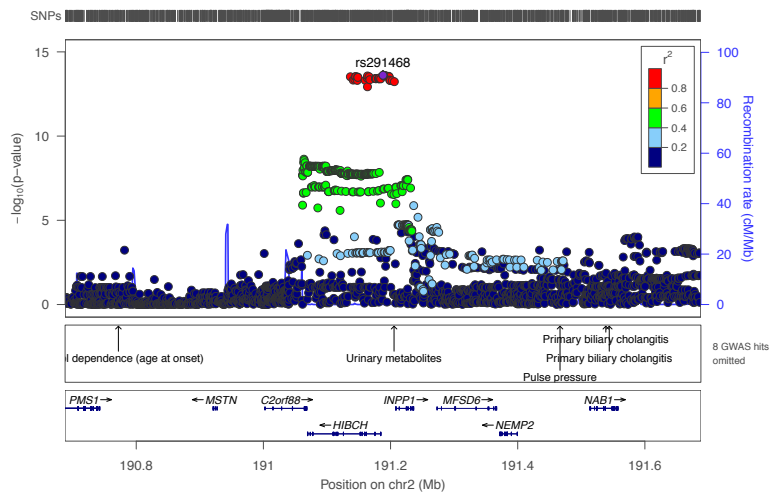

### picolinate

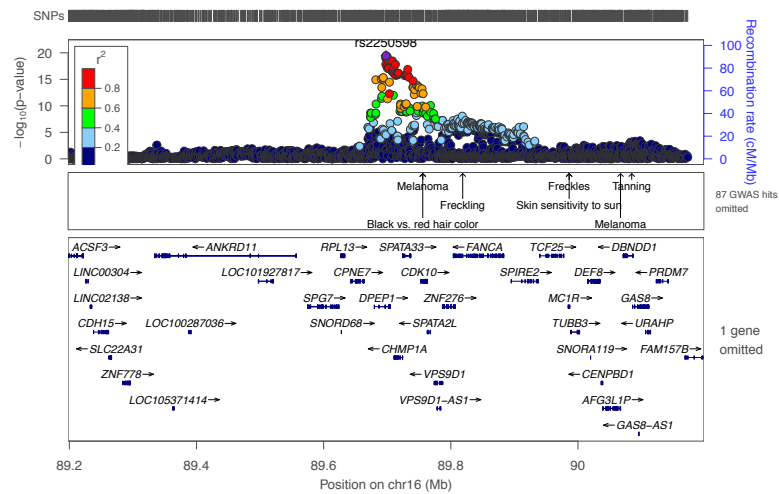

### kynurenine

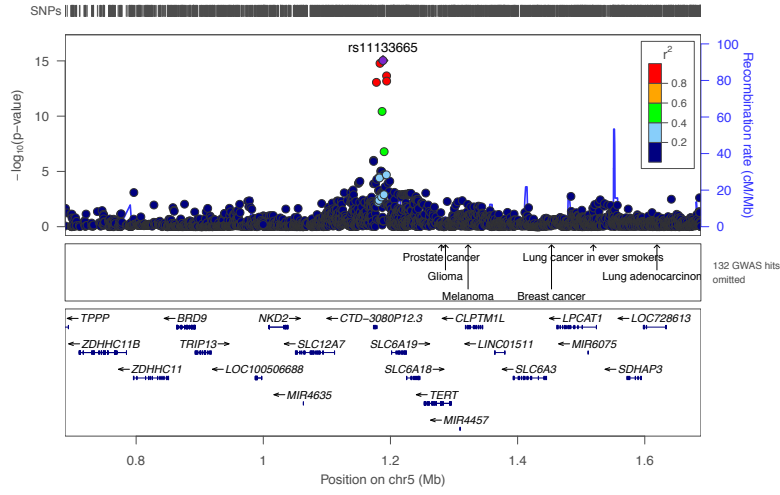

### 4-acetamidobutanoate

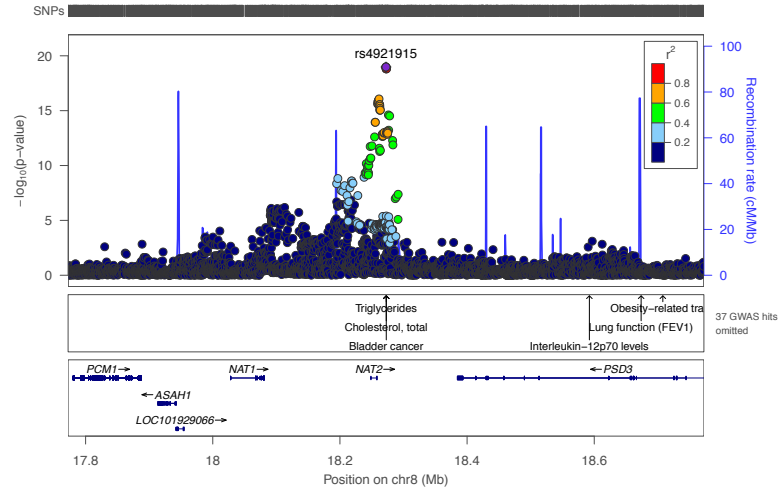

### 3-aminoisobutyrate

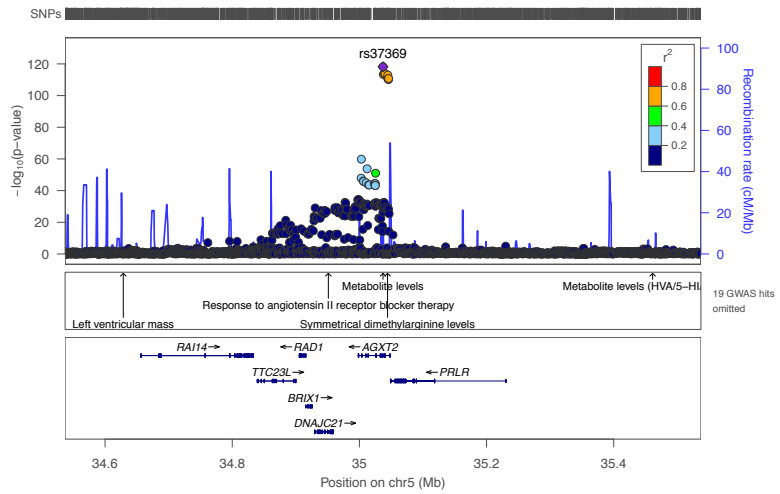

### 3-aminoisobutyrate

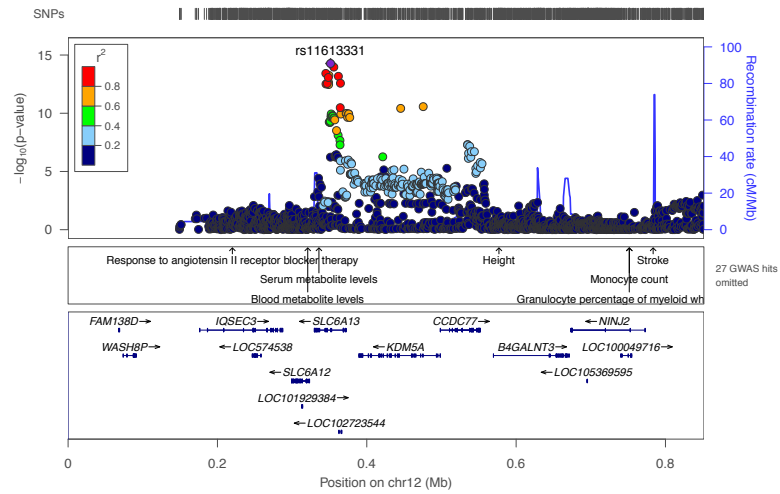



### 4-guanidinobutanoate

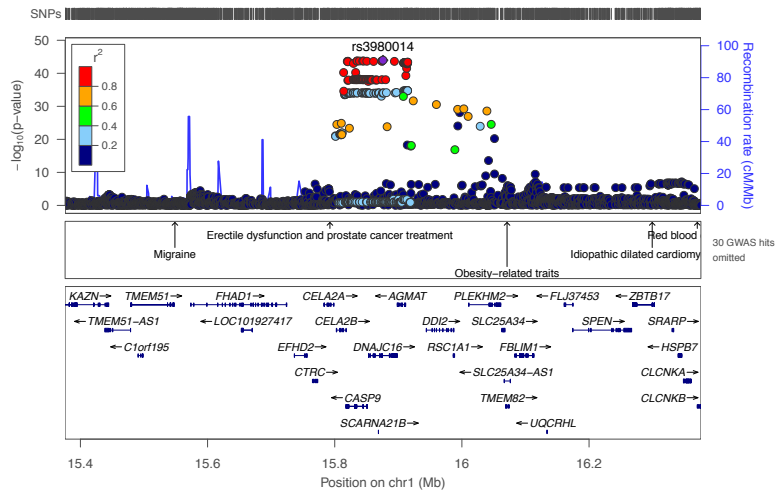

### 5-hydroxylysine

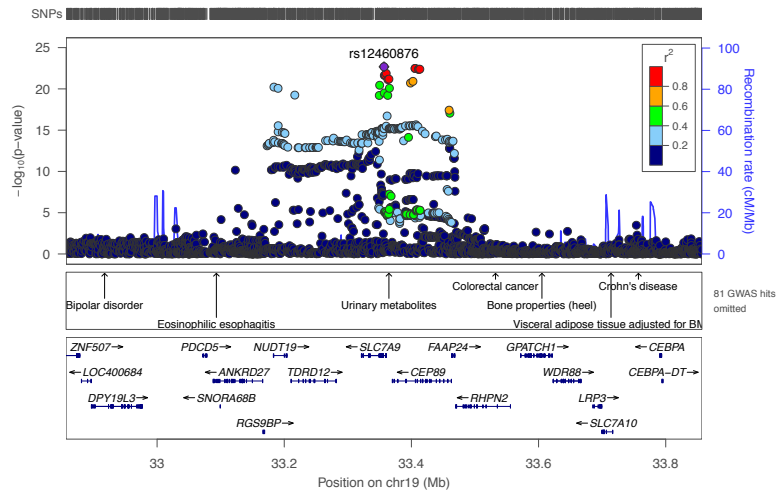

### imidazole lactate

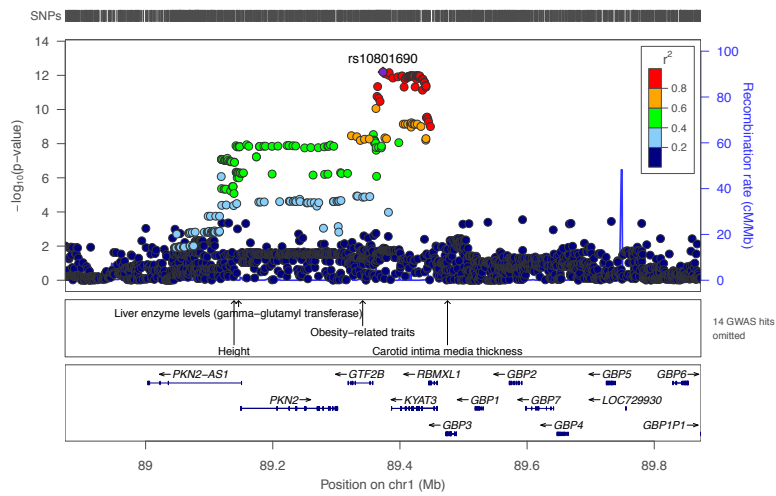

### imidazole lactate

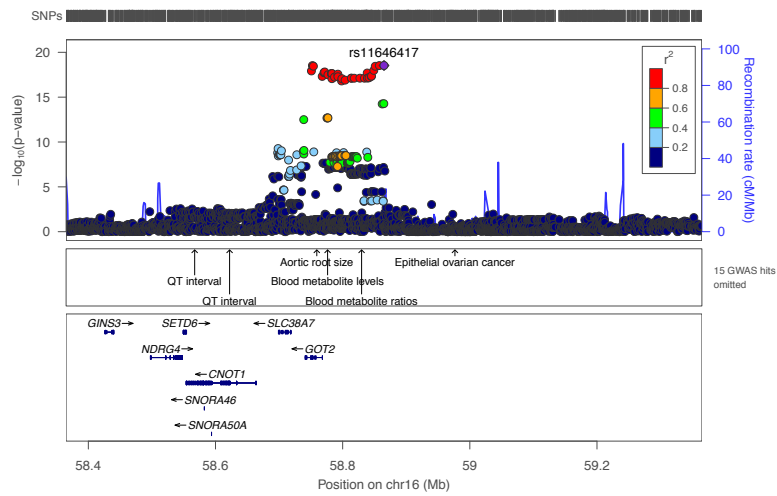

### methylsuccinate

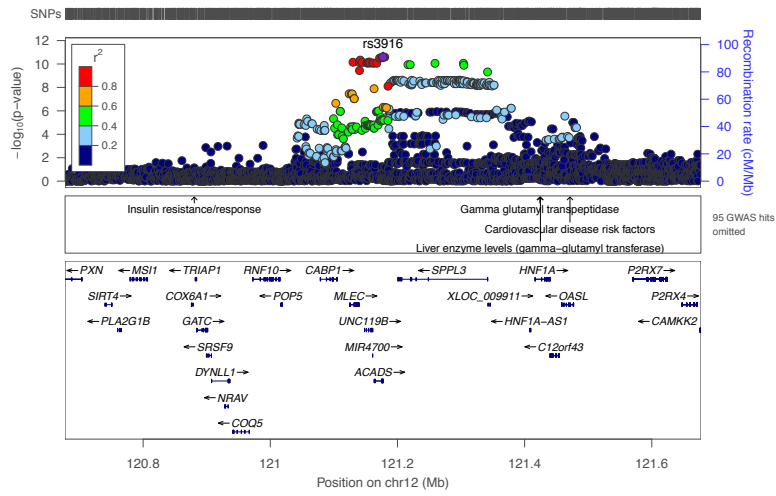

### ethylmalonate

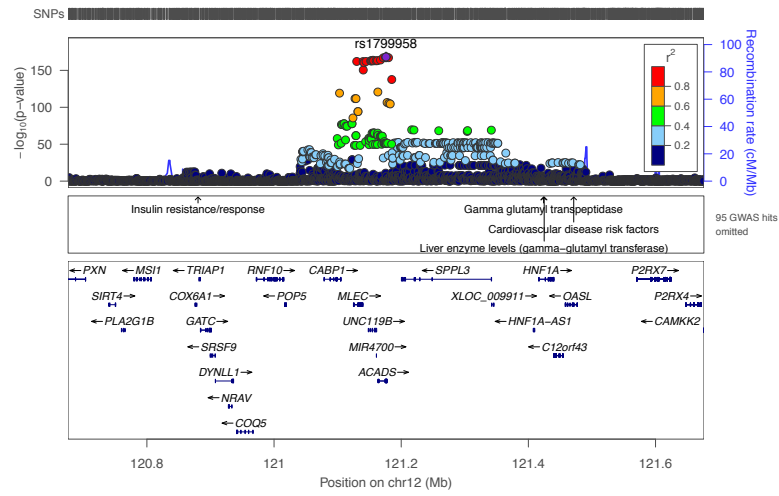

### N-acetyllecucine

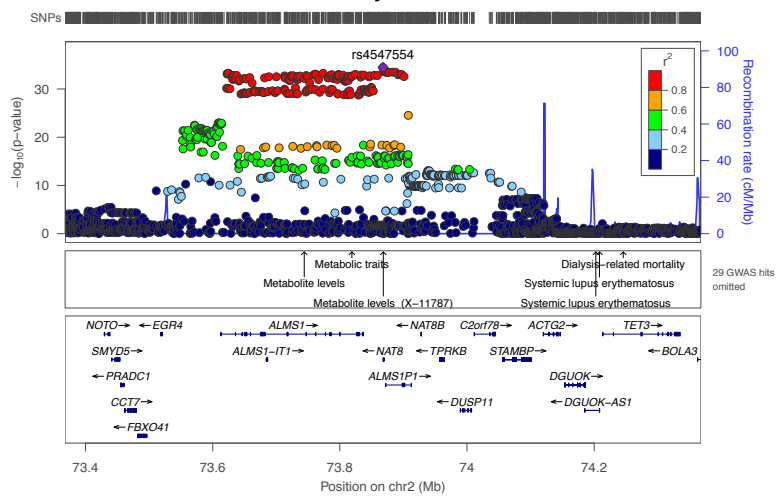

### tigloylglycine

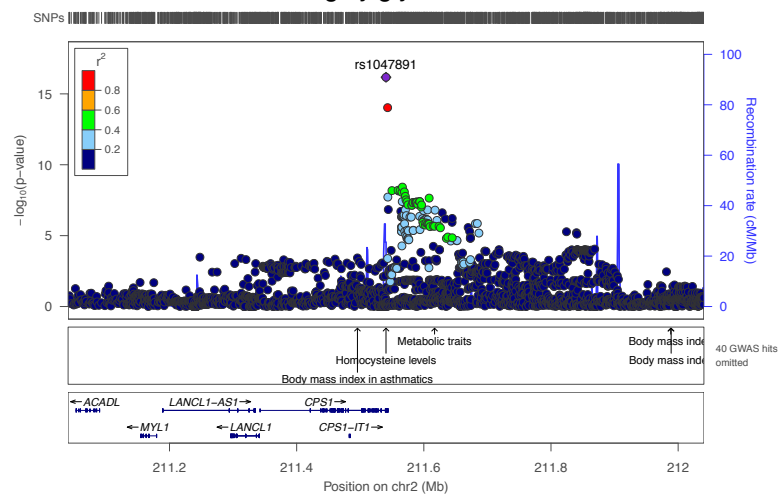

### phosphoethanolamine

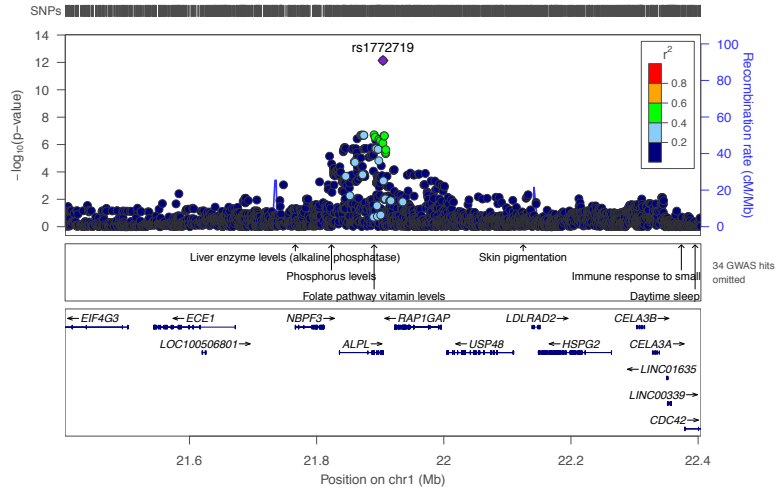

### pyridoxal

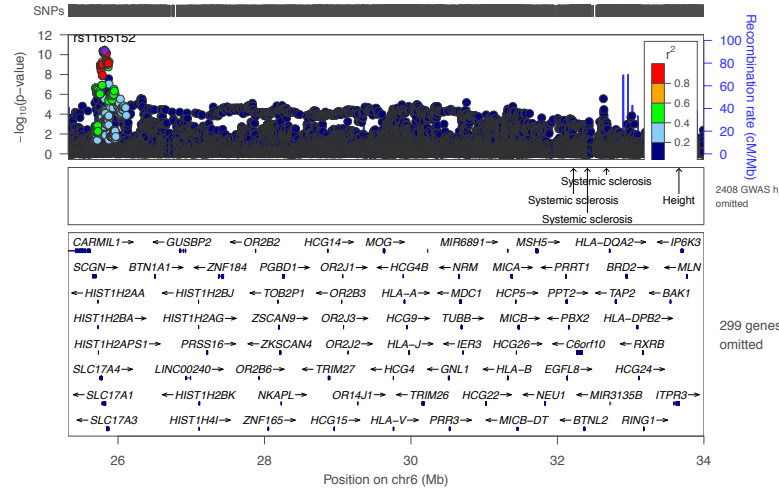

### 4-hydroxyphenylpyruvate

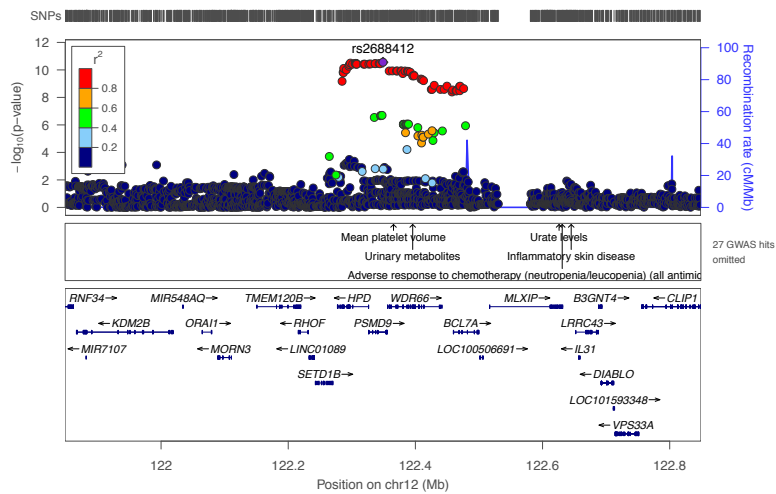

### gamma-glutamylhistidine

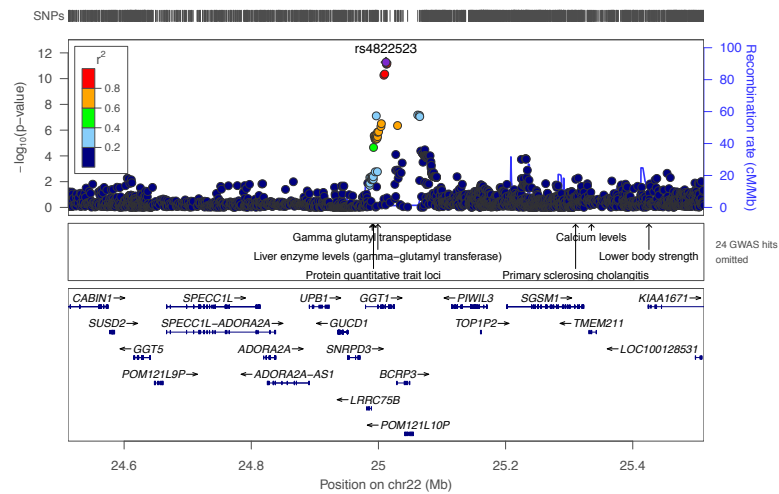

### 5-aminovaleerate

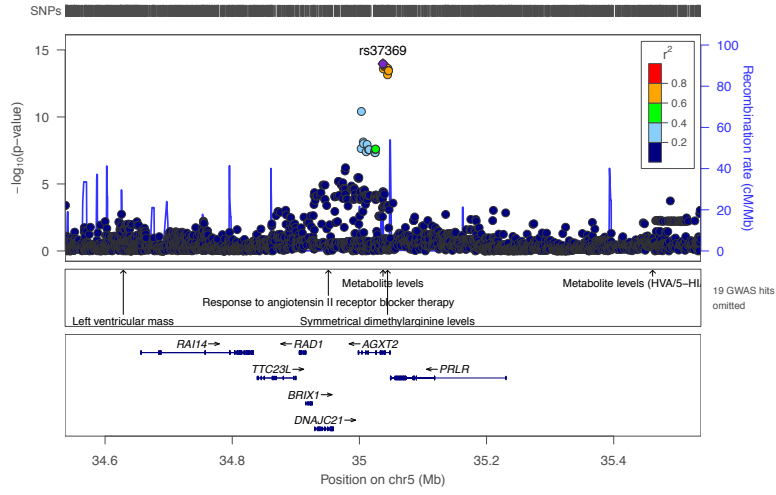

### indolelactate

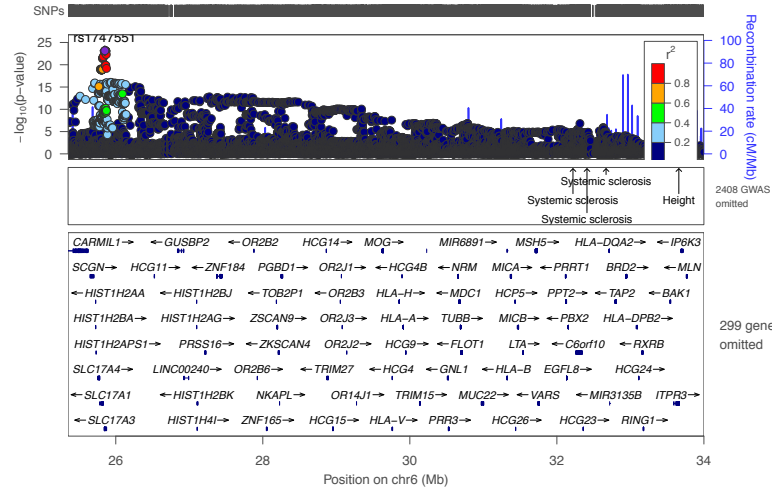

### gamma-glutamylleucine

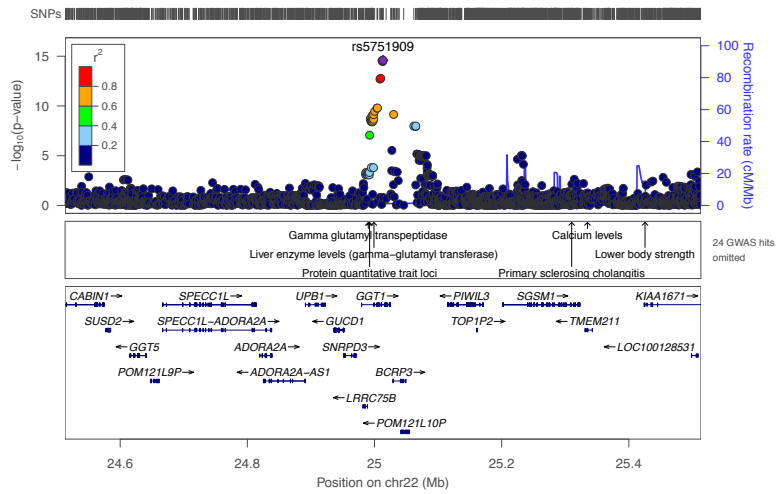

### 3-hydroxykynurenine

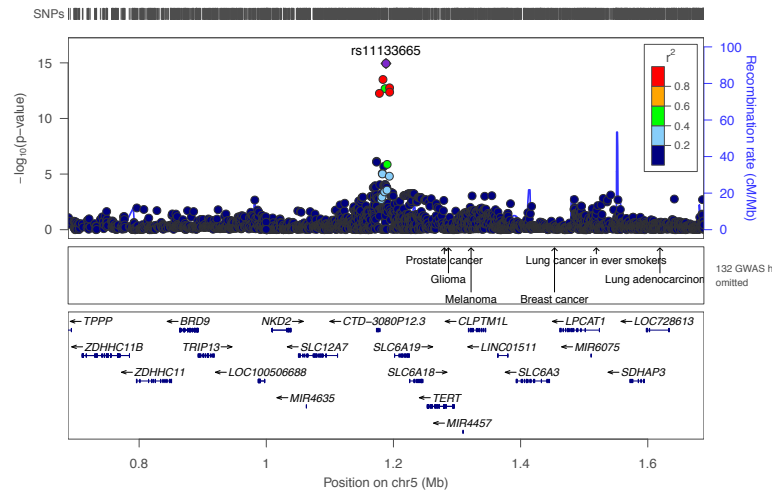

### 4-ureidobutyrate

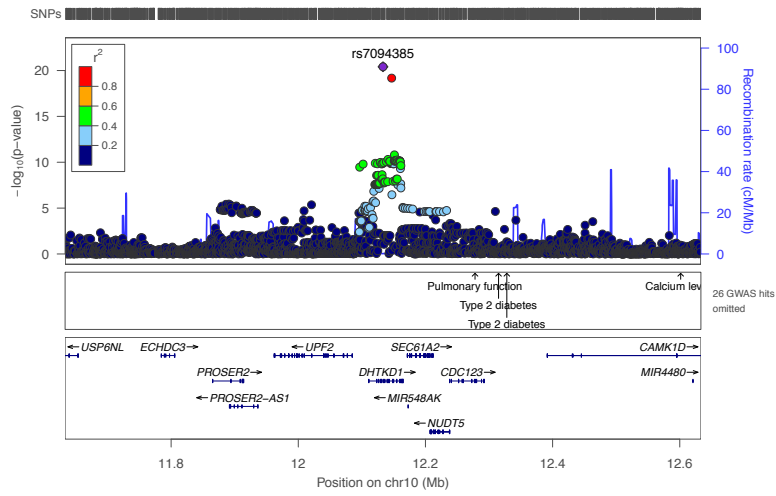

### homocitrulline

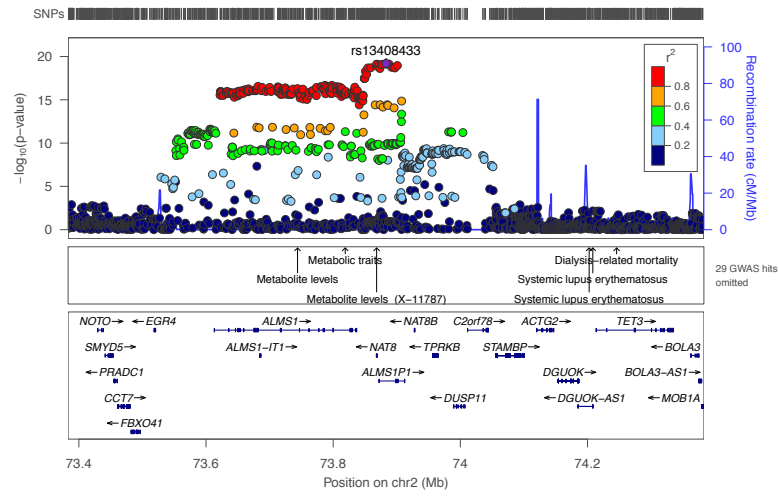

### ribonate

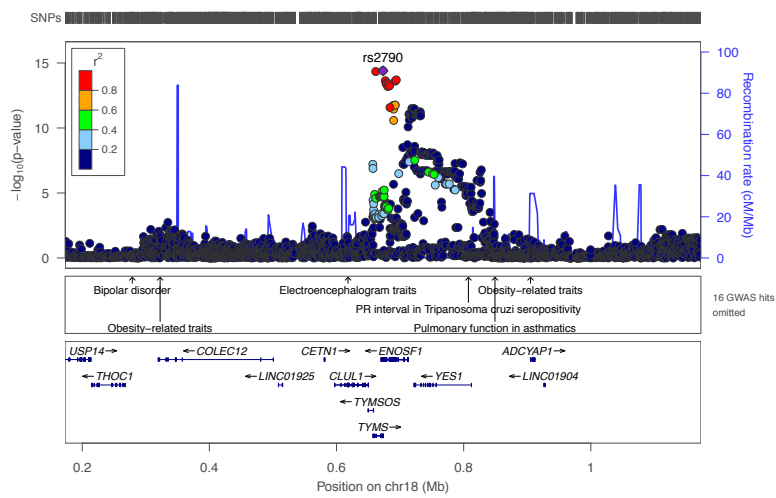

### isoxanthopterin

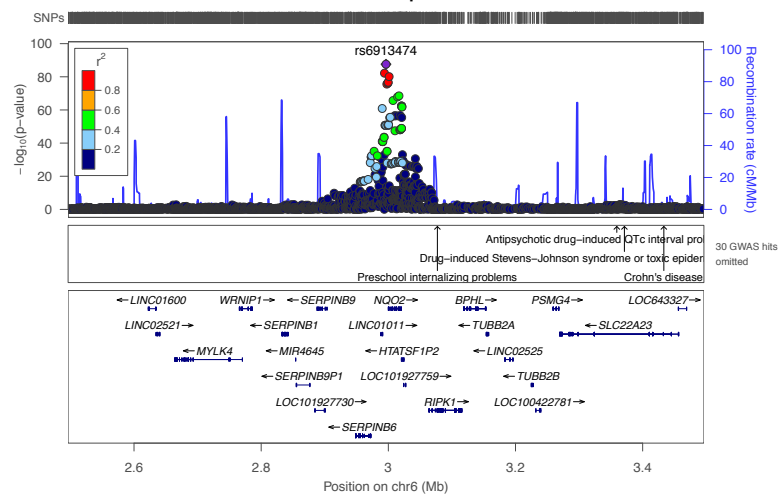

### adenosine 3',5'-cyclic monophosphate (cAMP)

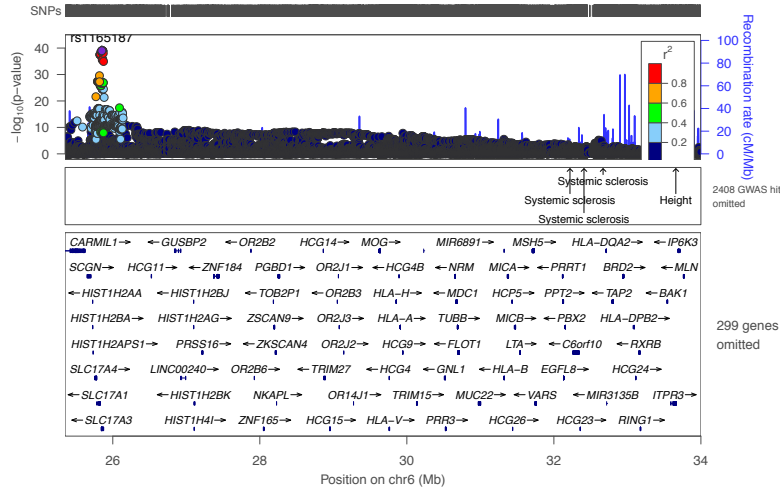

### 2-methylbutyrylglycine

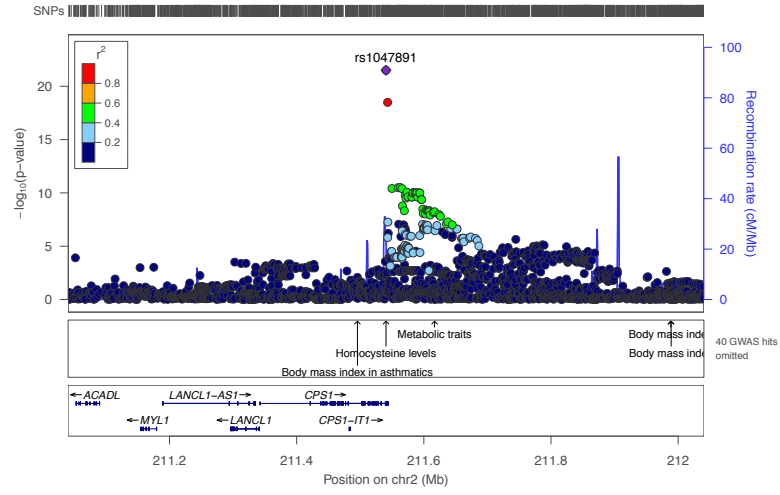

### 3-methylcrotonylglycine

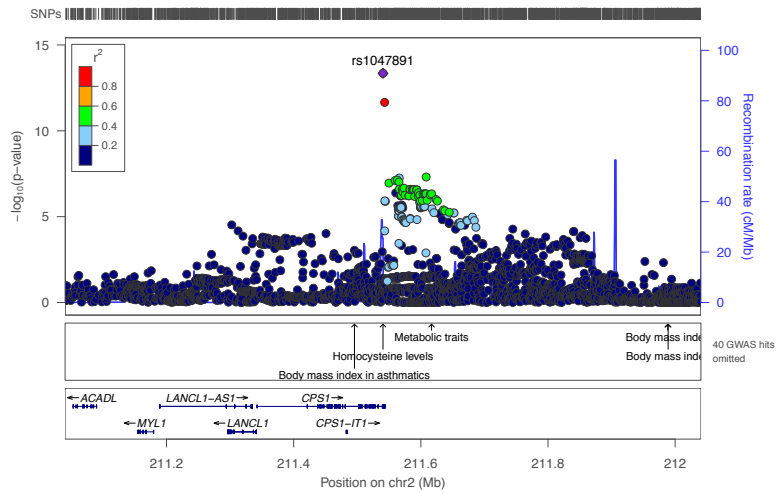

### N-acetyltyrosine

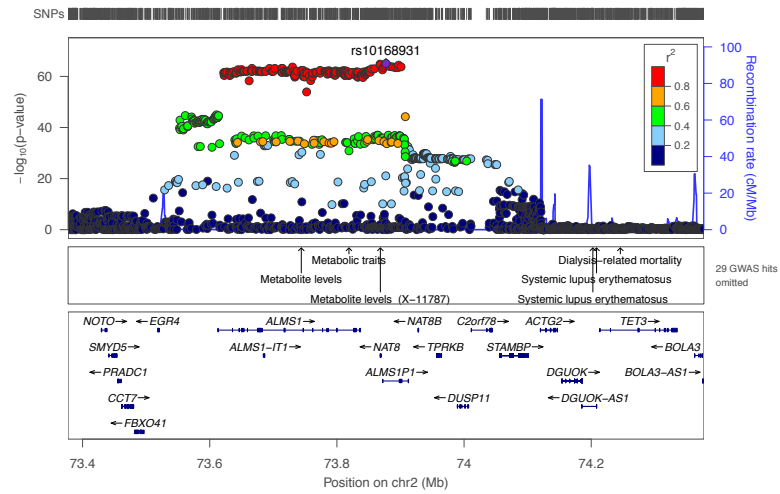

### N-acetytyrosine

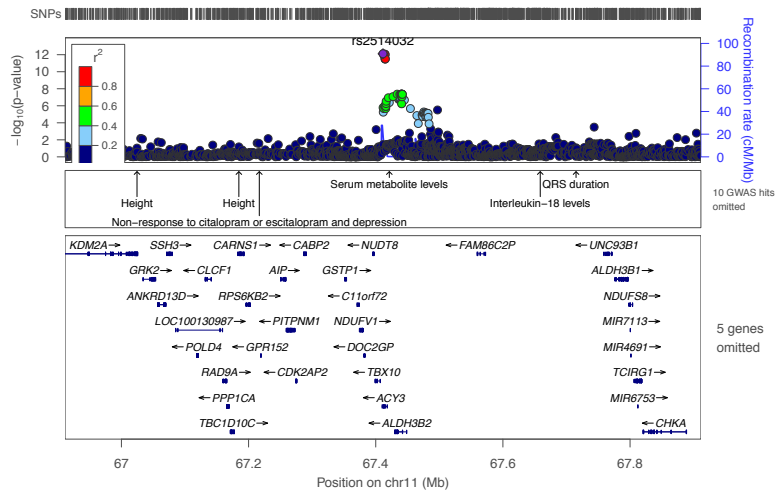

### pregnenediol disulfate (C21H34O8S2)\*

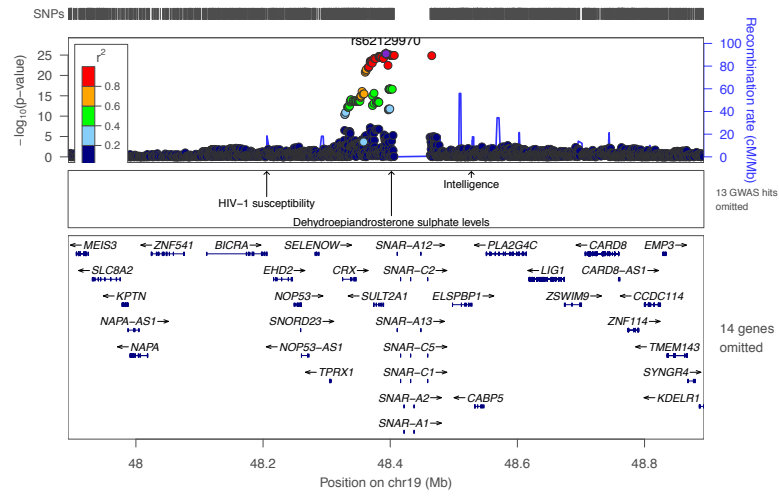

### glycocholenate sulfate\*

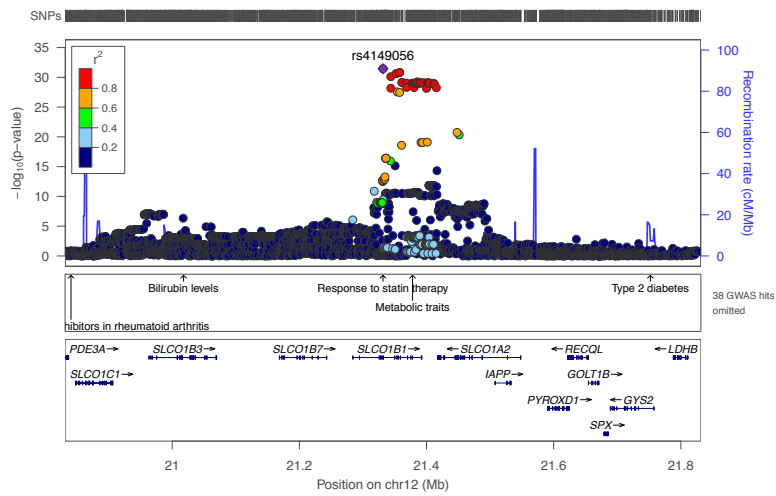

### taurocholenate sulfate

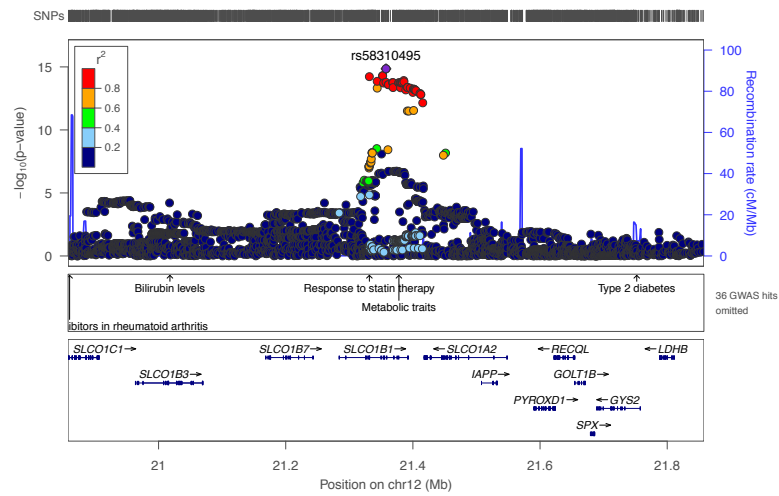

### andro steroid monosulfate C19H28O6S (1)\*

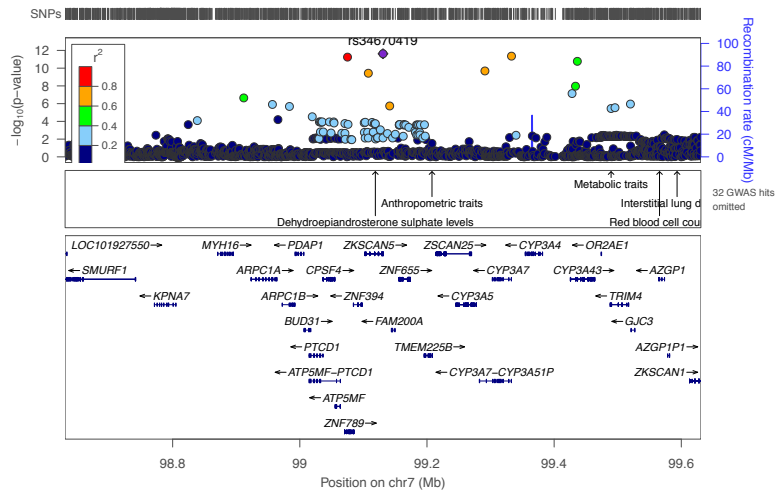

### N-alpha-acetylorithine

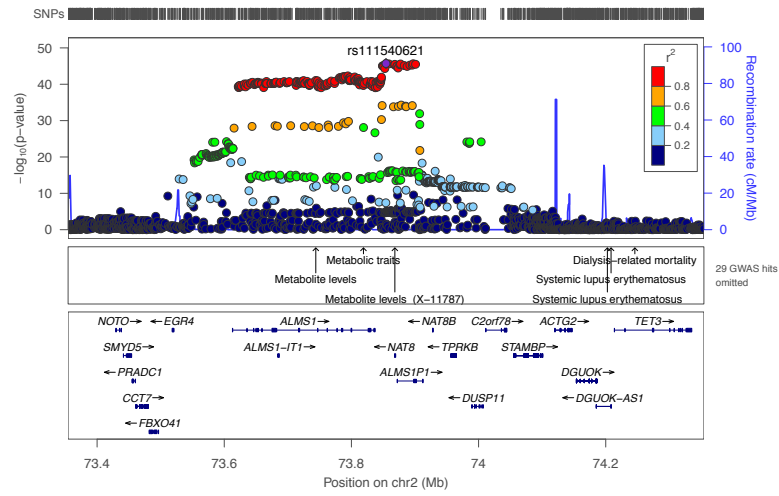

### nicotinamide riboside

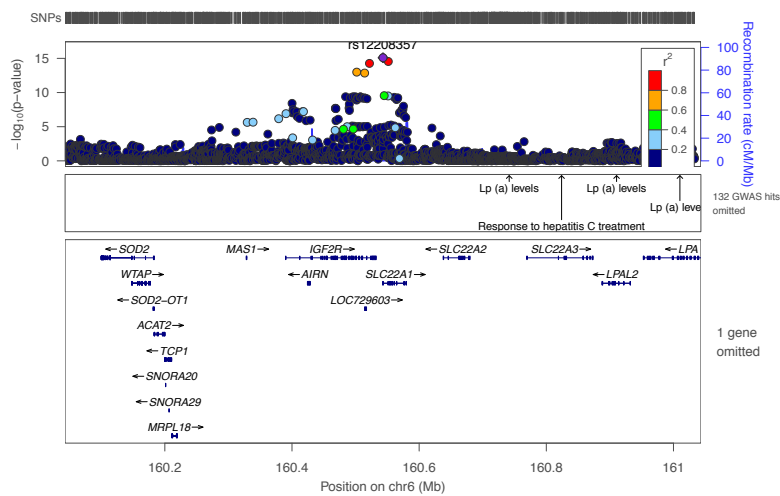

### gamma-glutamylphenylalanine

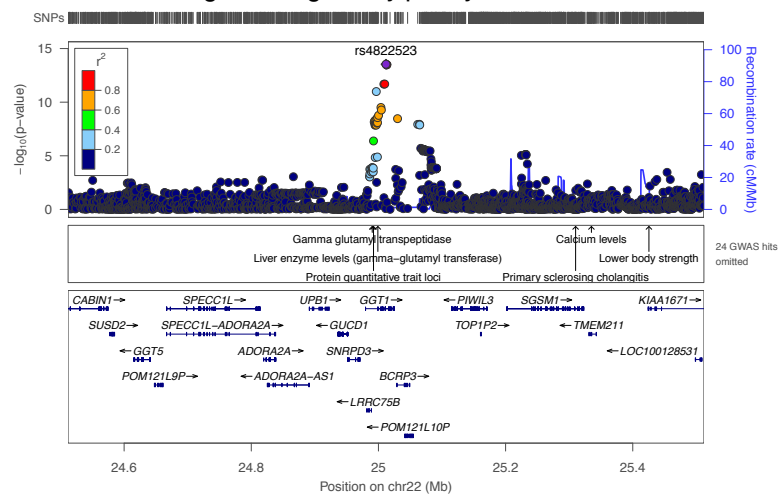



### isobutyrylcarnitine (C4)

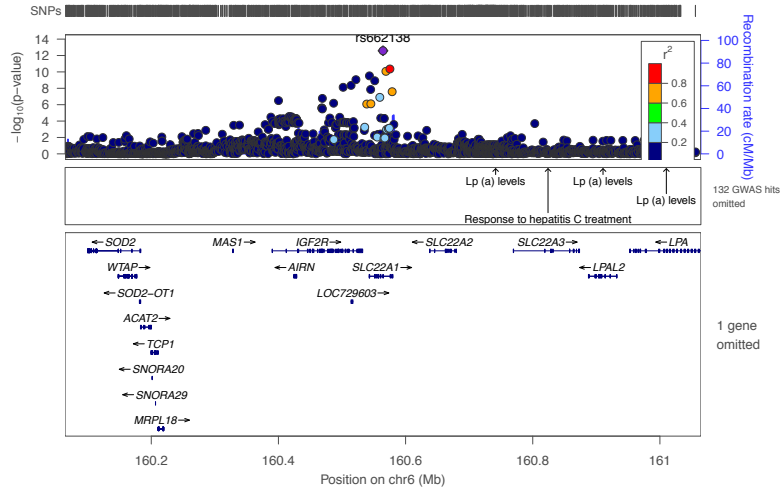

### gamma-glutamyl-epsilon-lysine

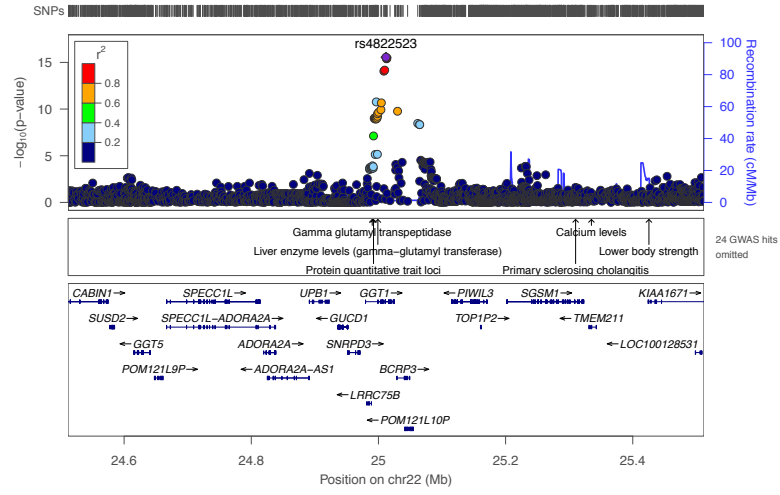

### N-acetylasparagine

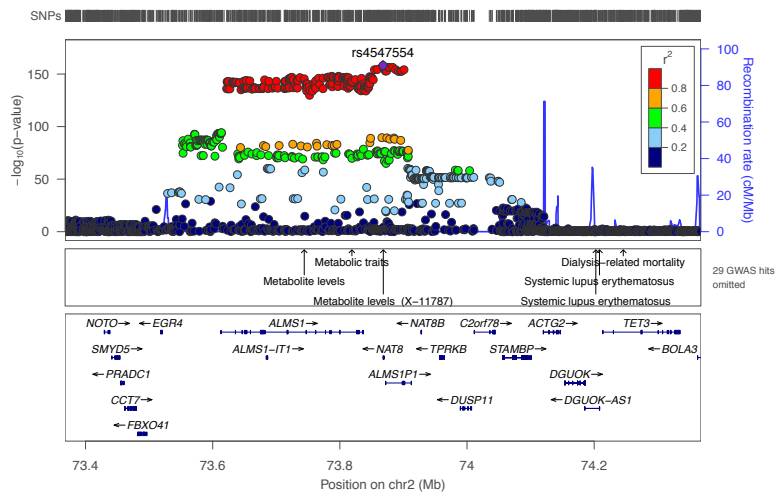

### N-acetylglutamine

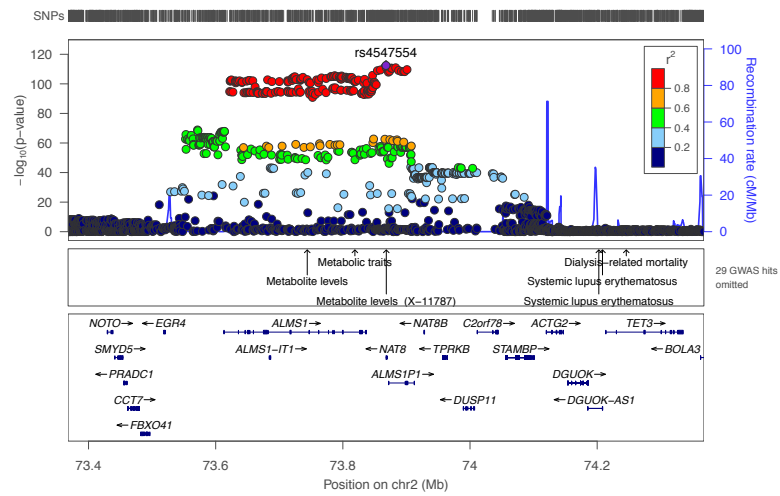

### N-acetylhistidine

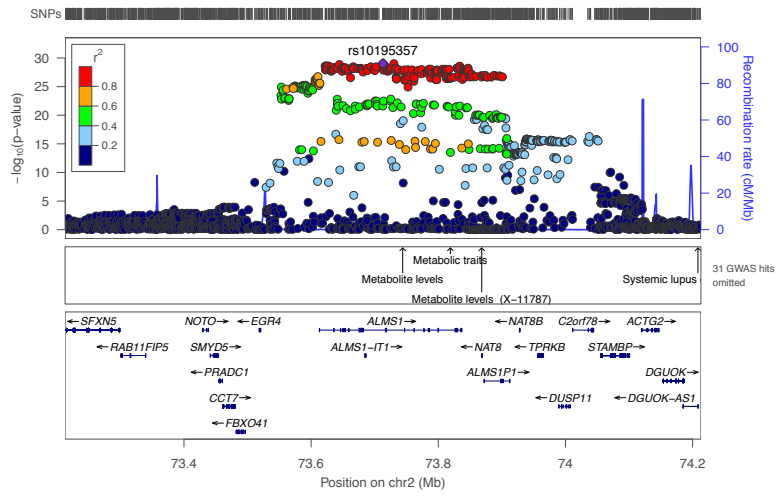

### gamma-glutamylglycine

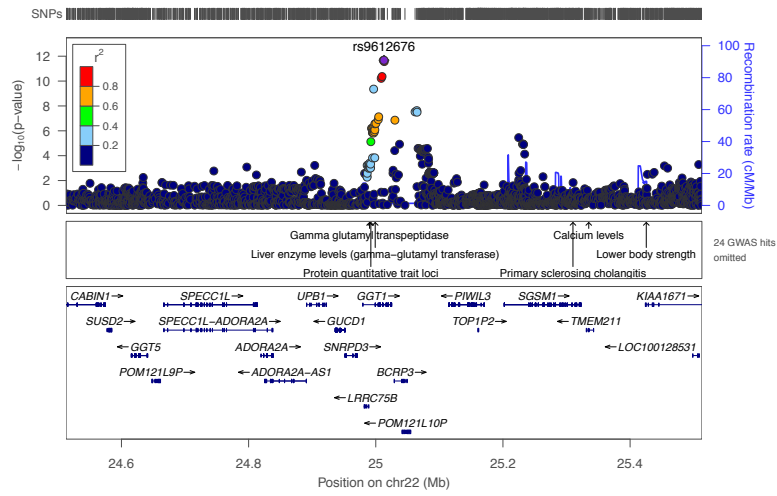

### N-acetylphenylalanine

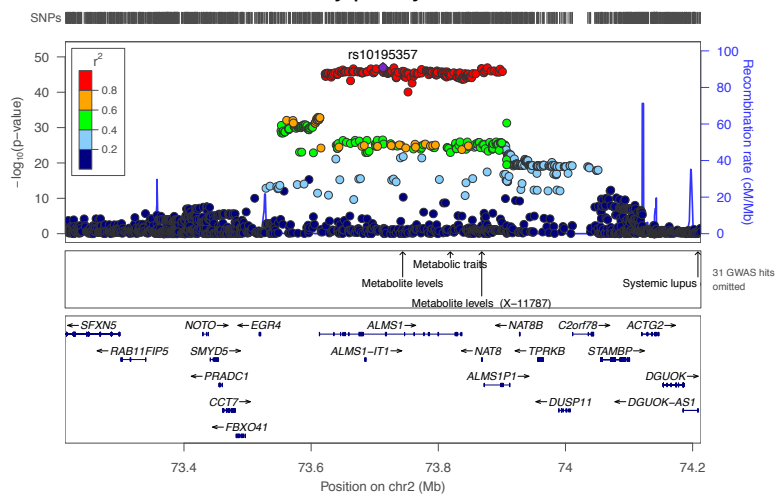

### N-acetylphenylalanine

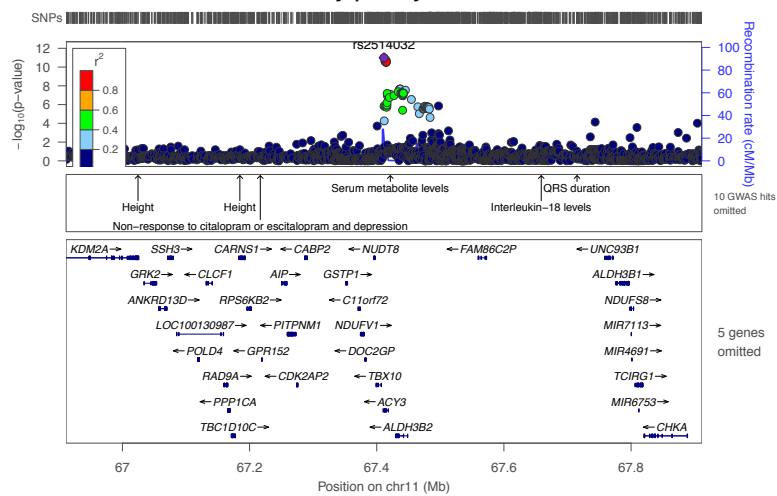

### N-acetylarginine

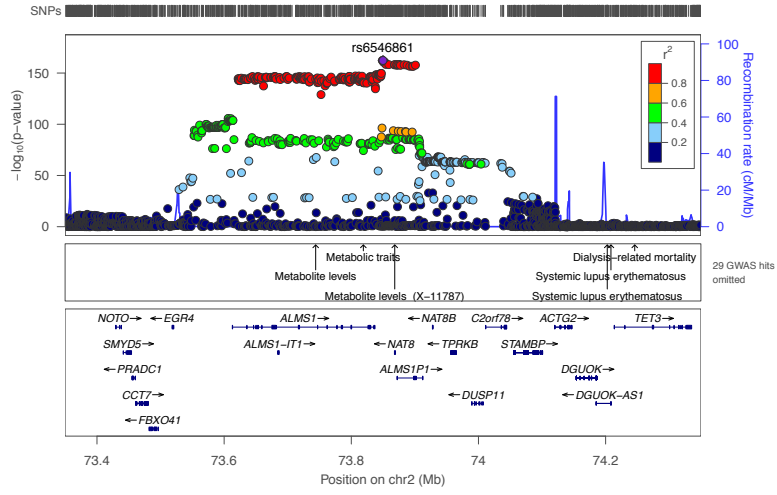

### epiandrosterone sulfate

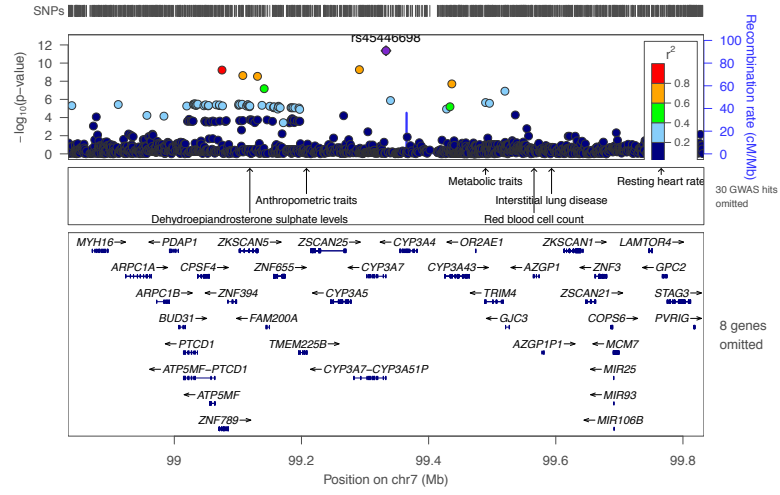

### tauro-beta-muricholate

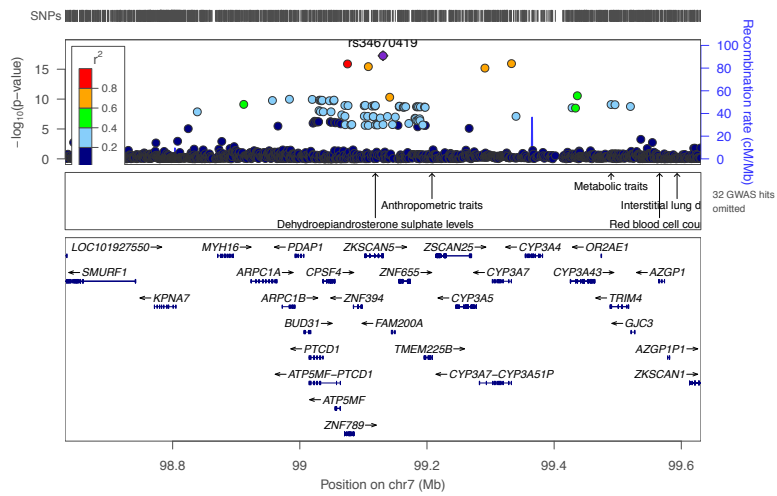

### 1-methylxanthine

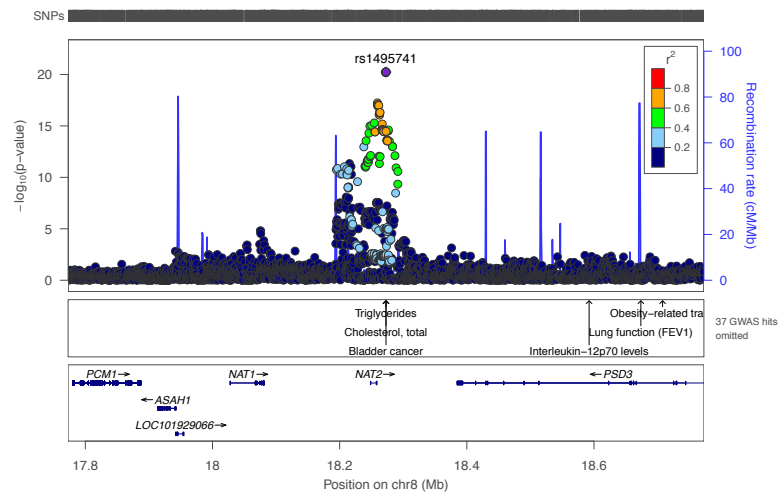

### 1-methylurate

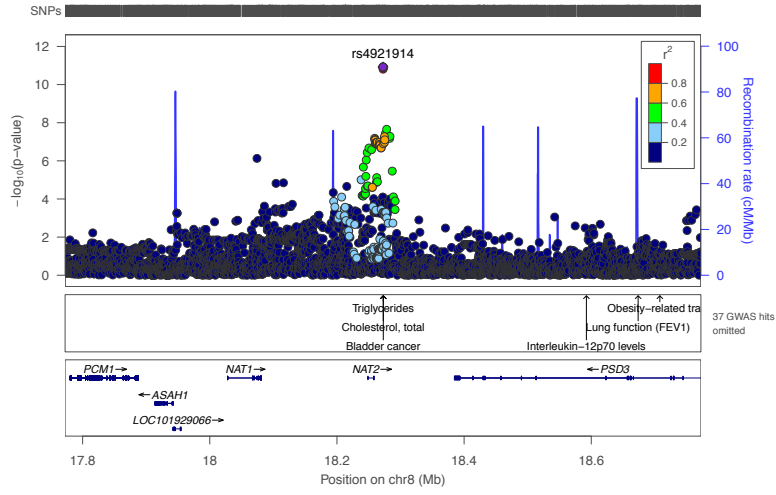

### 5-acetylamino-6-formylamino-3-methyluracil

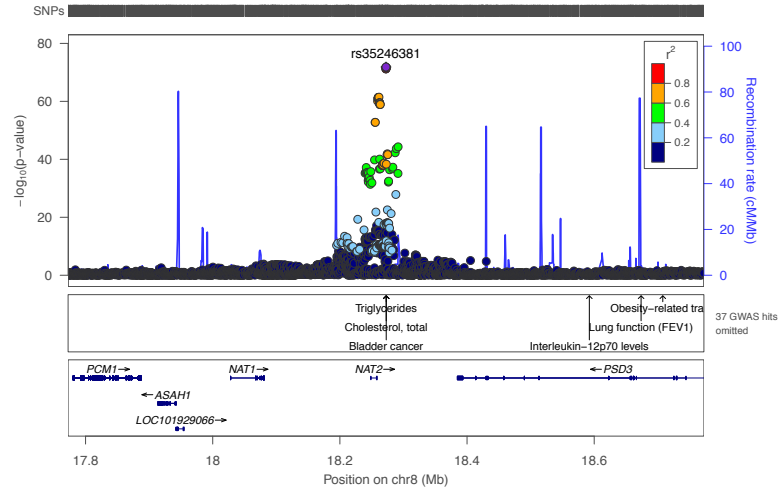

### 5-acetylamino-6-amino-3-methyluracil

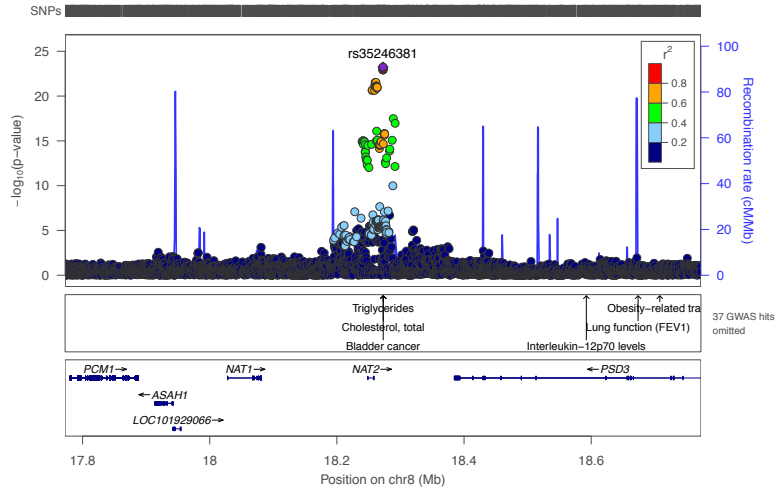

### beta-guanidinopropanoate

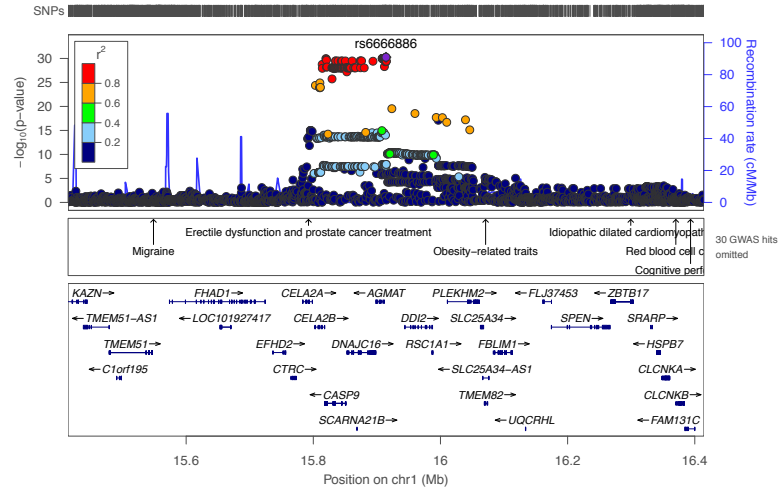

### isovalerylglycine

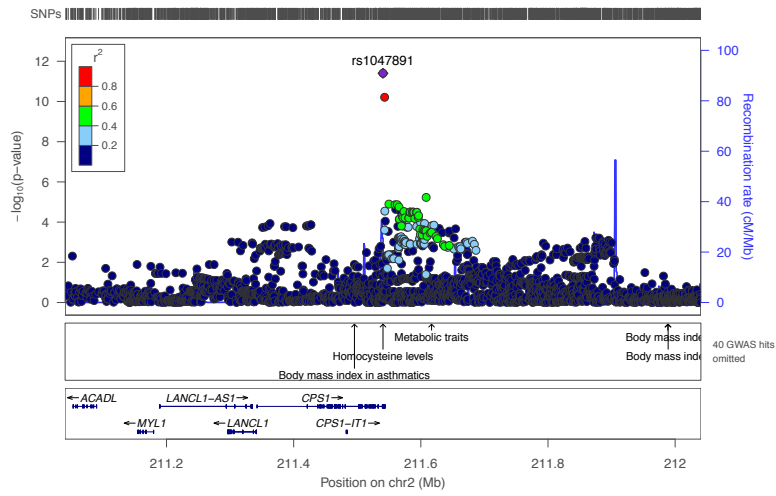

### 3-methylcytidine

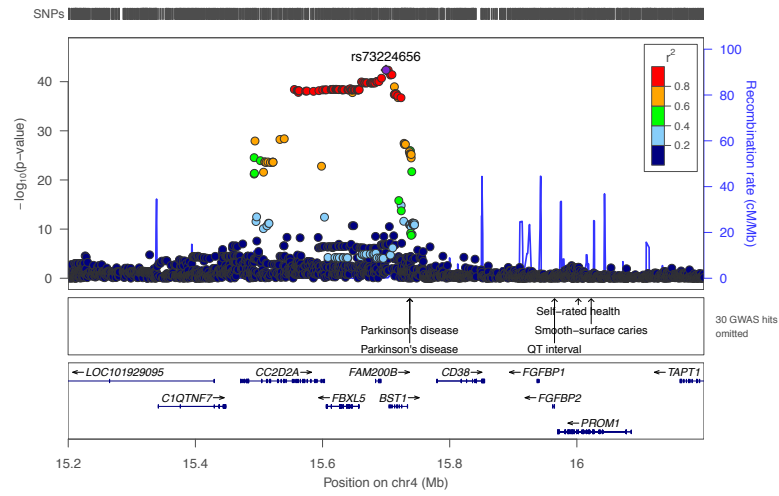

### hexanoylglycine

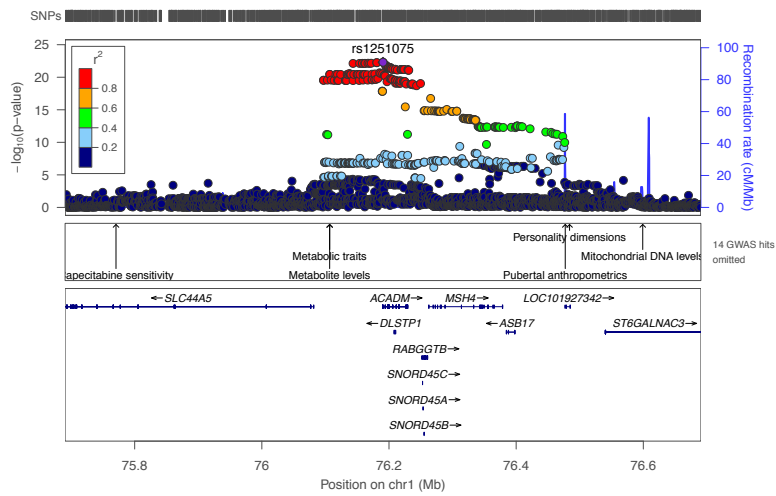

### hexanoylglycine

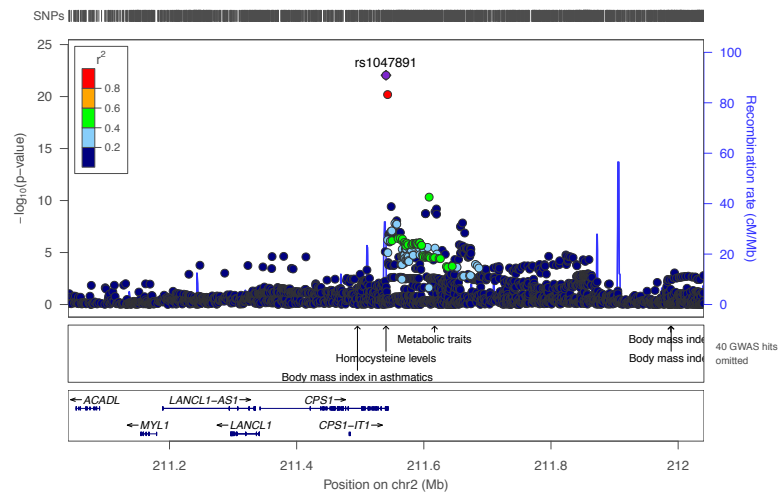

### isobutyrylglycine

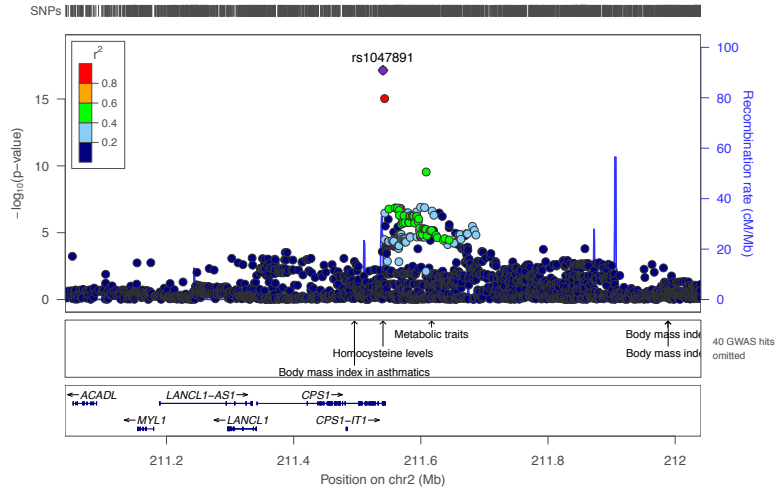

### 2-methylmalonylcarnitine (C4-DC)

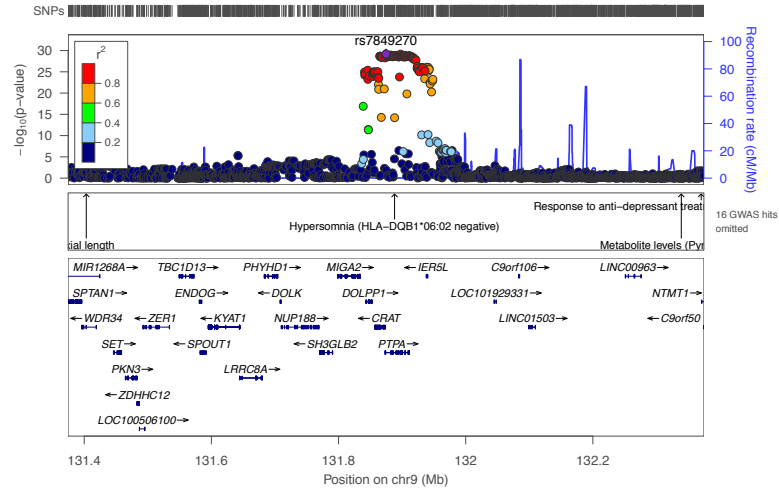

### cysteinylglycine

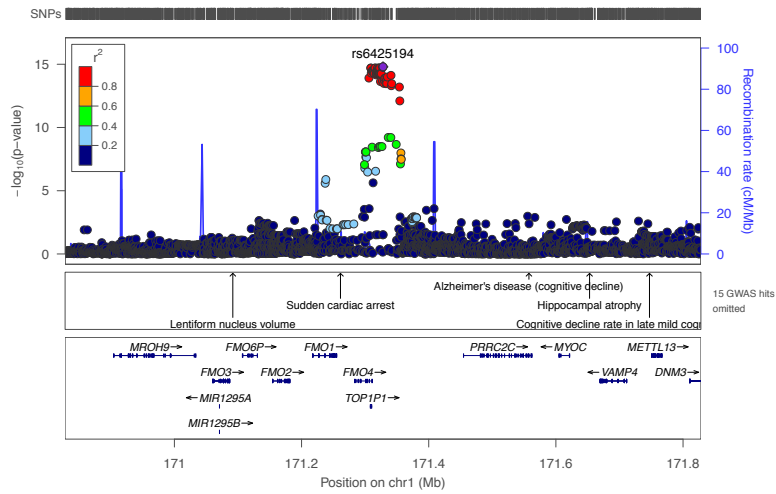

### N-acetyl-aspartyl-glutamate (NAAG)

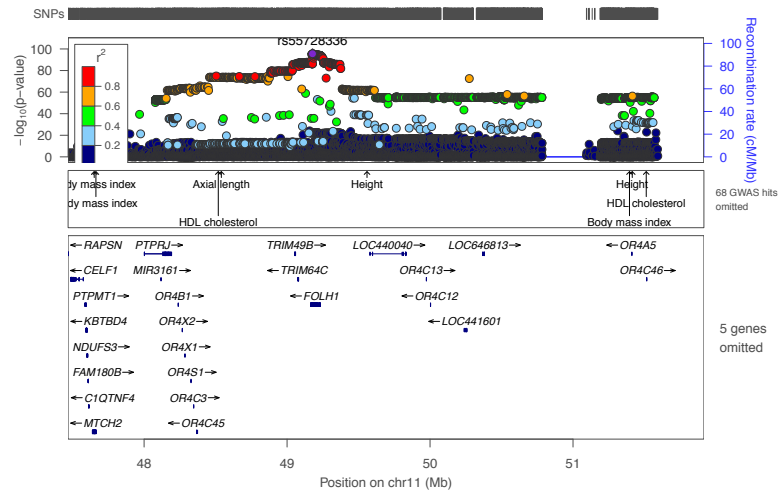

### N-acetyl-aspartyl-glutamate (NAAG)

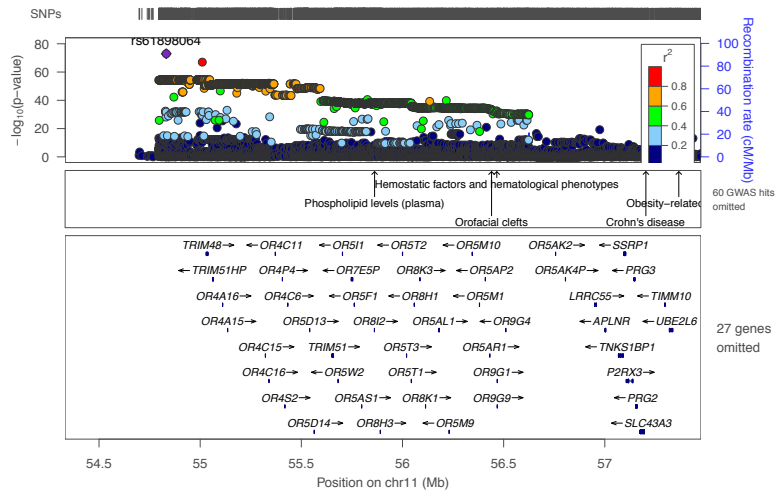

### N2-acetyllysine

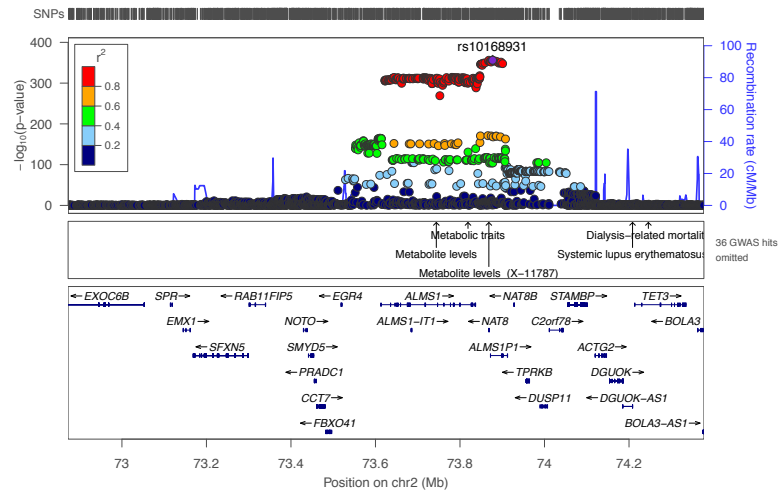

### succinylcarnitine (C4-DC)

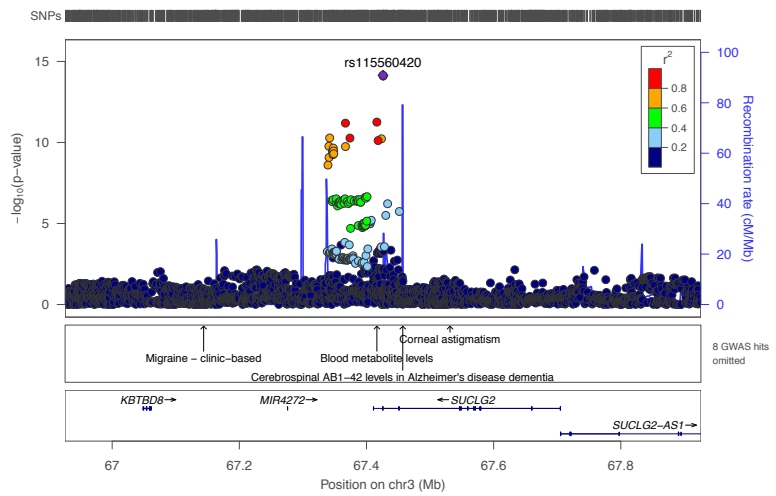

### succinylcarnitine (C4-DC)

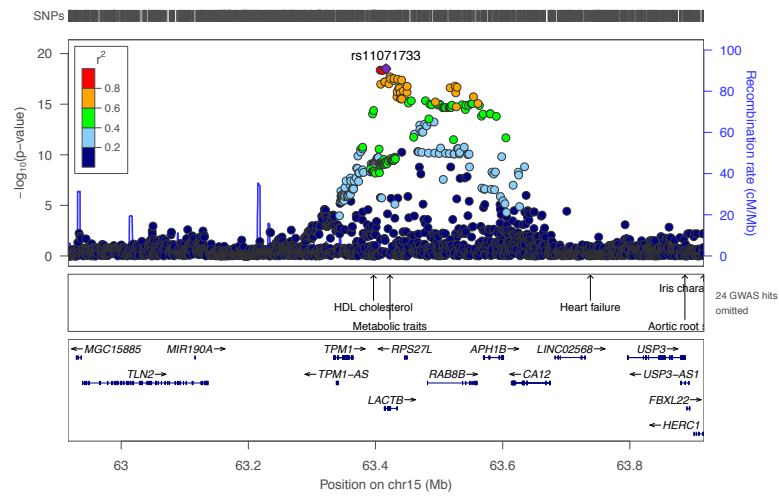

### androstenediol (3beta,17beta) disulfate (1)

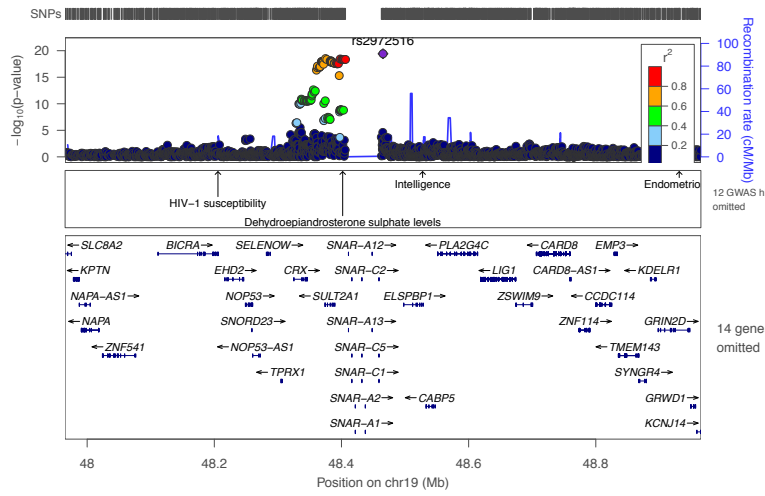

### N6-carboxyethyllysine

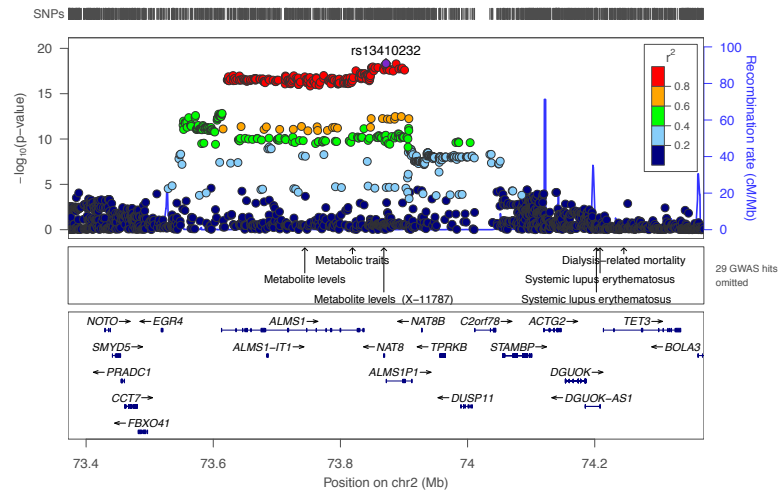

### N-acetylputrescine

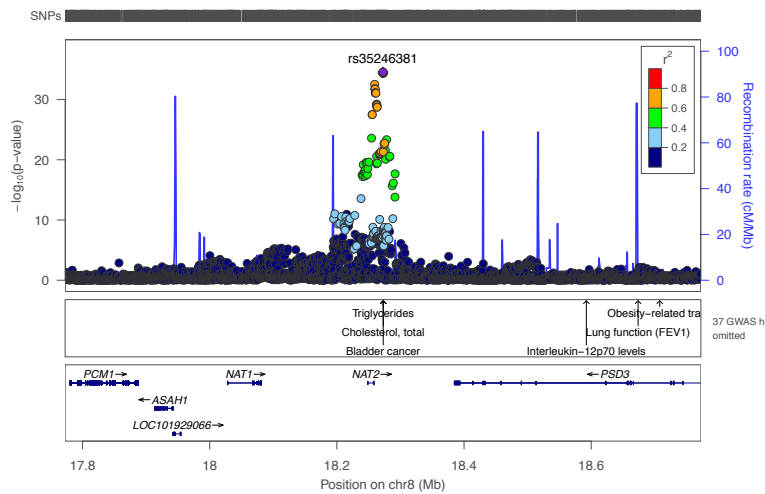

### 11-ketoetiocholanolone sulfate

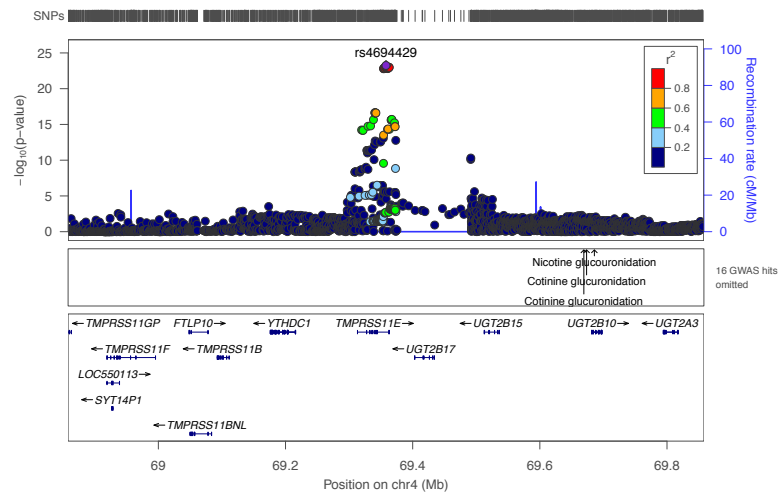



### 11-ketoetiocholanolone sulfate

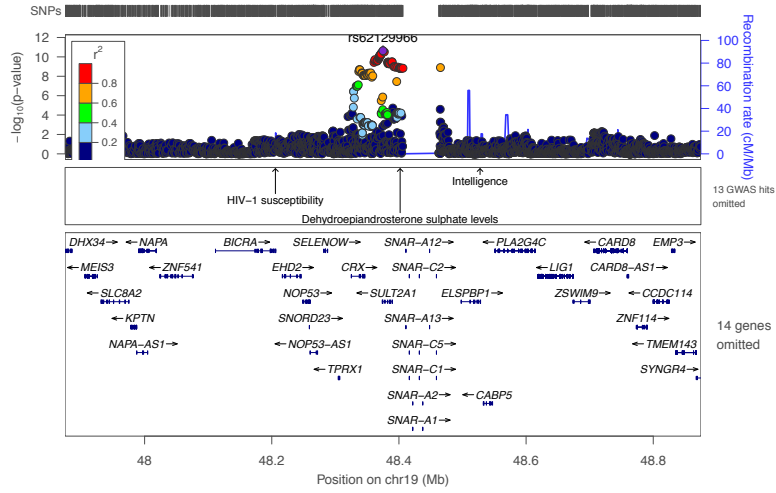

### 16a-hydroxy DHEA 3-sulfate

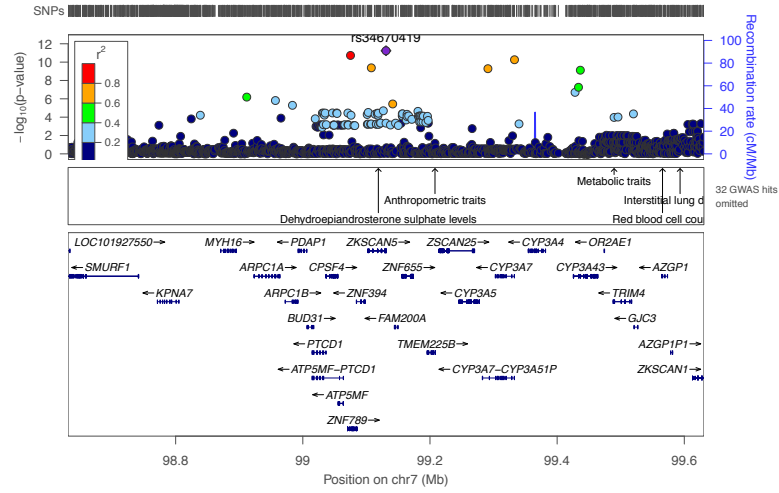

### alpha-CEHC glucuronide\*

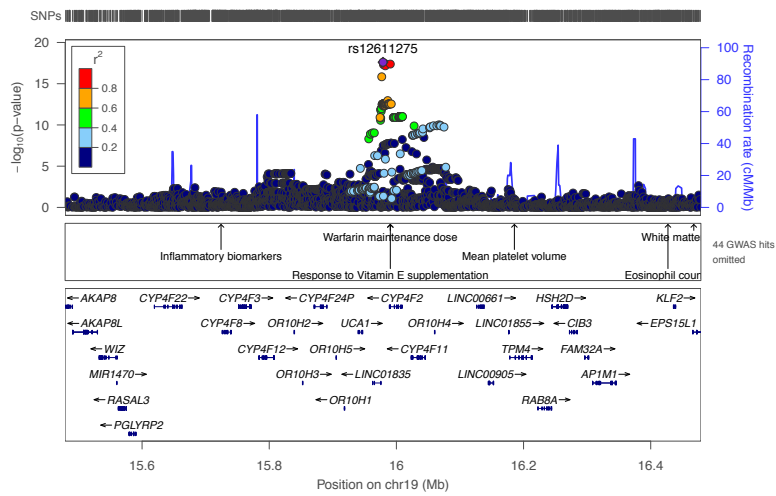

### polyglycine

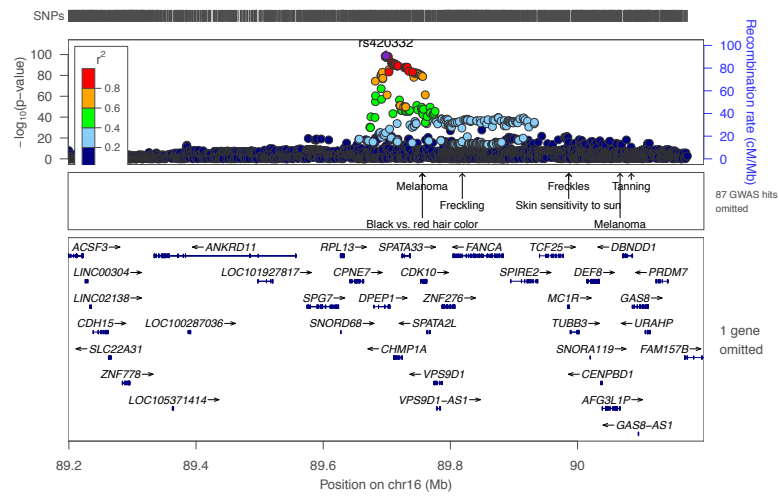

### pregnanediol-3-glucuronide

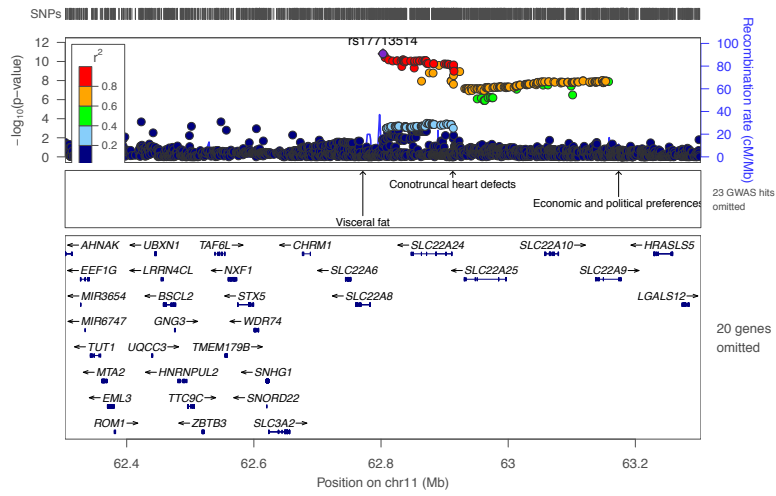

### indoleacetylglutamine

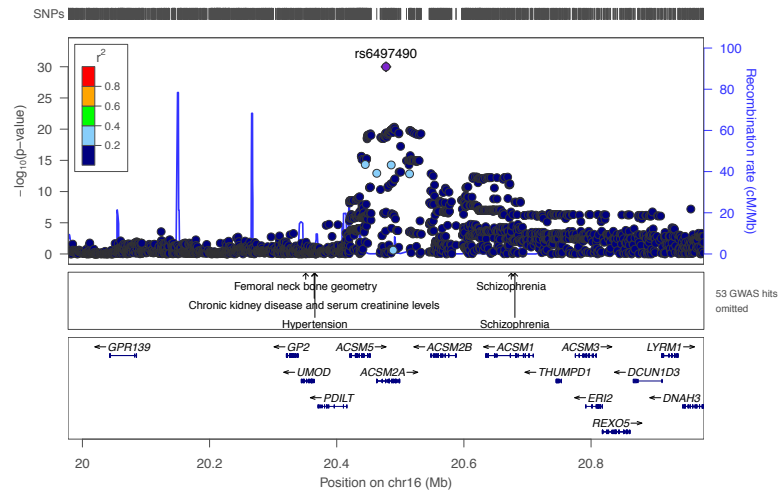

### gamma-CEHC glucuronide\*

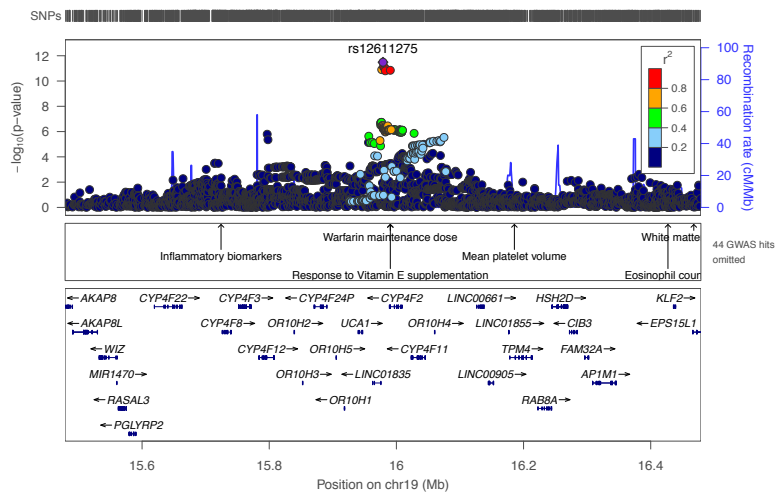

### dimethylmalonic acid

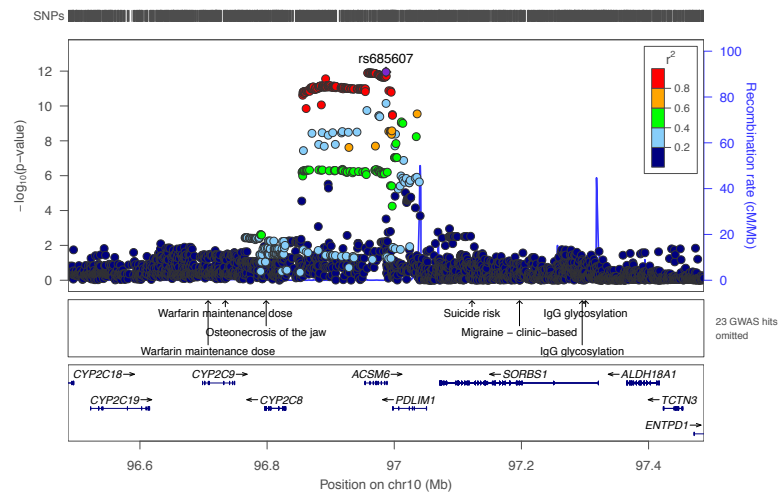

### dimethylmalonic acid

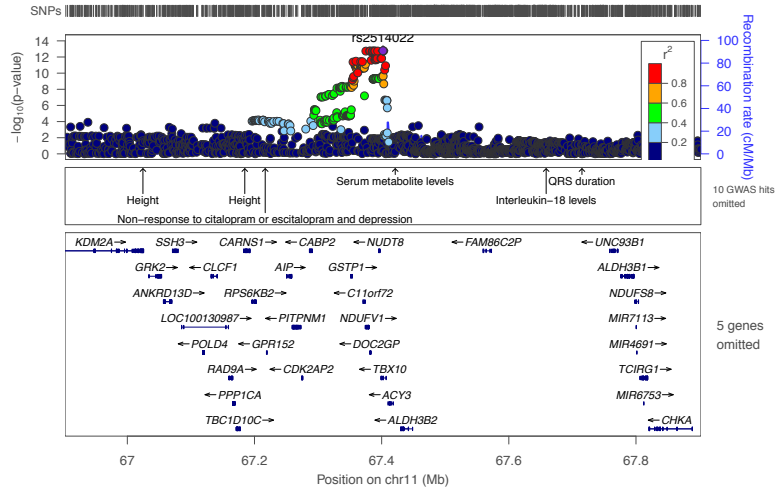

### pterin

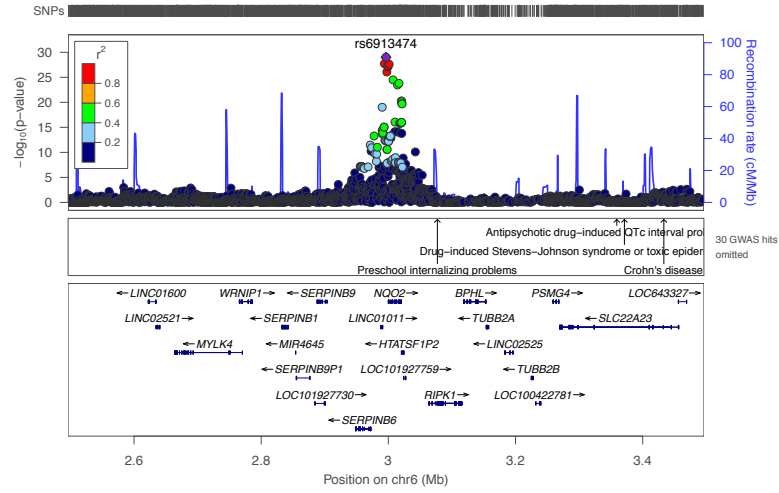

### N-delta-acetylornithine

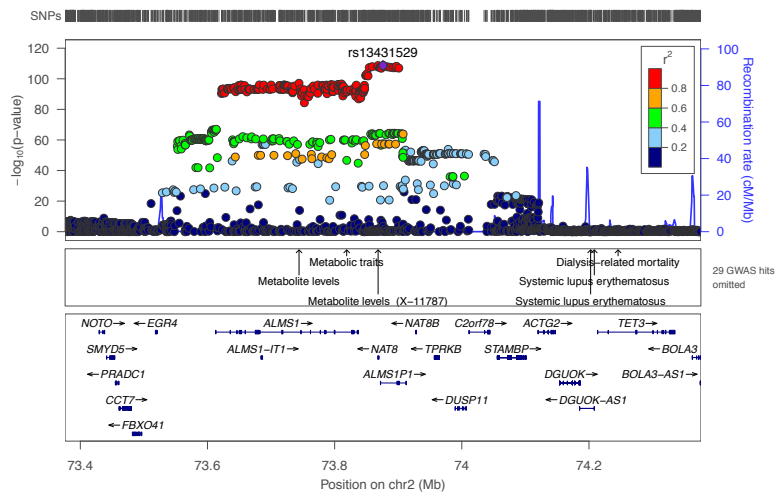

### N-acetyl-1-methylhistidine\*

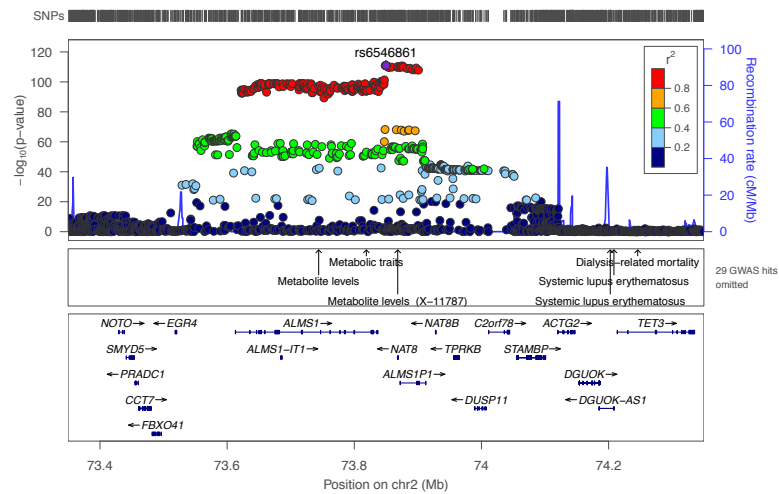

### N-acetyl-3-methylhistidine\*

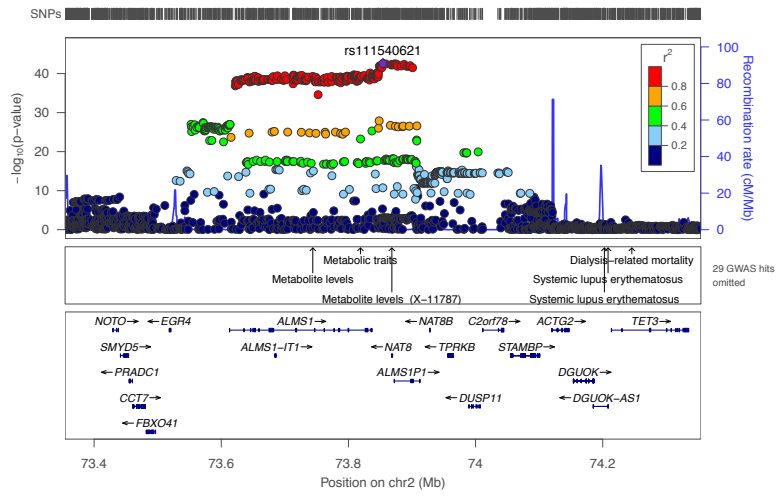

### N-formylanthranilic acid

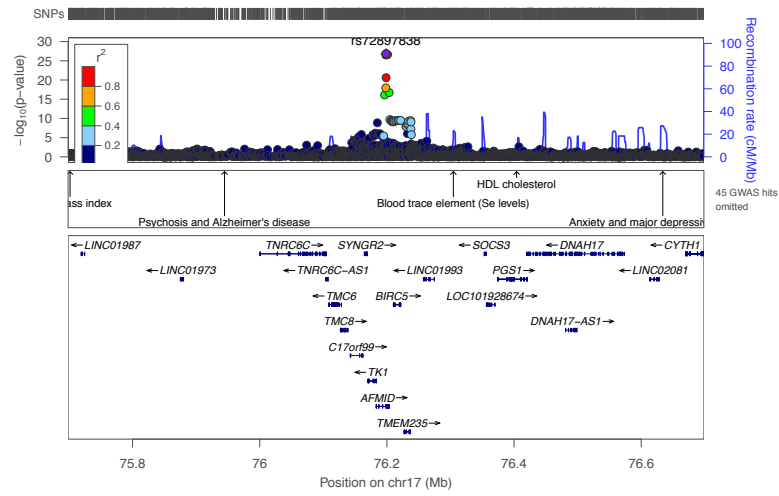

### 1-methylhistamine

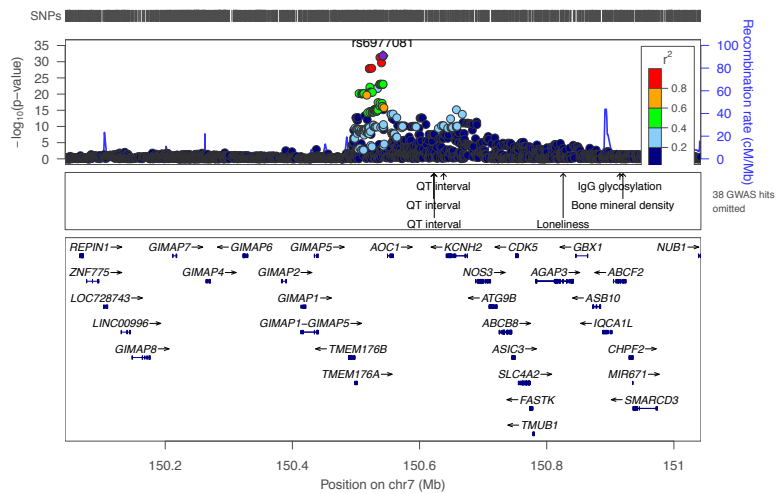

### O-sulfo-L-tyrosine

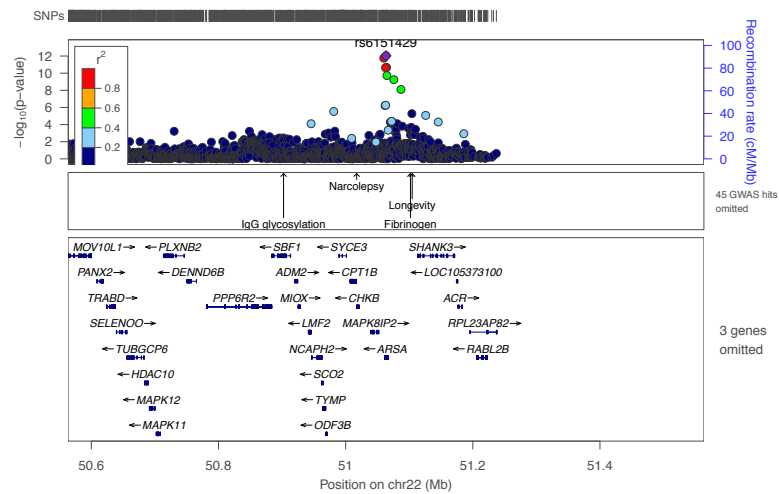



### X – 15497 – retired for 1-carboxyethylphenylalanine

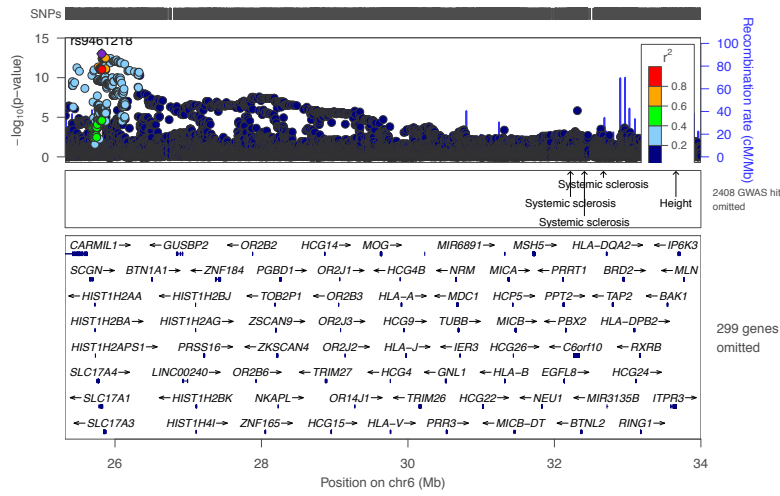

### X – 21467

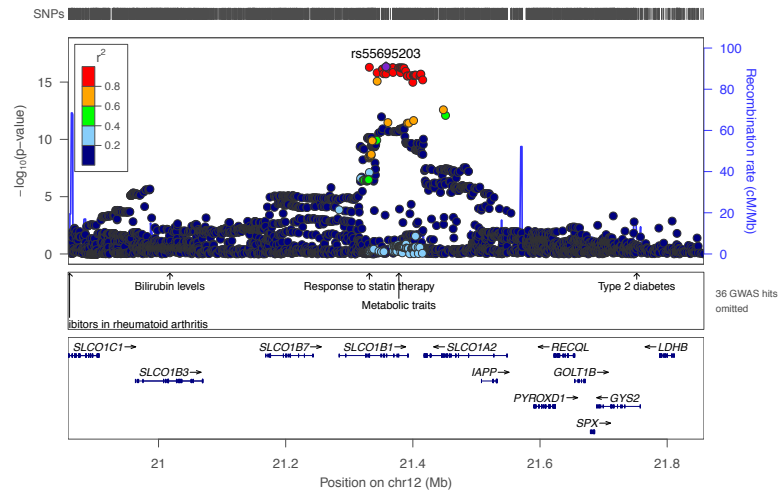

### X – 21470

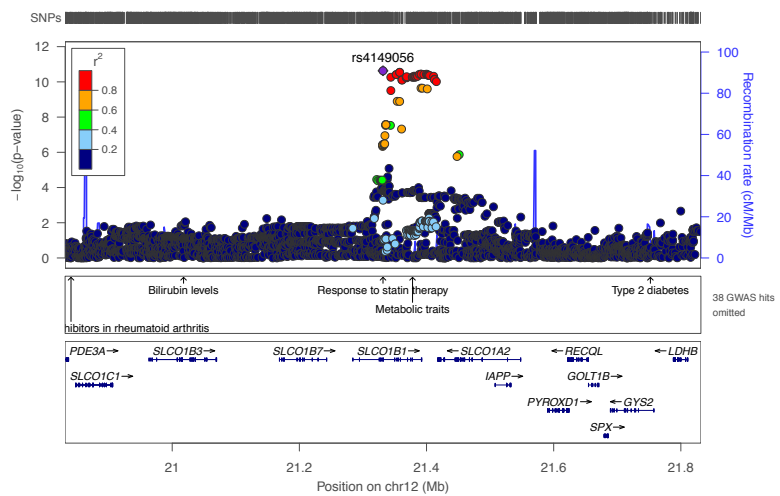

### X – 21470

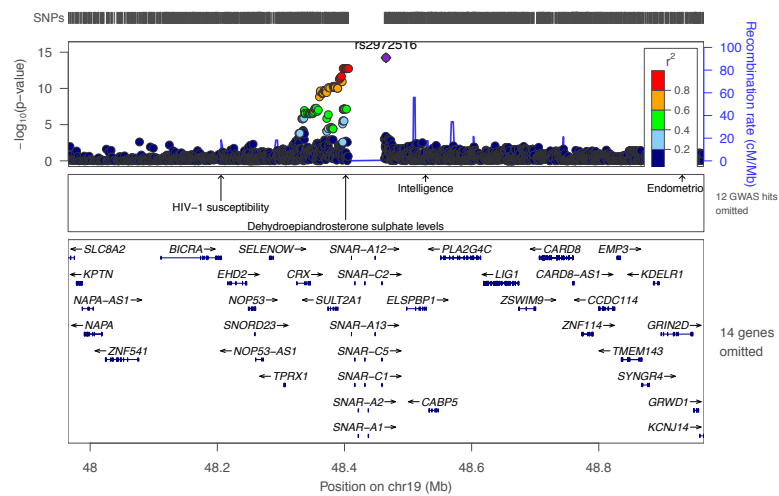

### N-acetylglucosamine/N-acetylgalactosamine

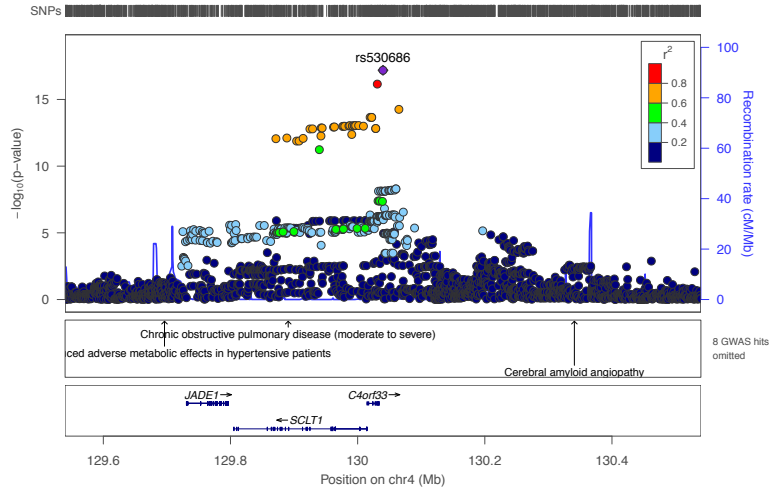

### N-acetylglucosamine/N-acetylgalactosamine

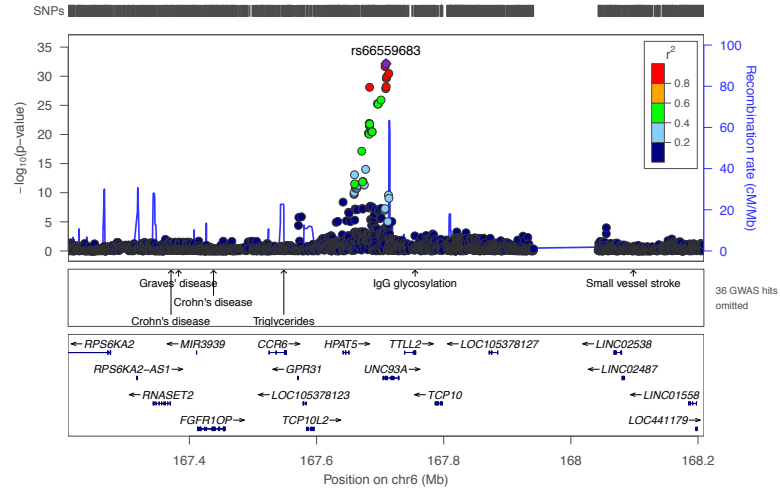

### 3-methylglutaryl carnitine (2)

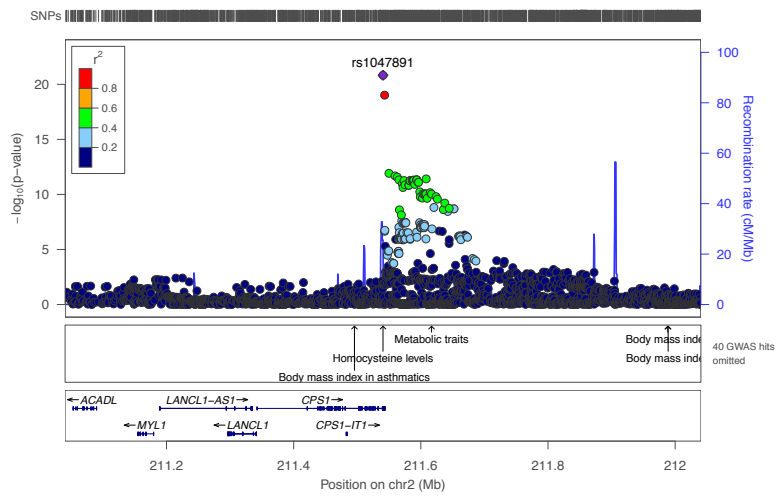

### 3-methylglutaryl carnitine (2)

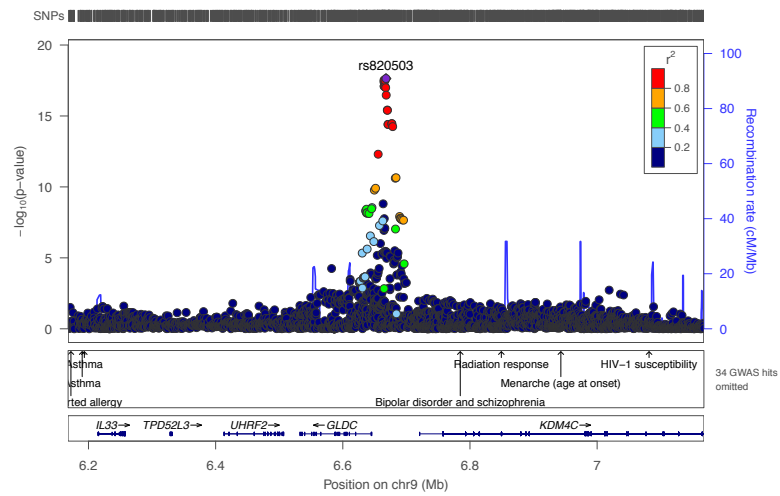

X - 11440

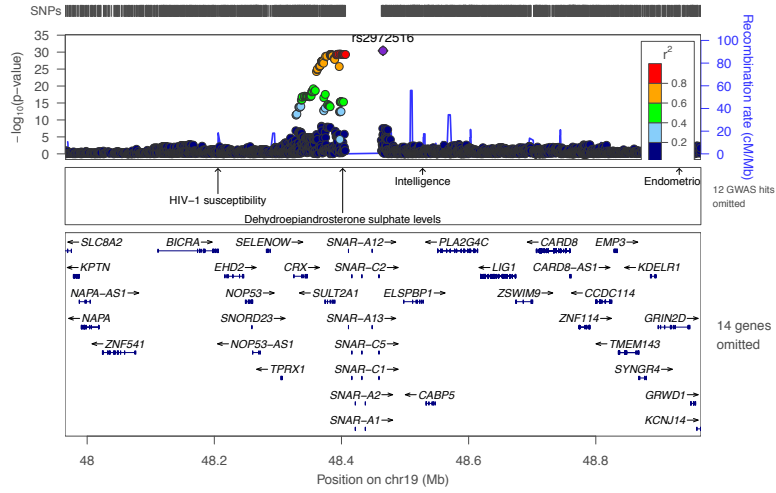

X - 14662

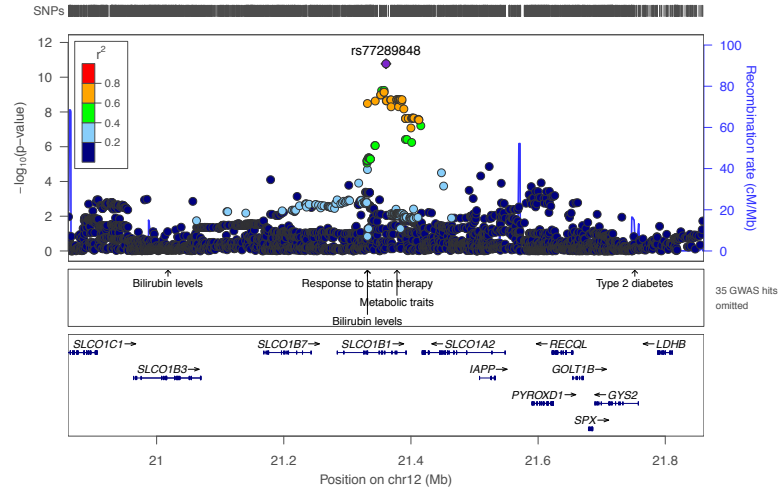

X - 16654

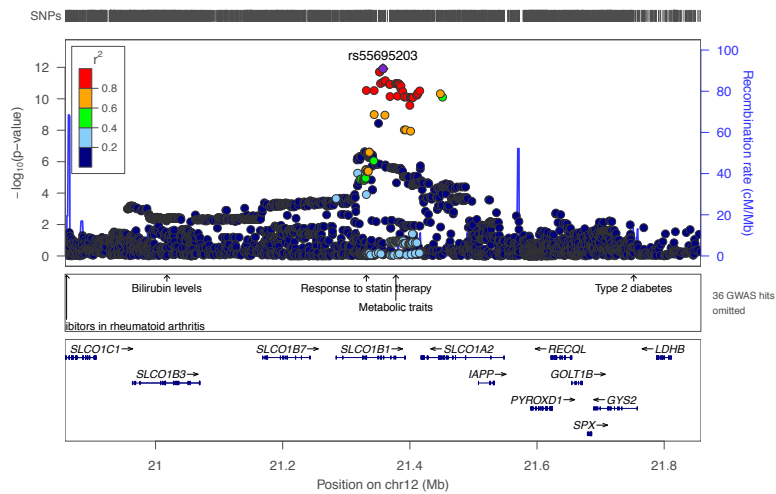

X - 12093

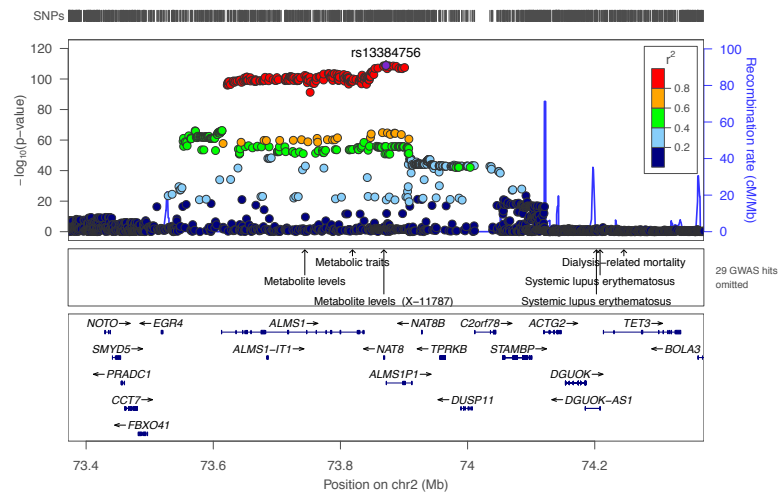



### X - 12093

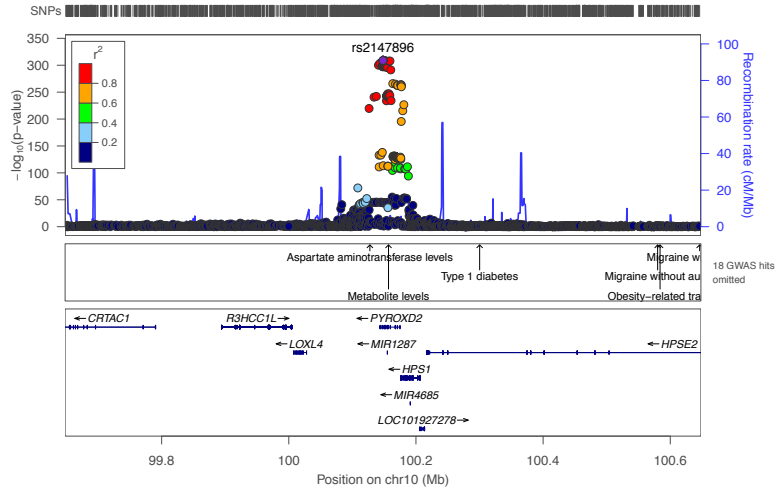

### X - 19141

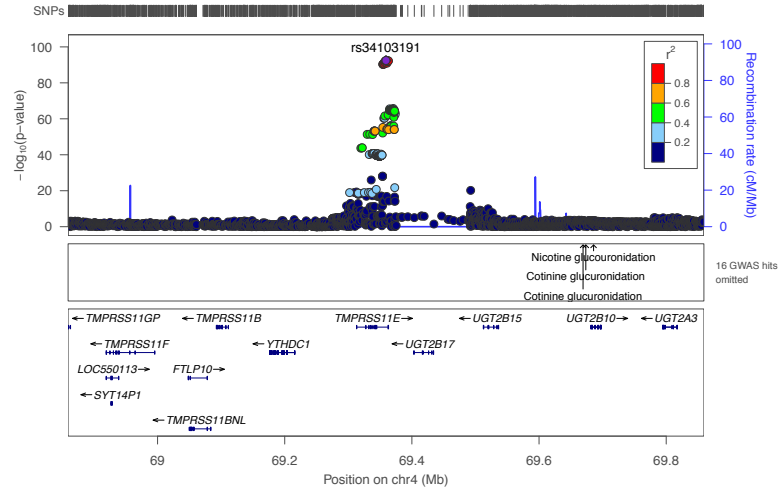

### X - 21785

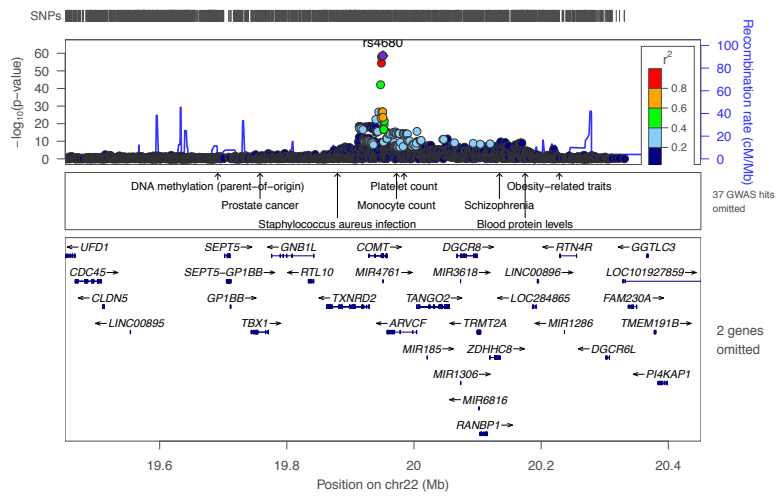

### X - 21792

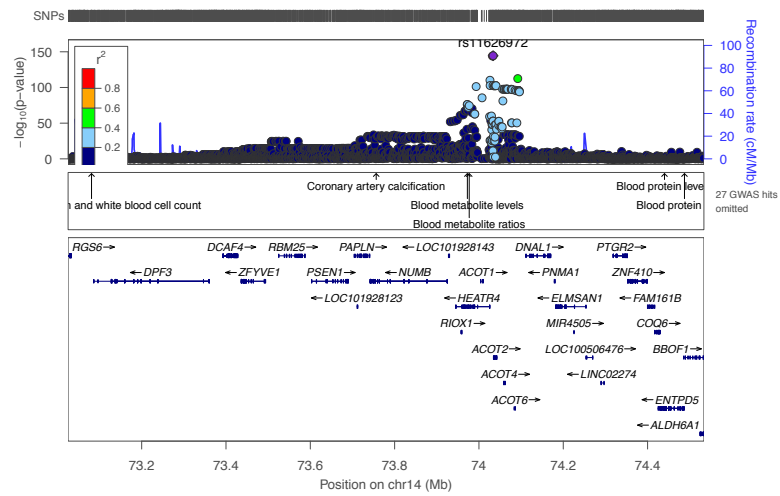

### X - 21796

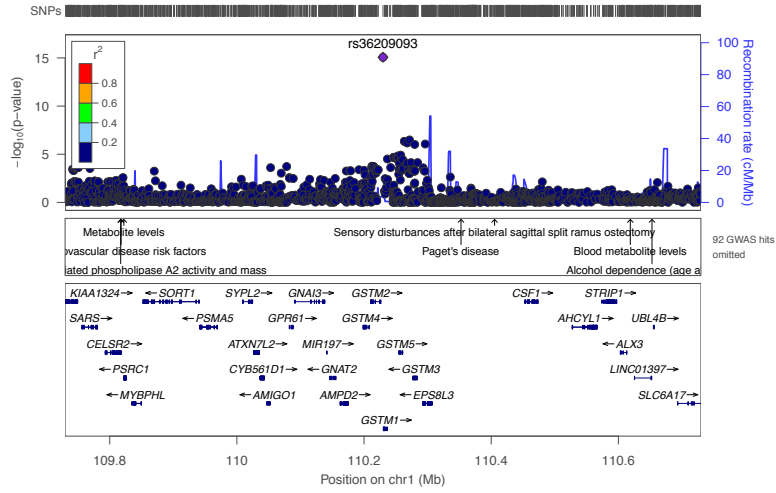

### X - 12379

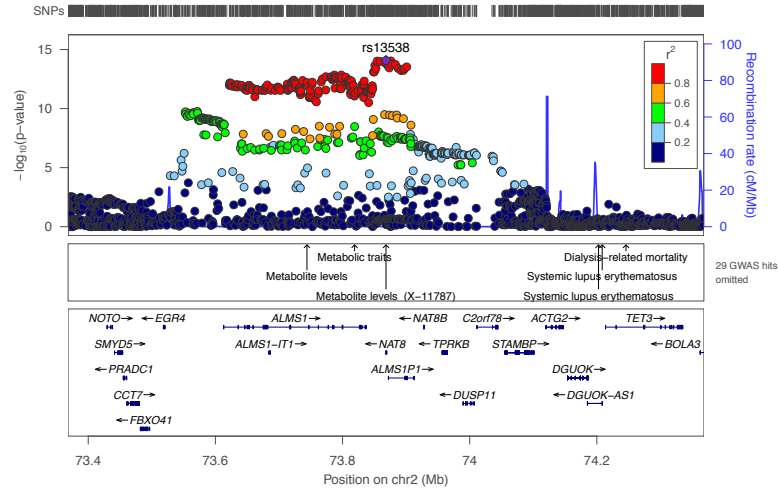

### X - 12822

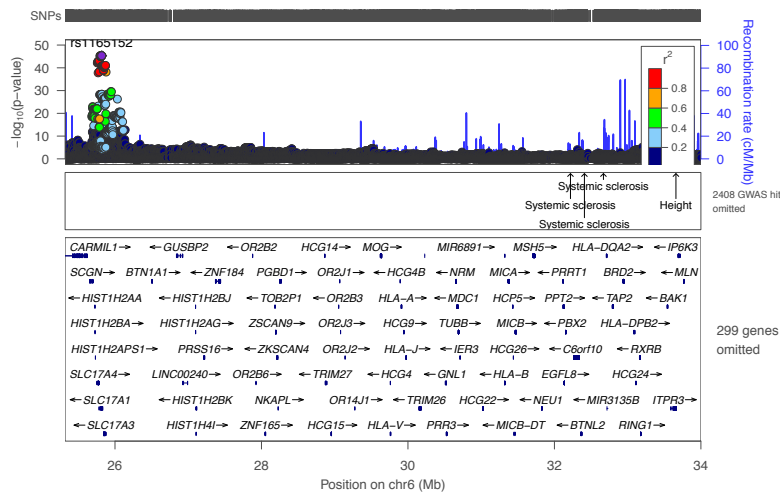

### X - 21827

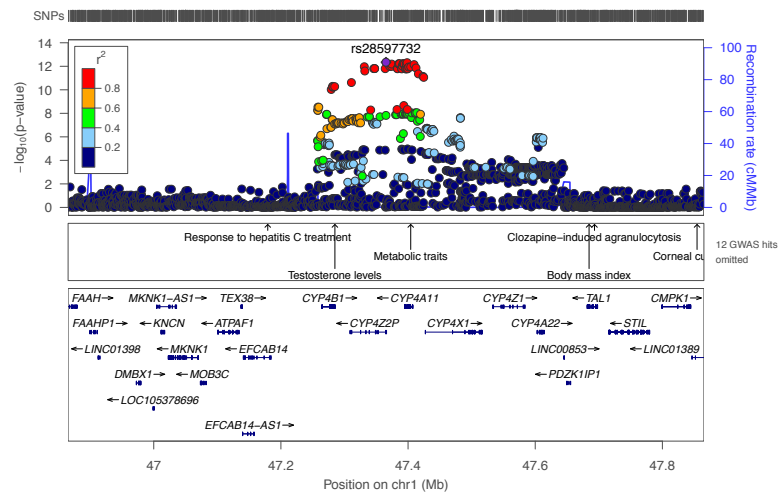

X - 21829

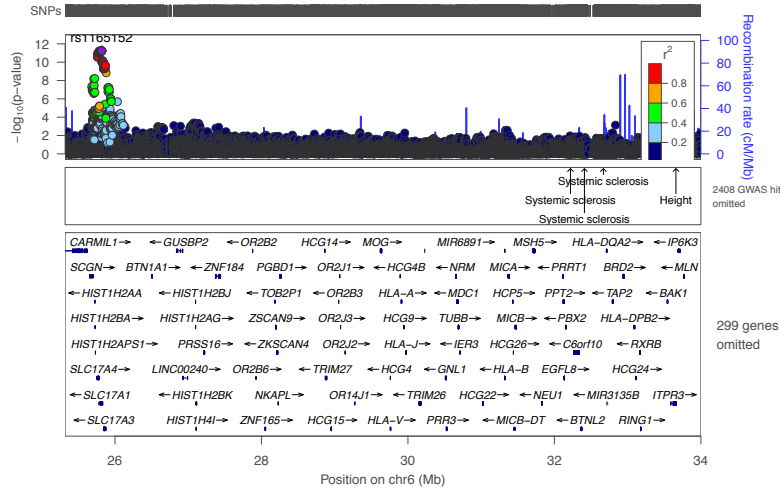

X - 12839

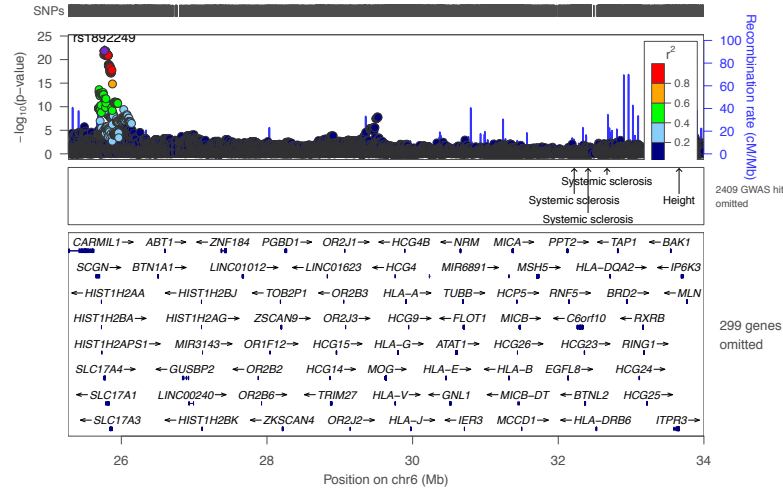

X - 21842

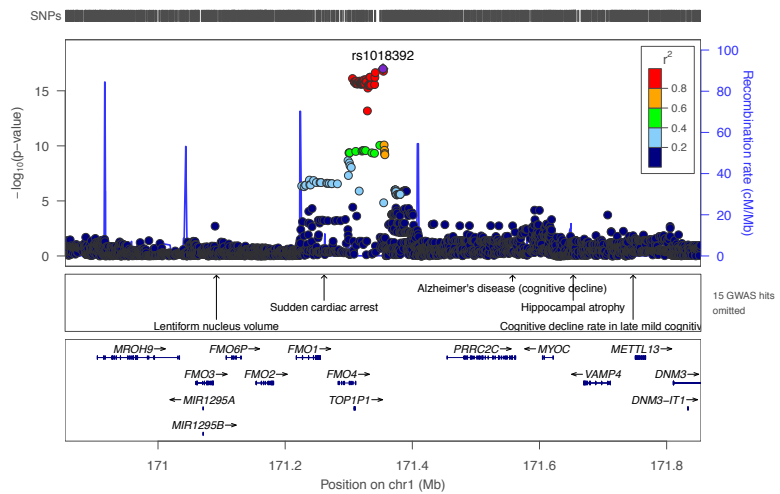

N-methylpipecolate

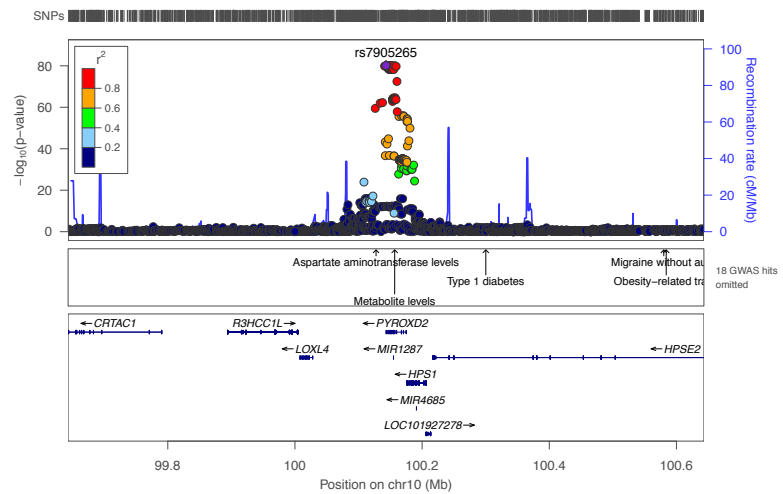

### ferulic acid 4-sulfate

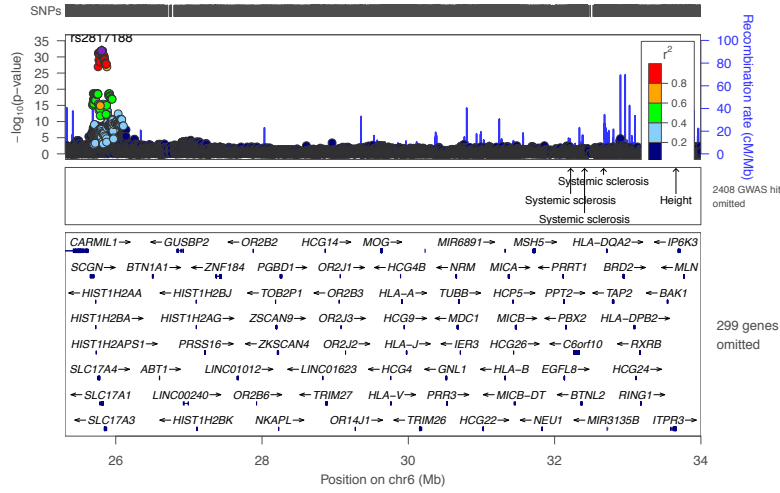

### X – 1889 – retired for 1-carboxyethylleucine

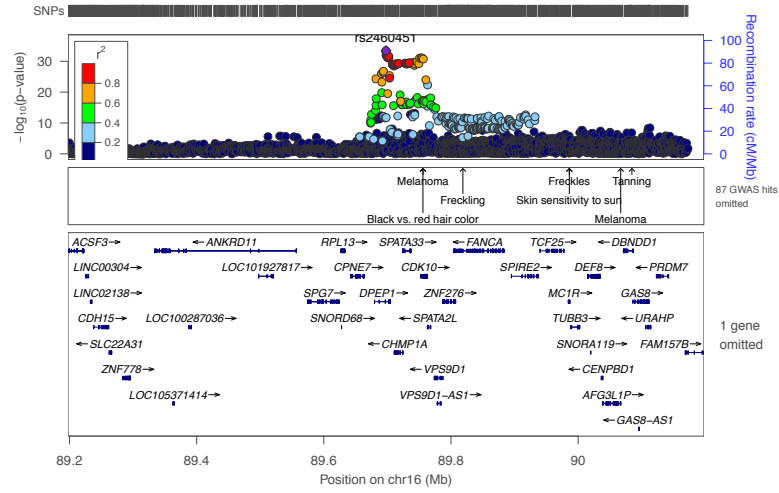

### X – 19913

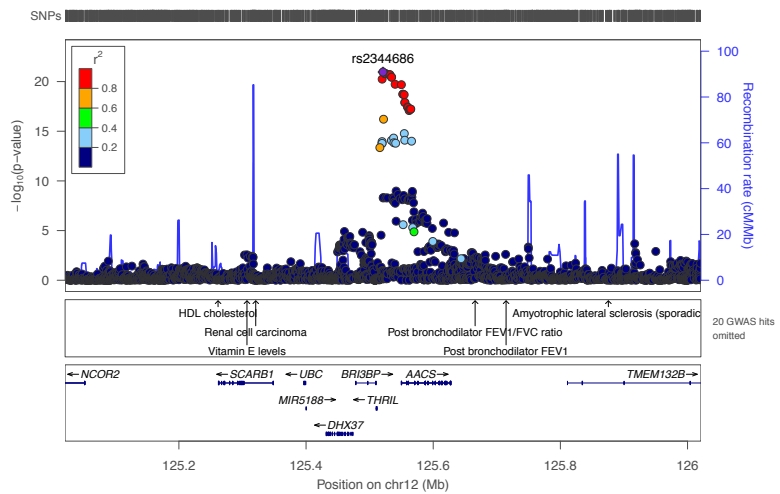

### 17alpha-hydroxypregnanolone glucuronide

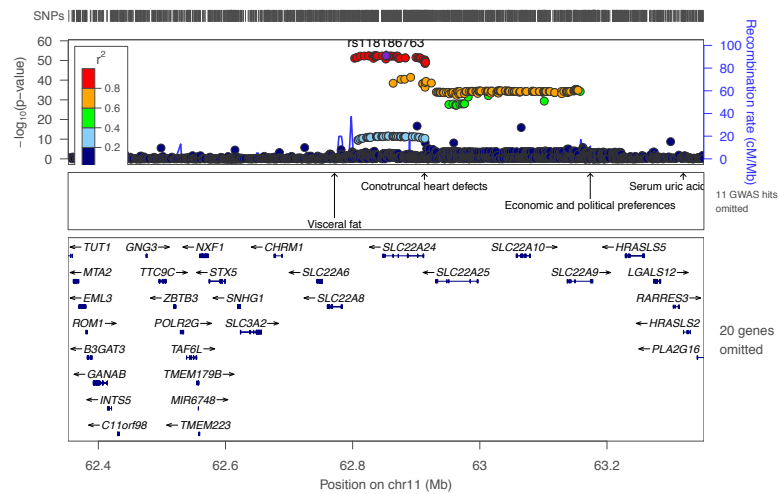

### X – 22162

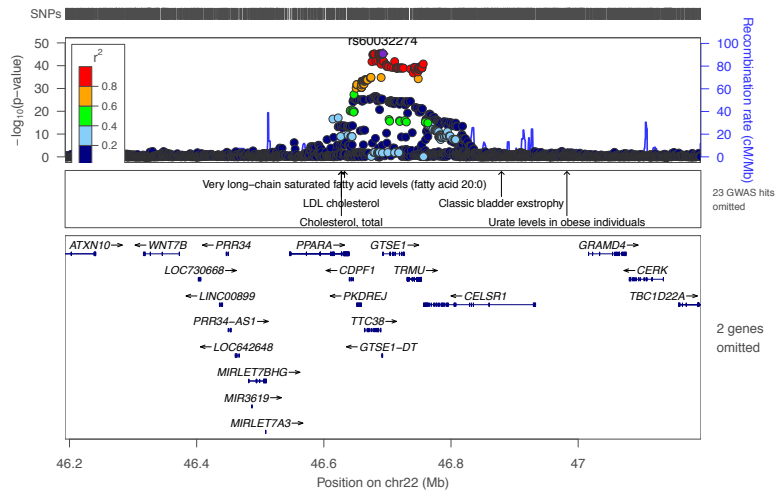

### X – 19561 – retired for 1-carboxyethyltyrosine

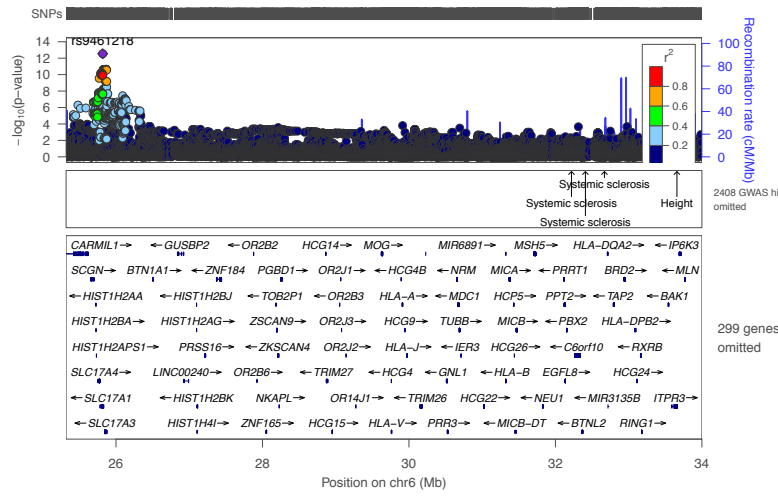

### X – 10457

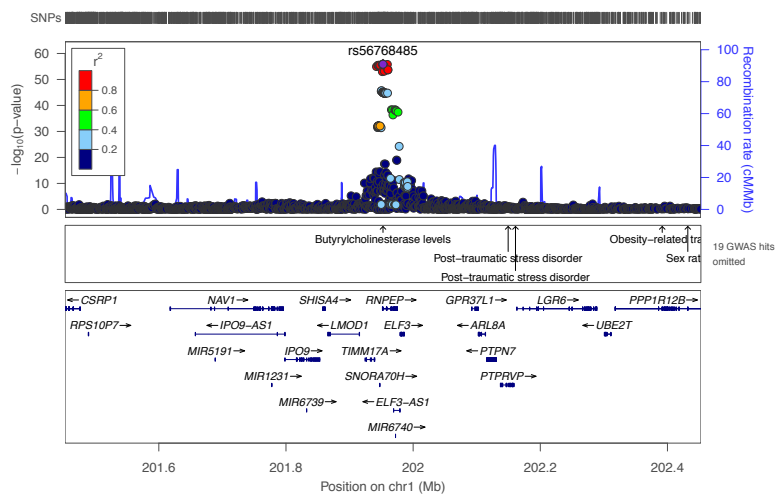

### X – 12125

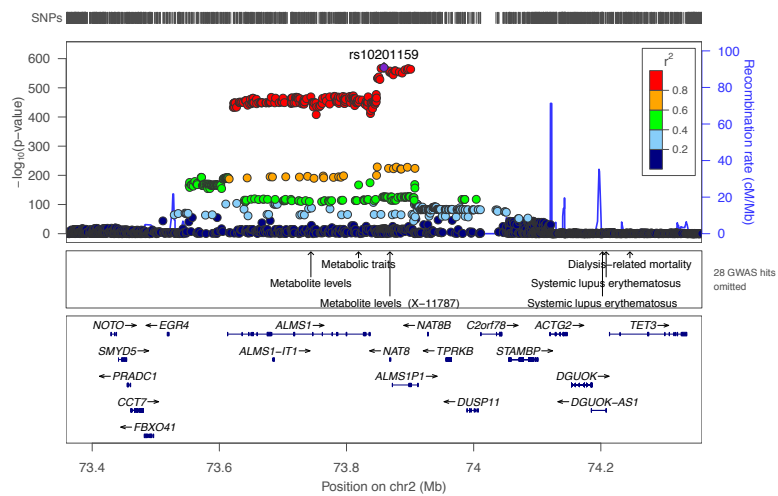

alpha-CEHC sulfate

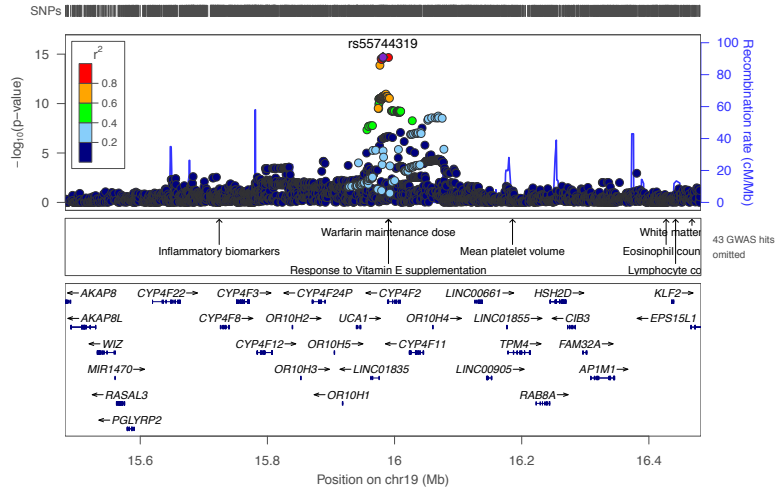

X - 12097

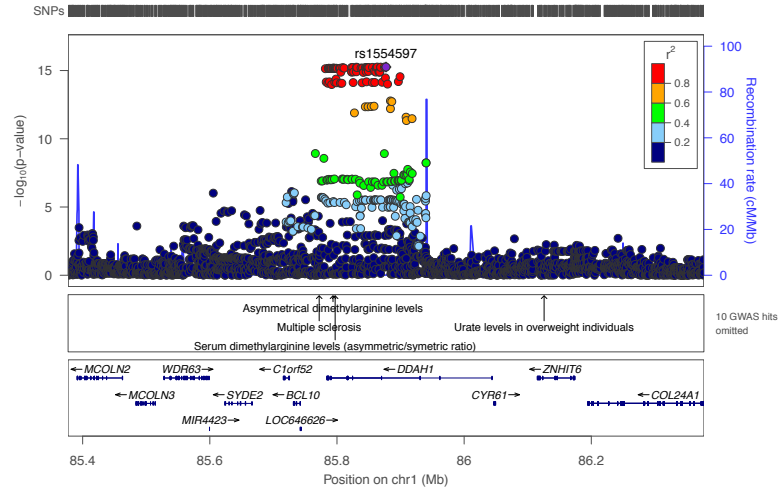

X - 12097

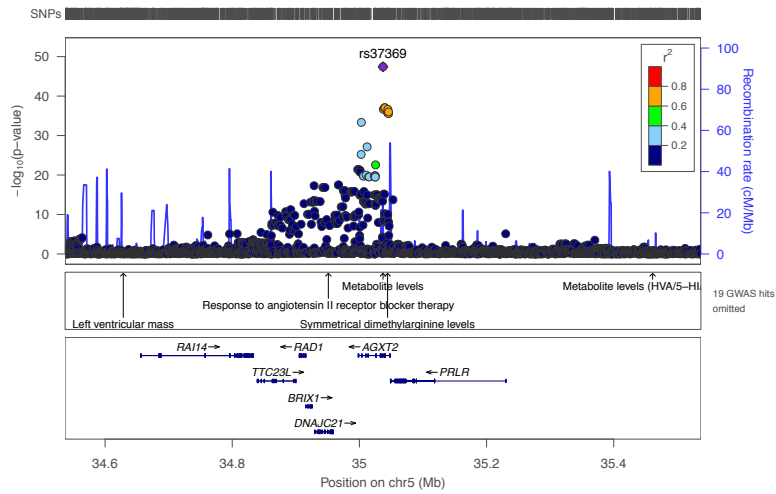

X - 12096

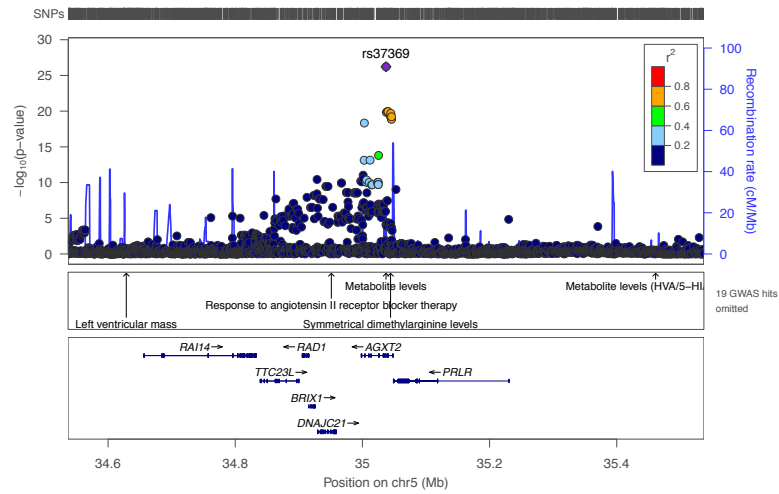

### X - 12112

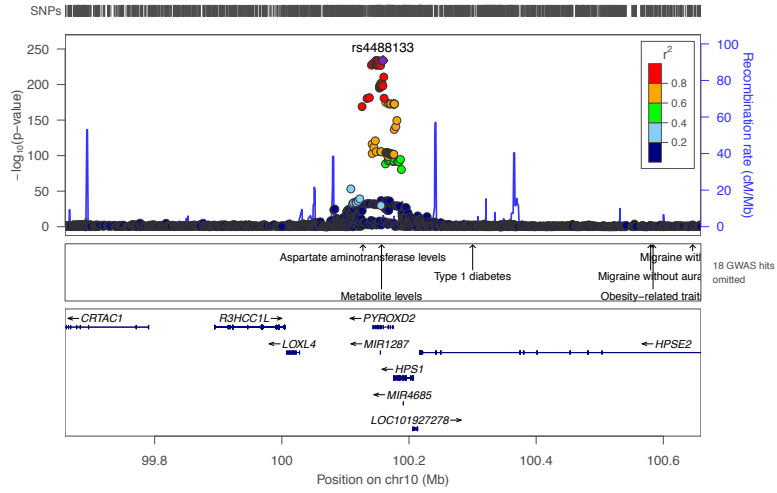

### X - 12117

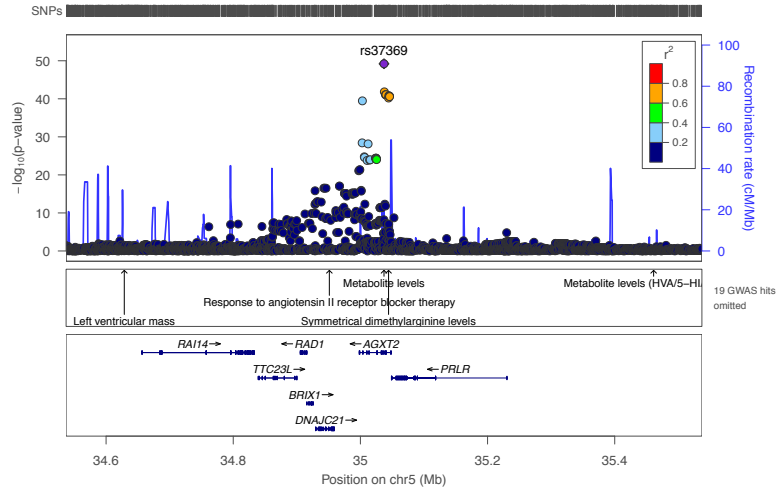

### X - 12124

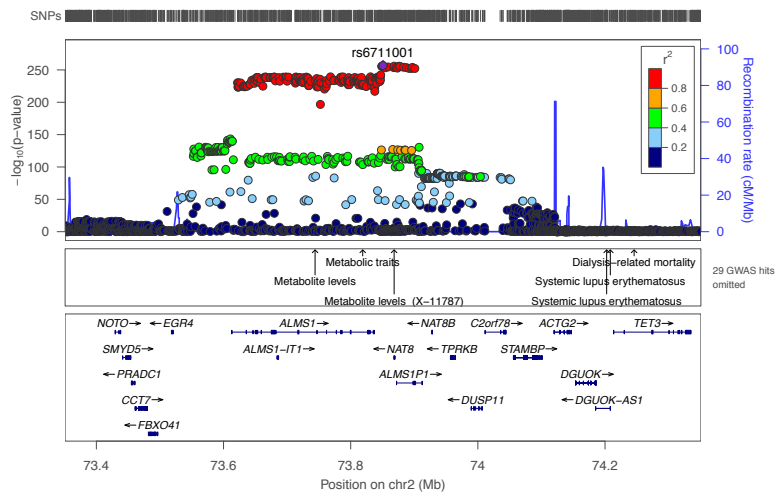

### X - 13431

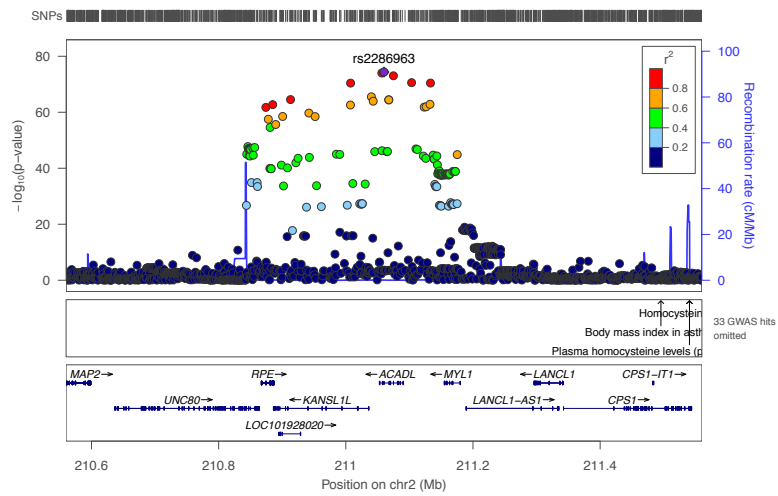

X - 15666

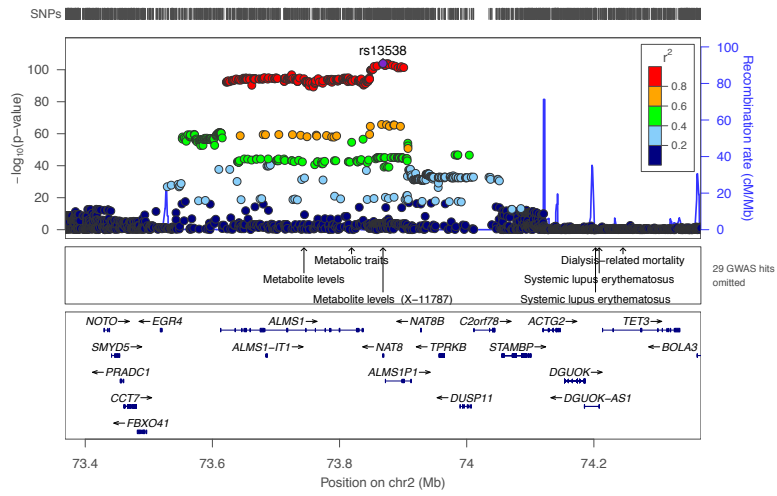

X - 17323

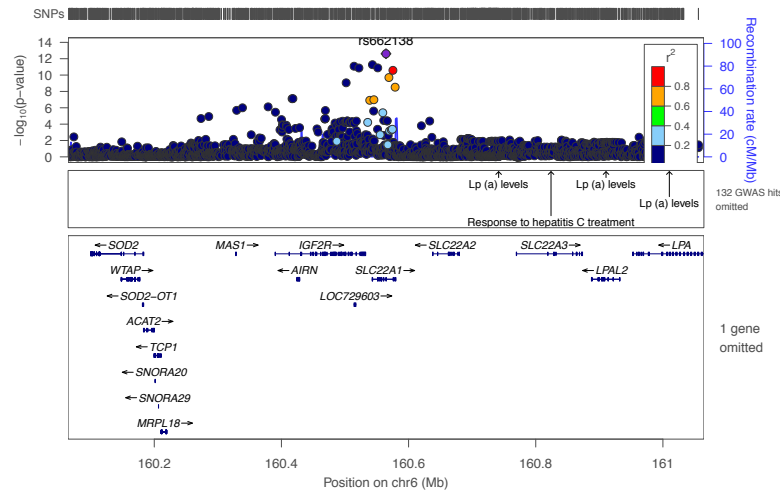

X - 11357

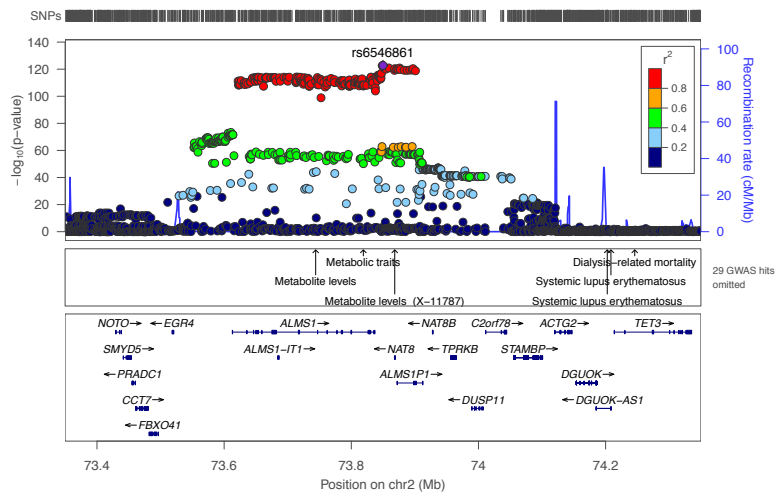

X - 12410

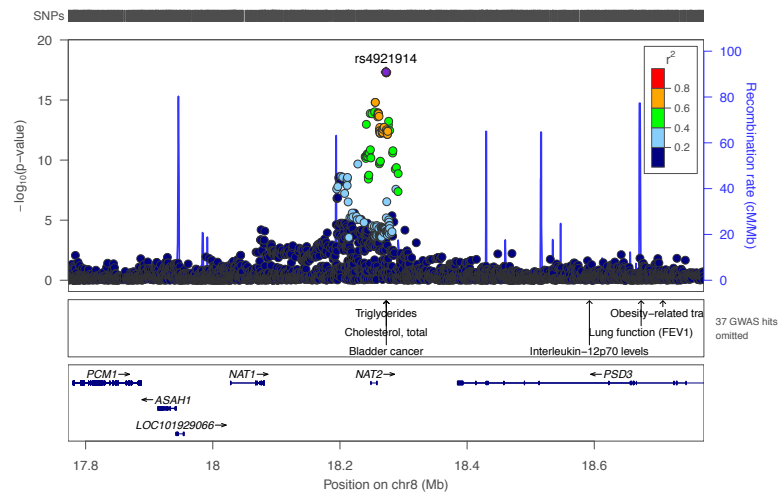



X – 12636

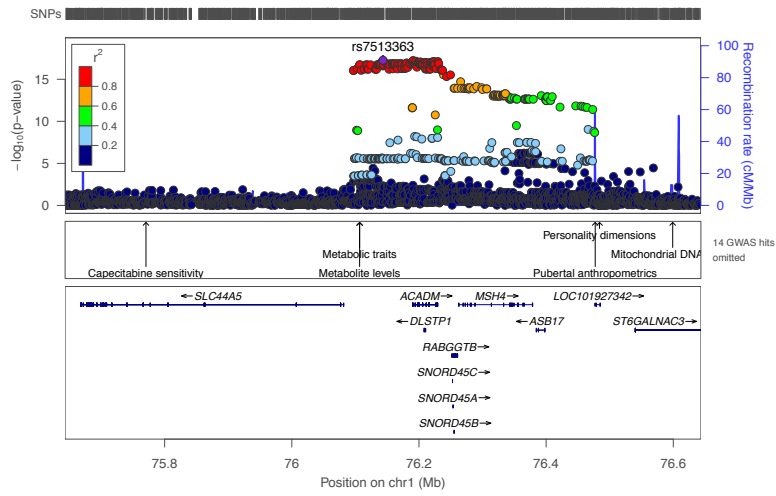

X – 12707

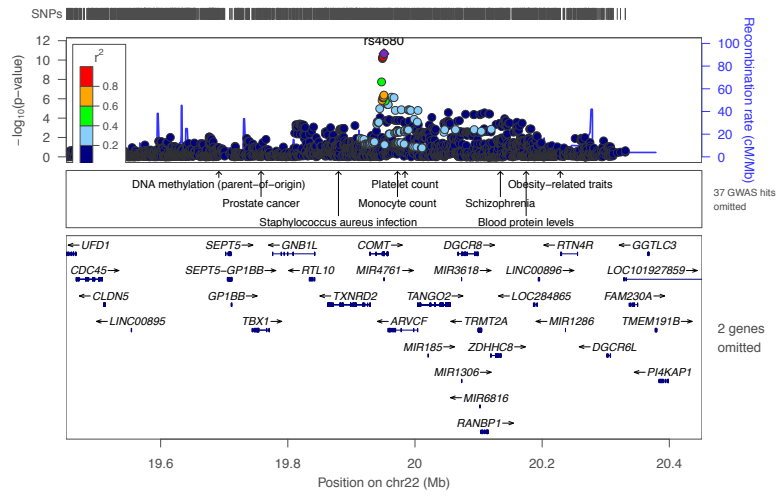

X – 12708

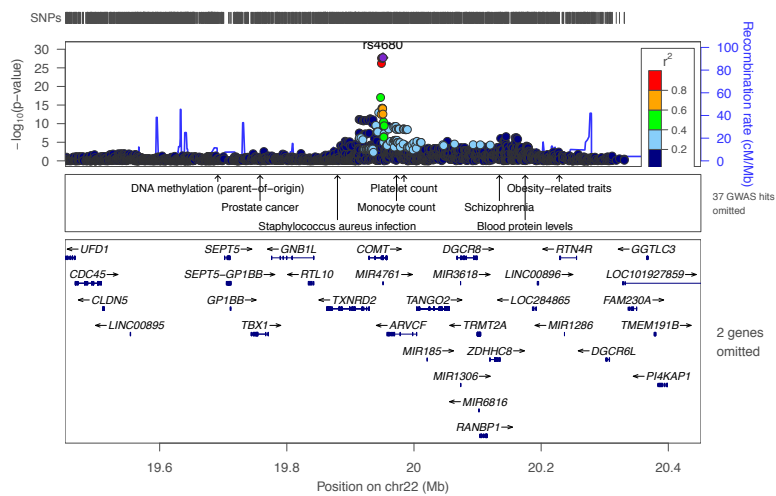

X – 13688

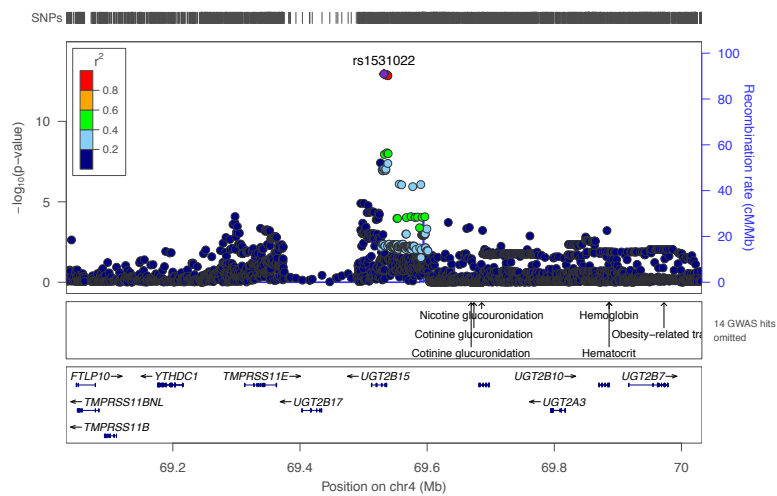

### X - 13847

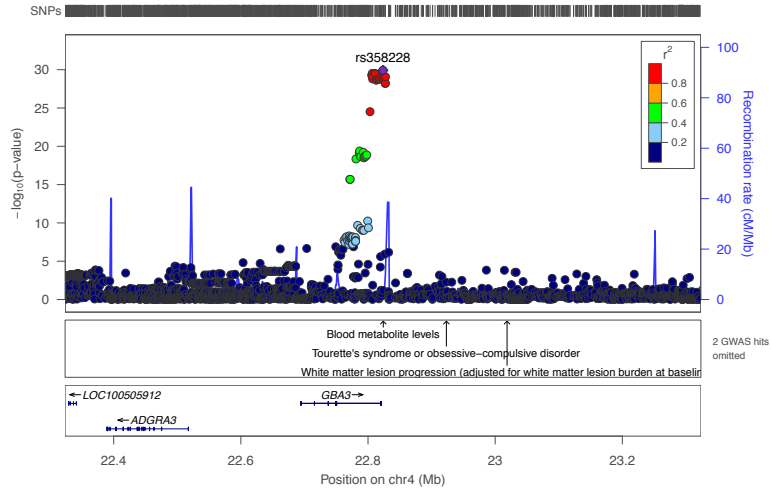

### X - 16087

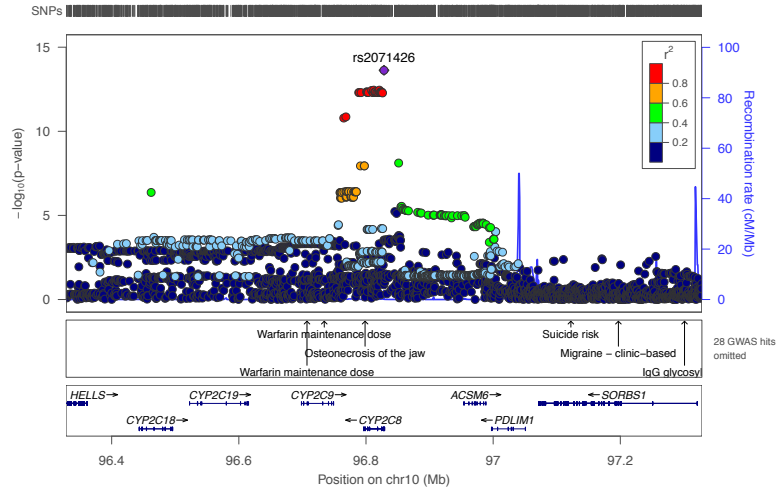

### X - 16567

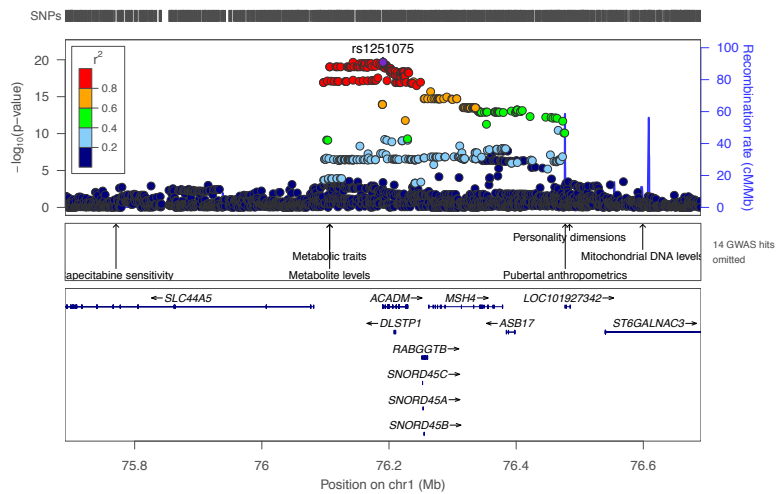

### X - 16567

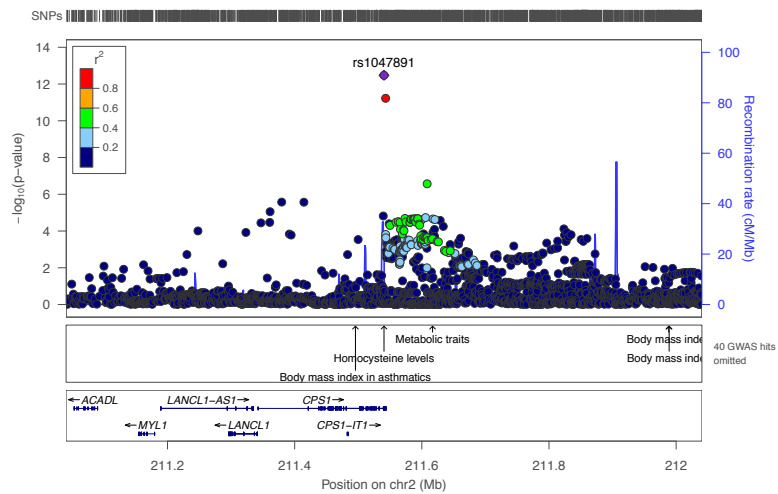

### X - 18888

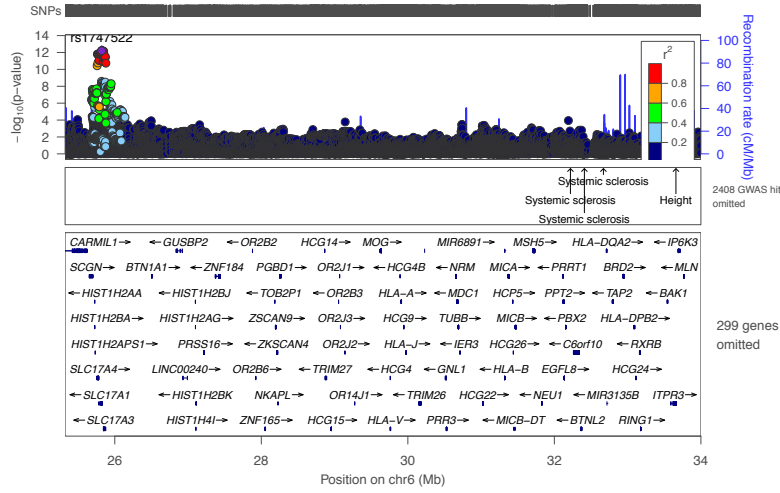

### X - 18938

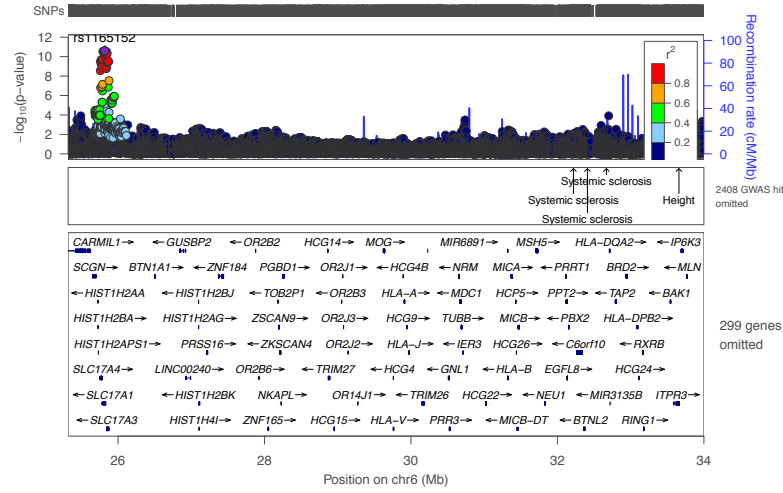

### N-acetylglucosaminylasparagine

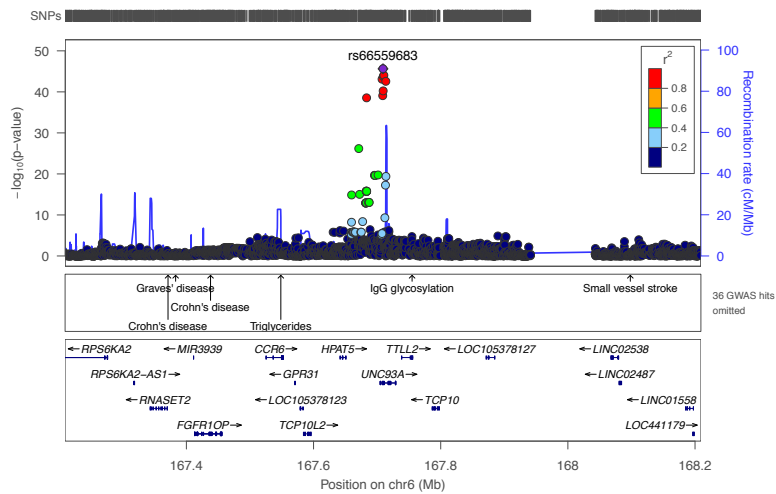

### mannose

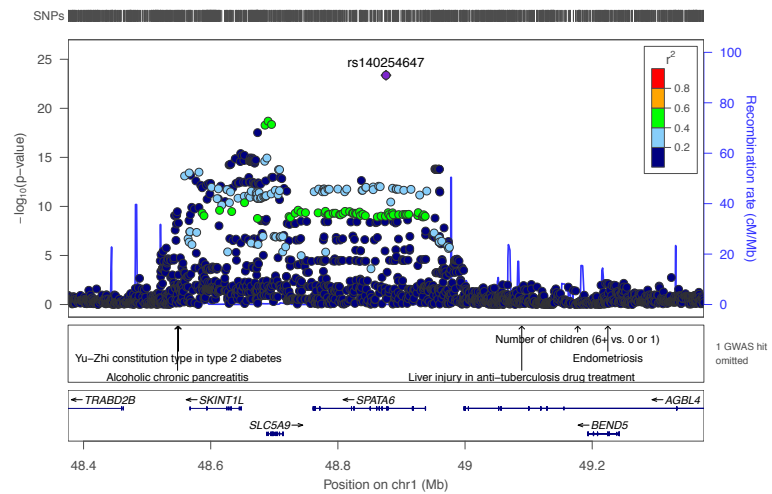

### X - 22834

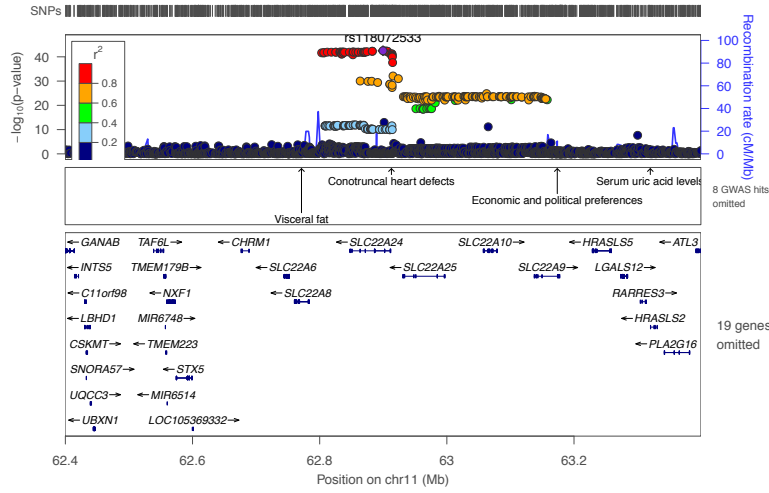

### 3-hydroxyindolin-2-one sulfate

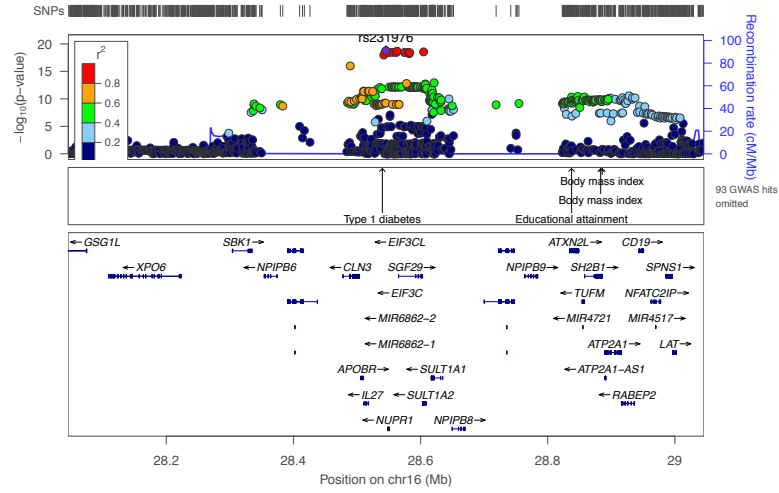

### N-acetylcitrulline

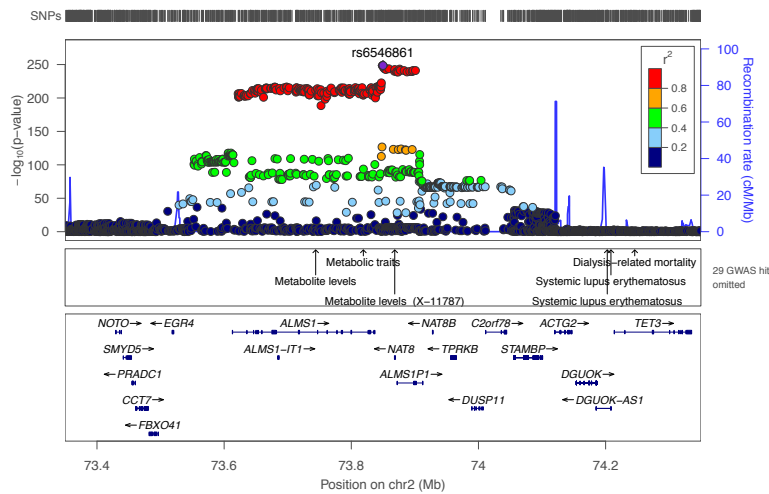

### N-acetylpyralline

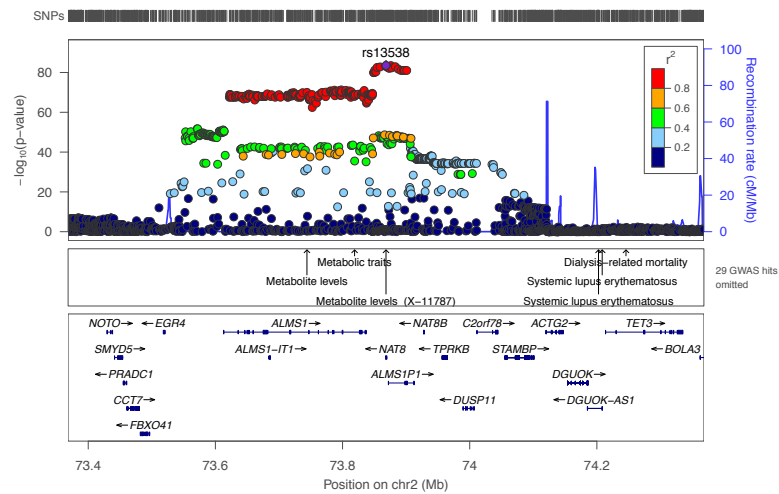

### N2,N6-diacetyllysine

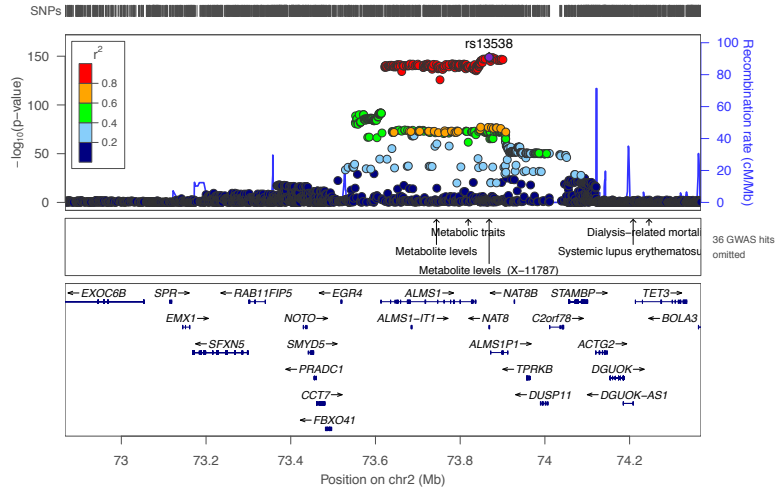

### X - 23518

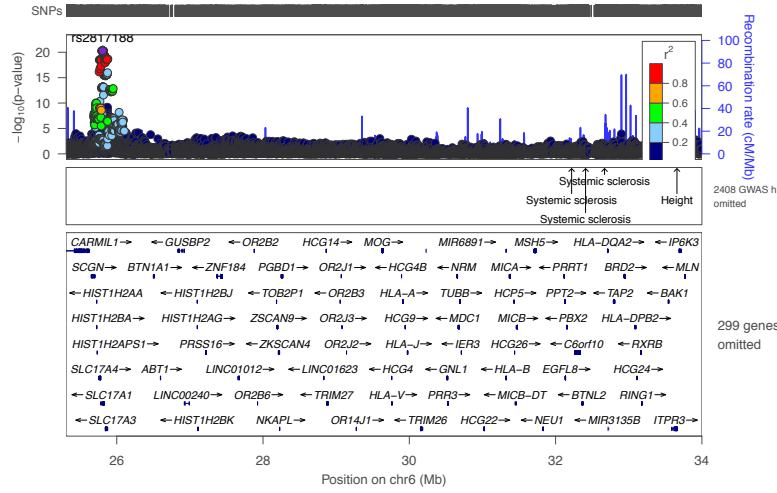

### N-acetylkynurenine (2)

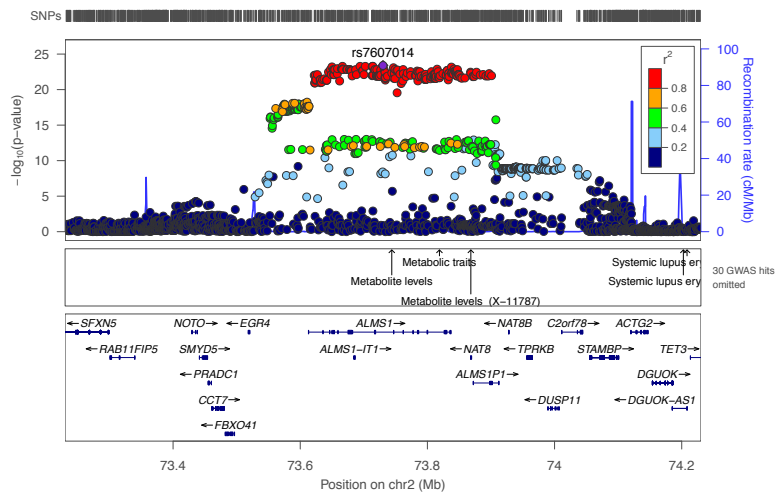

### X - 19434 retired for cholic acid glucuronide

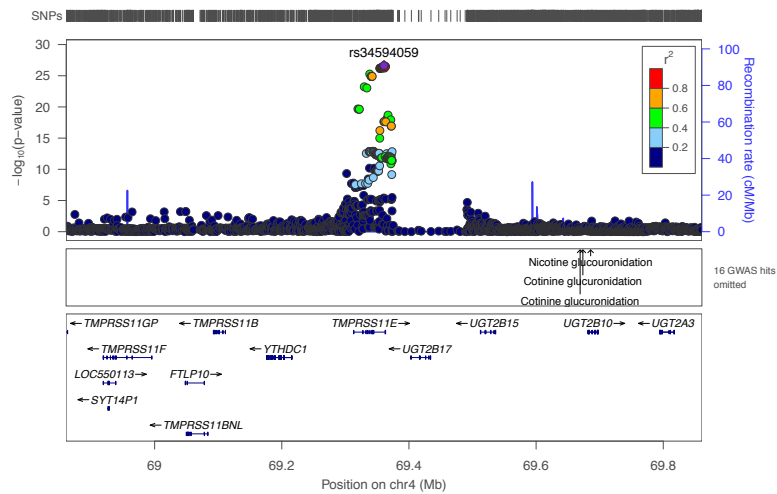

X - 23196

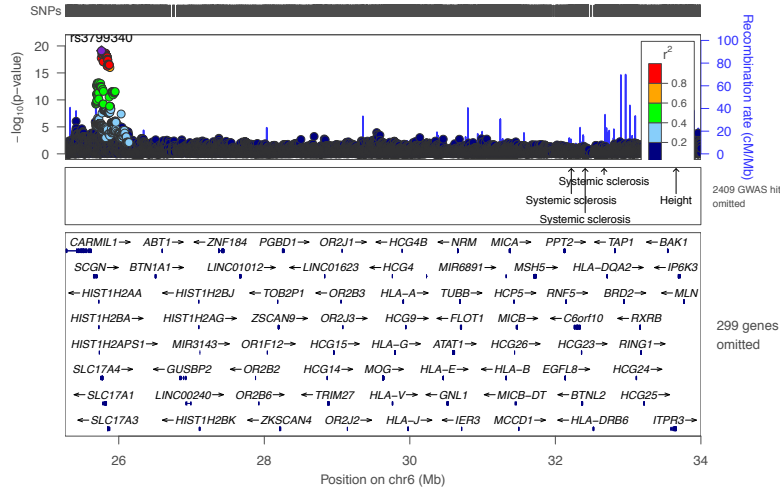

X - 23299

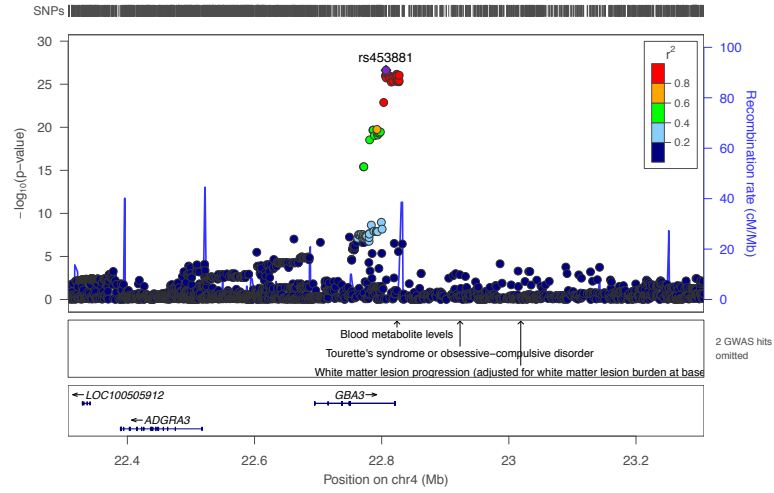

X - 23311

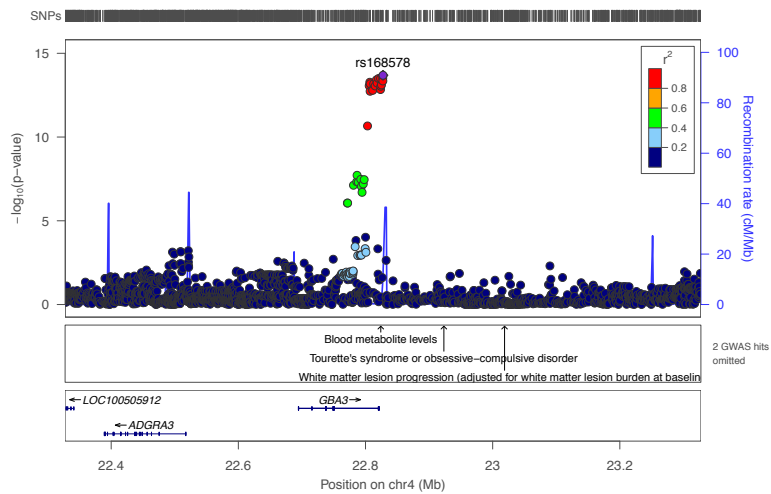

X - 23314

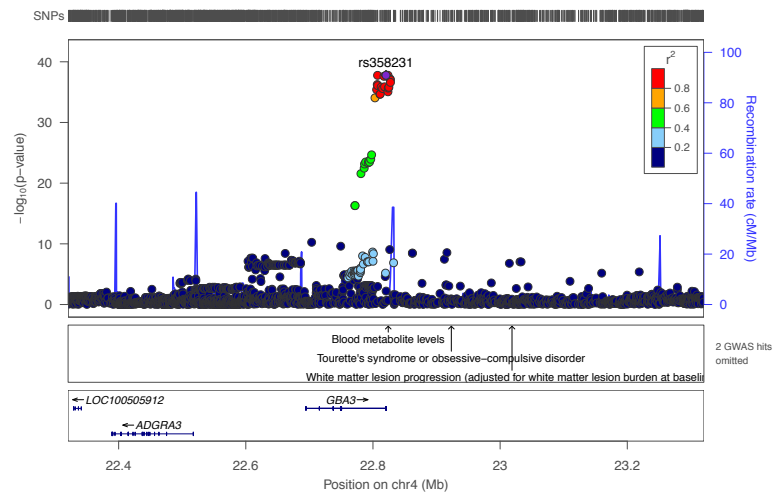

### X - 23423

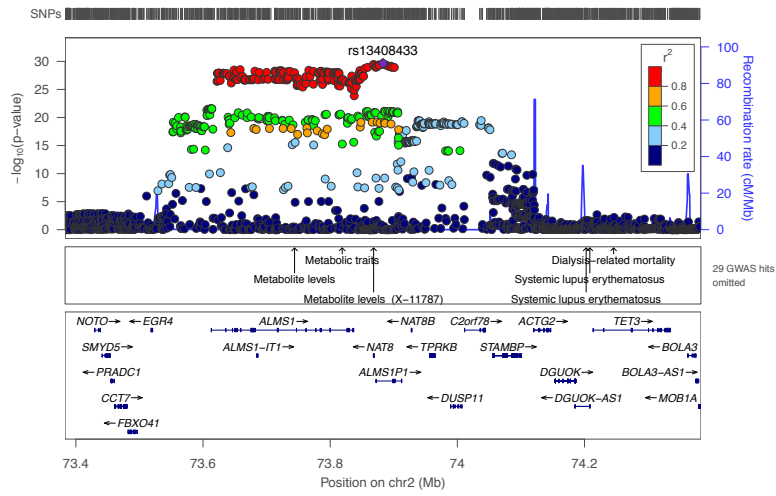

### X - 23438

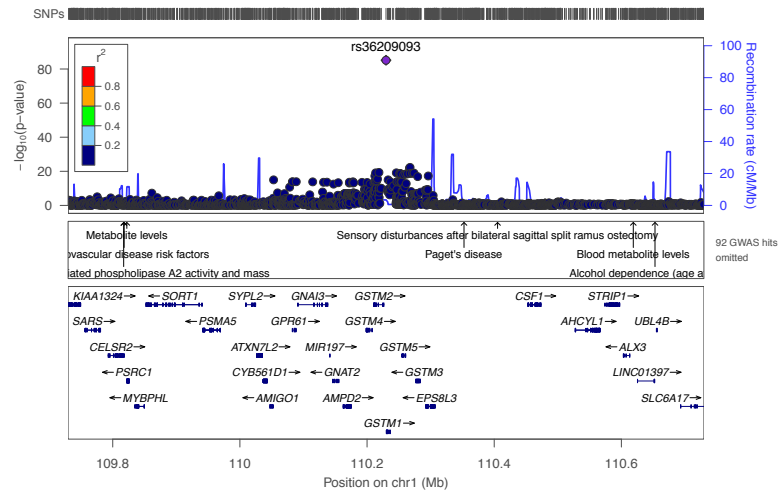

### X - 23581

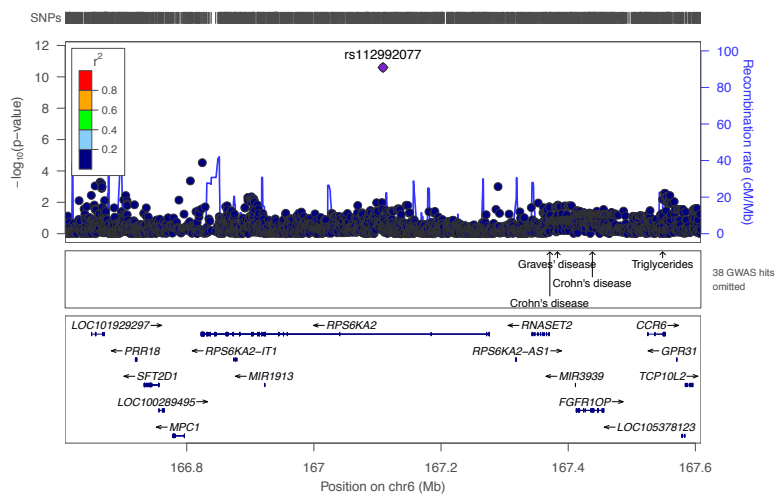

### X - 23590

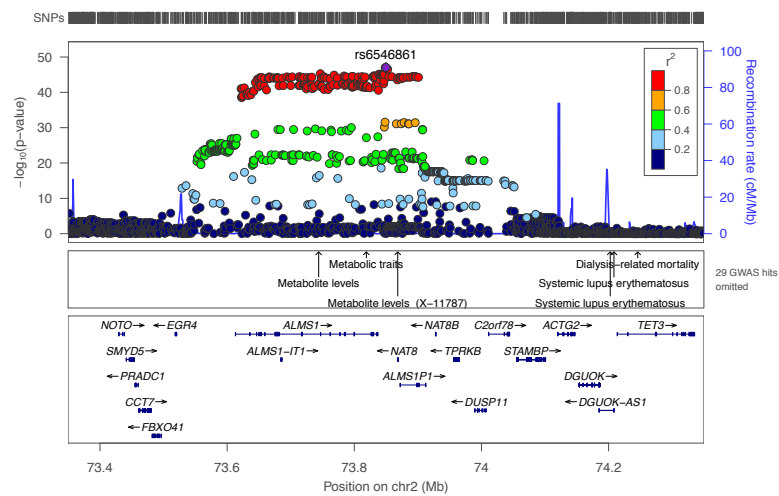

X - 23656

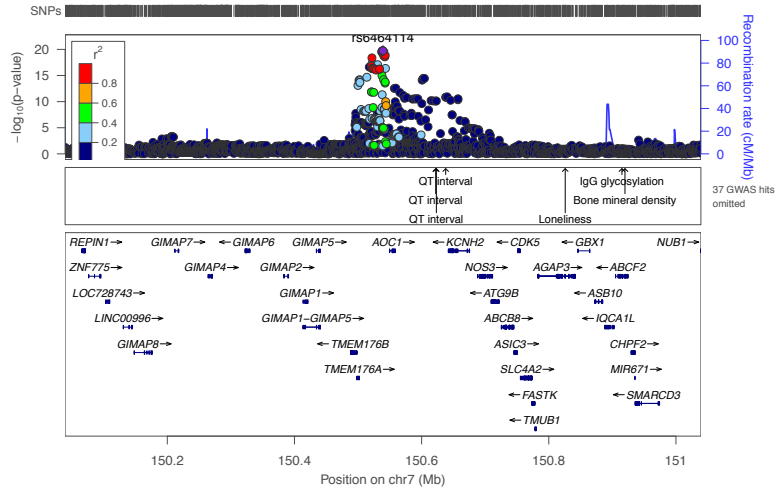

X - 23668

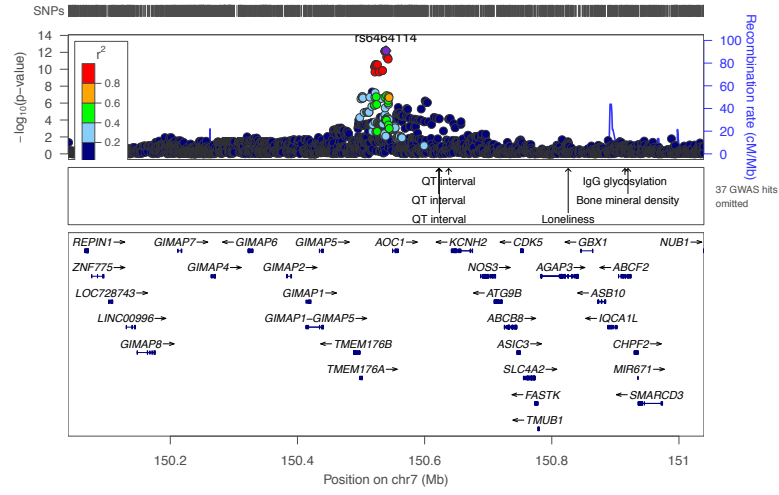

X - 23776

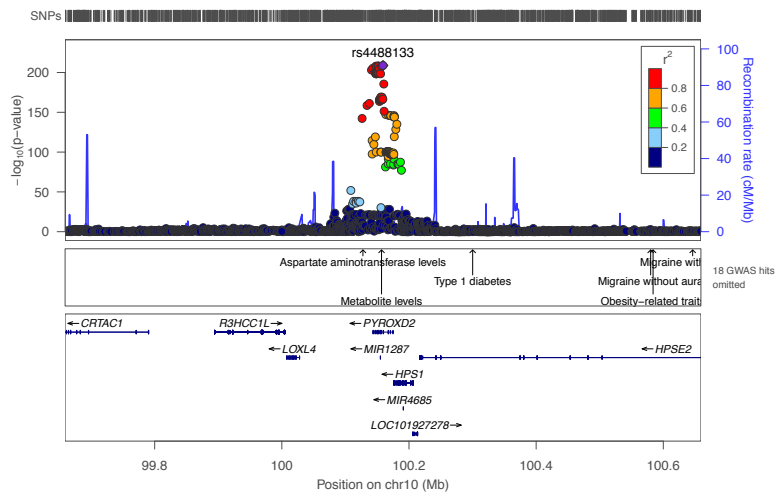

X - 13698

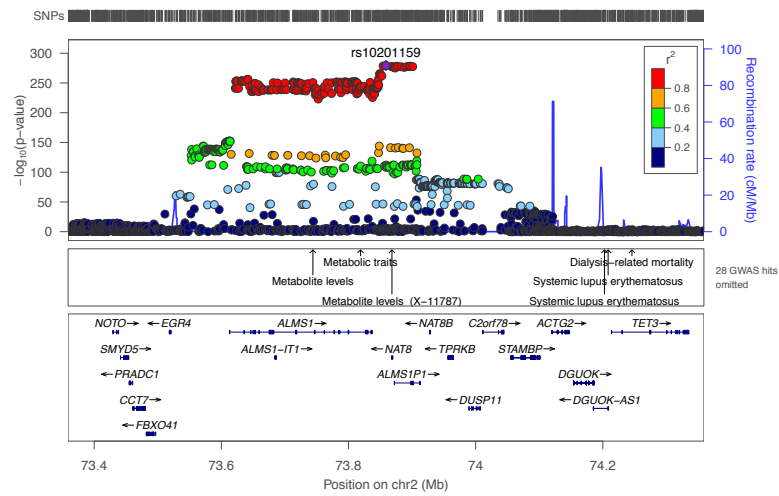



### cytidine

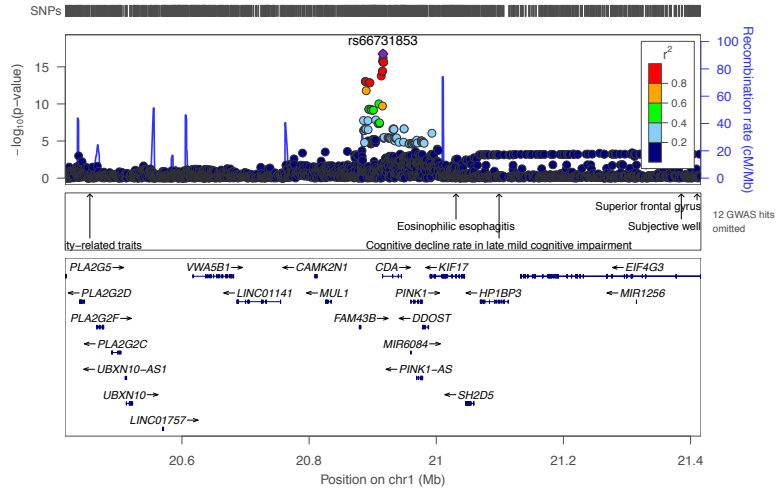

### X - 24387

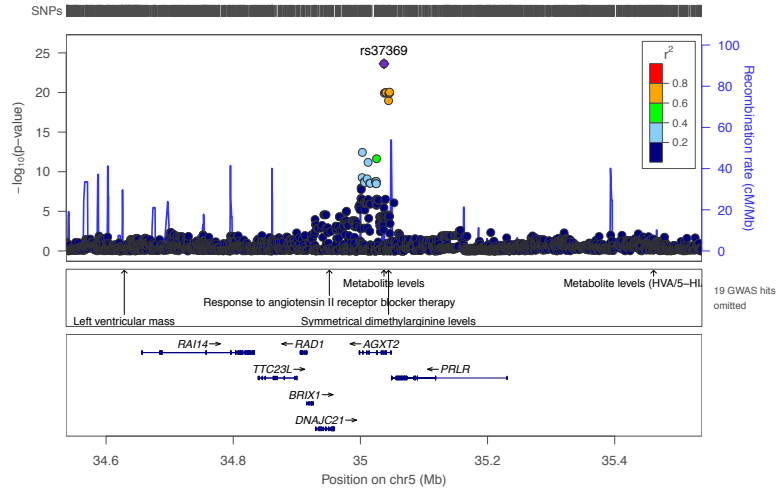

### X - 24330

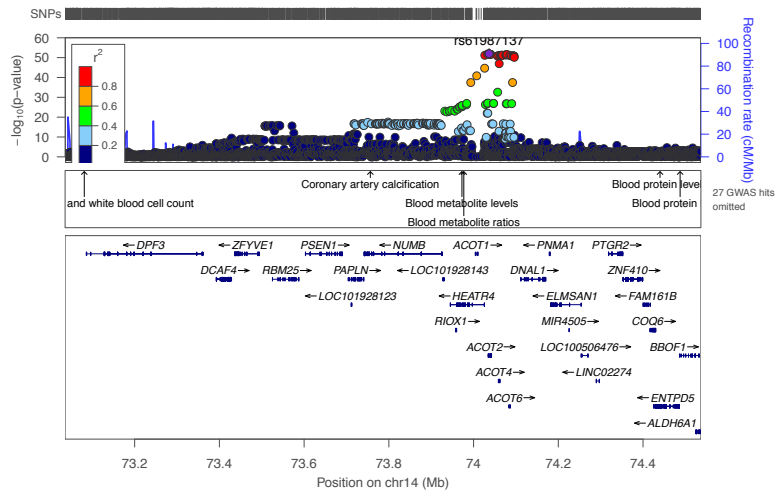

### X - 24339

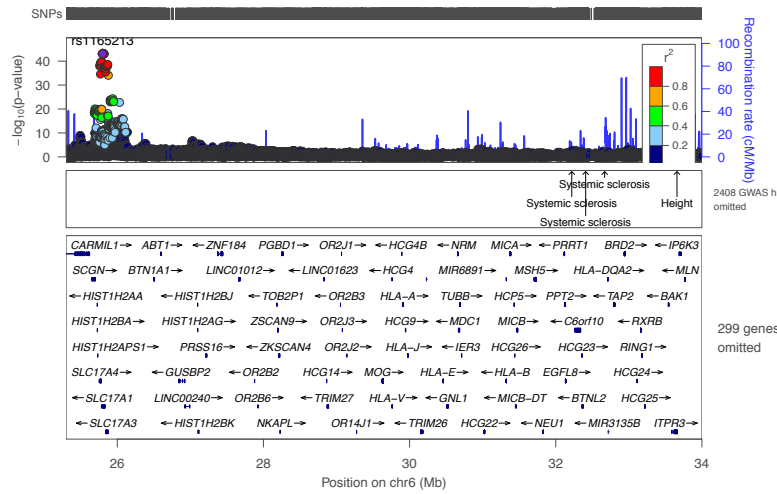

### X - 24339

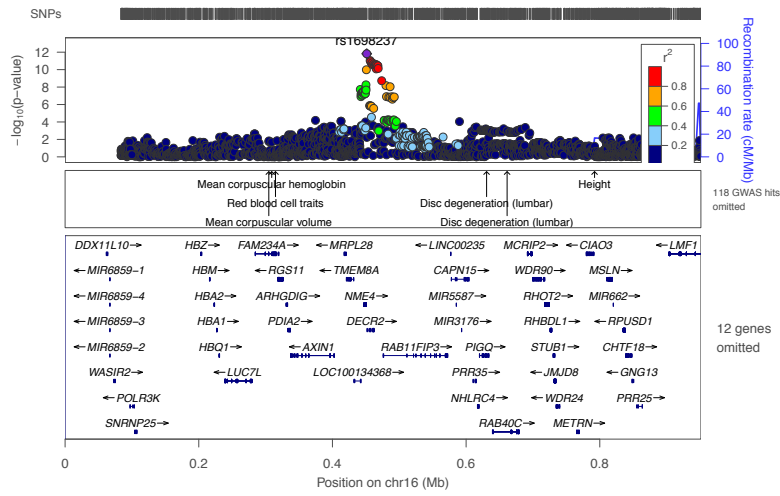

### X - 24347

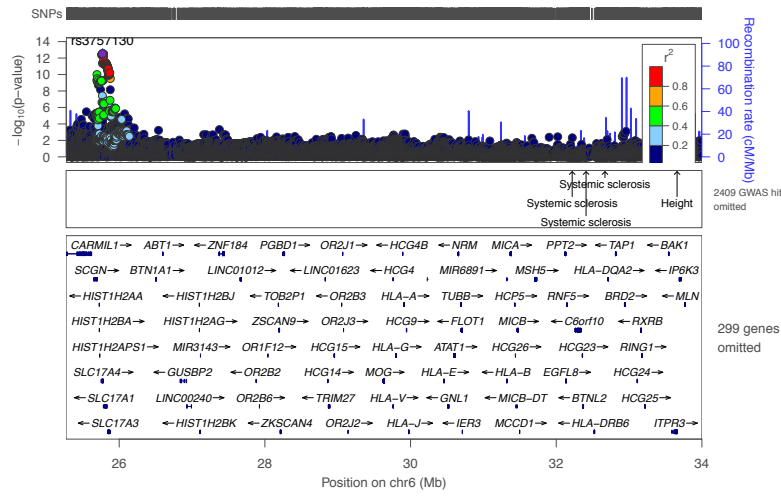

### X - 24348

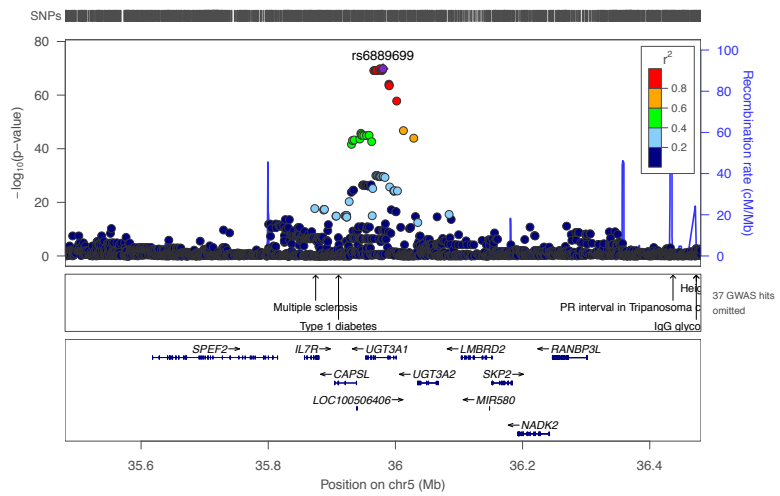

### X - 24350

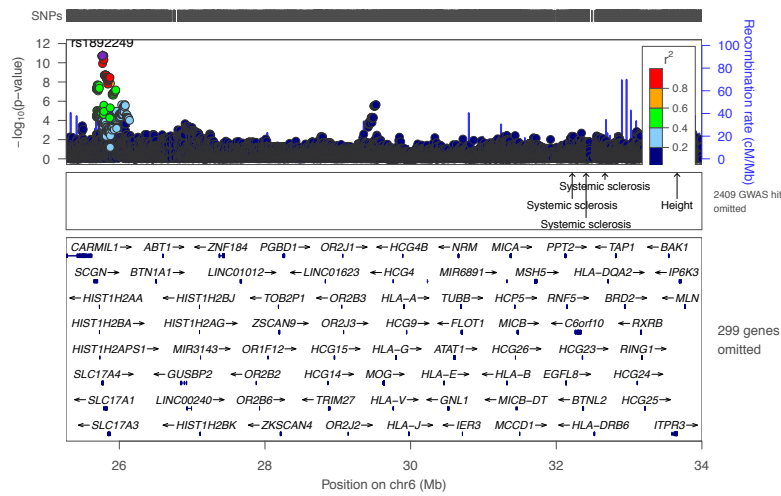

X – 24353

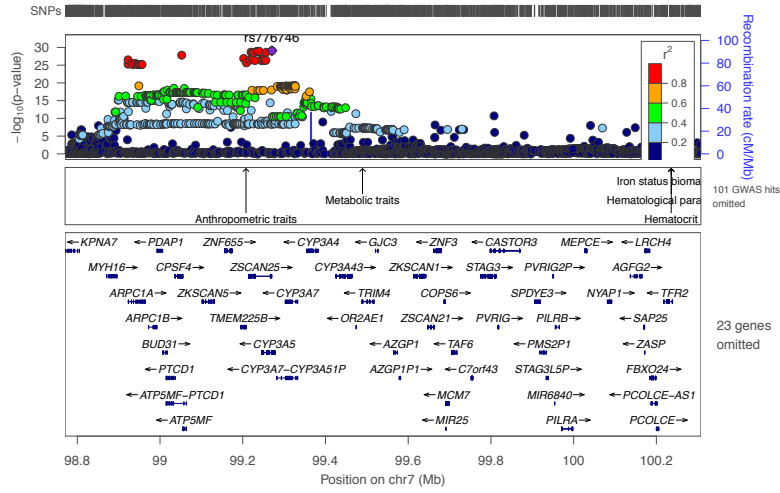

X – 24359

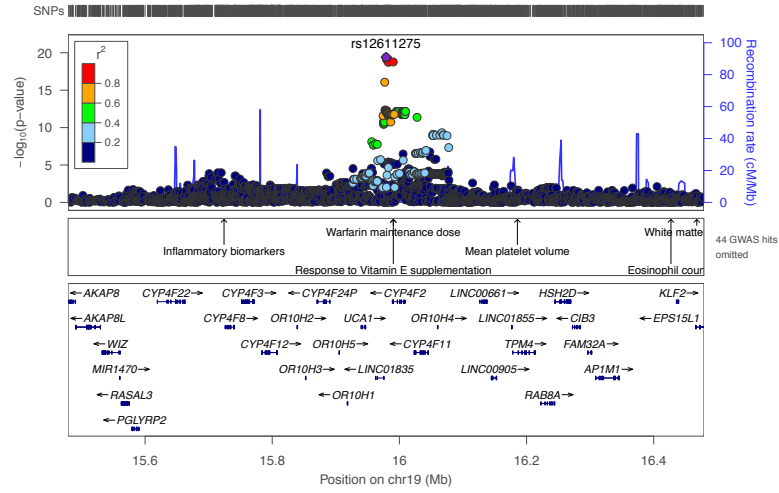

X – 24402

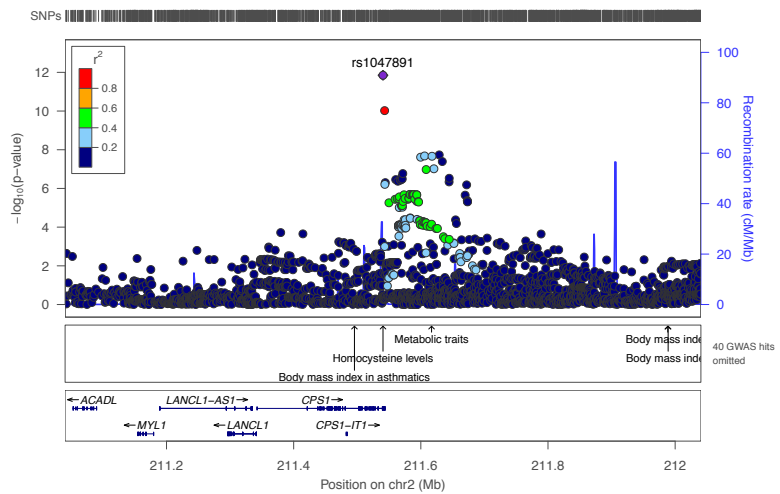

X – 24403

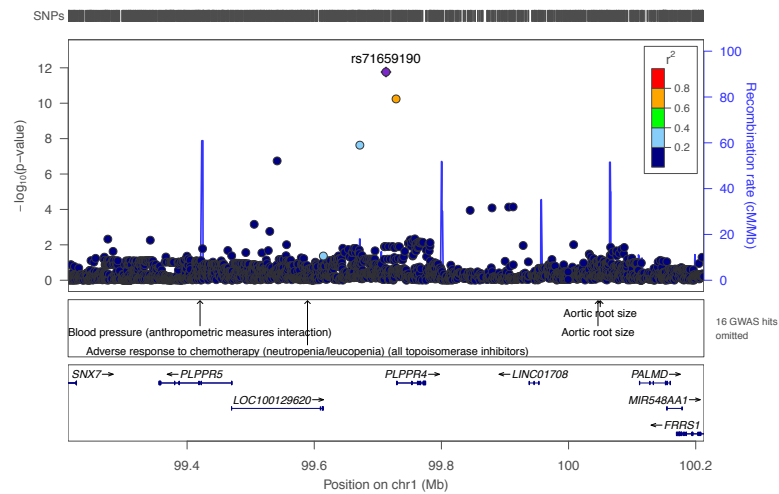

X - 24455

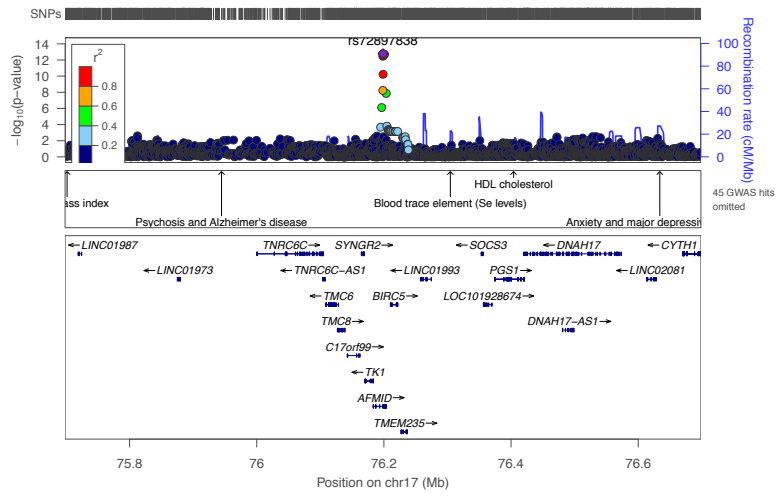

X - 24462

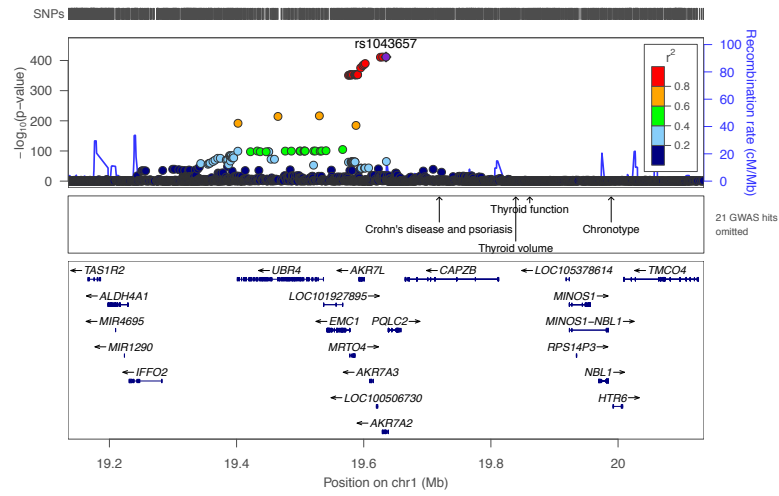

X - 24462

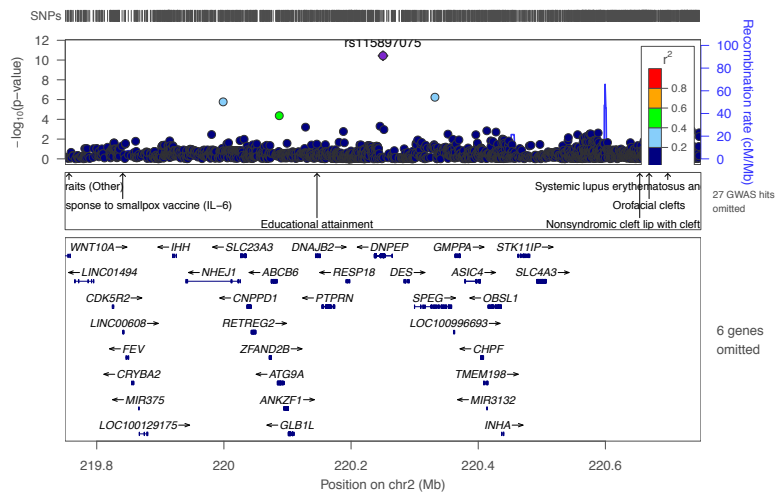

X - 24515

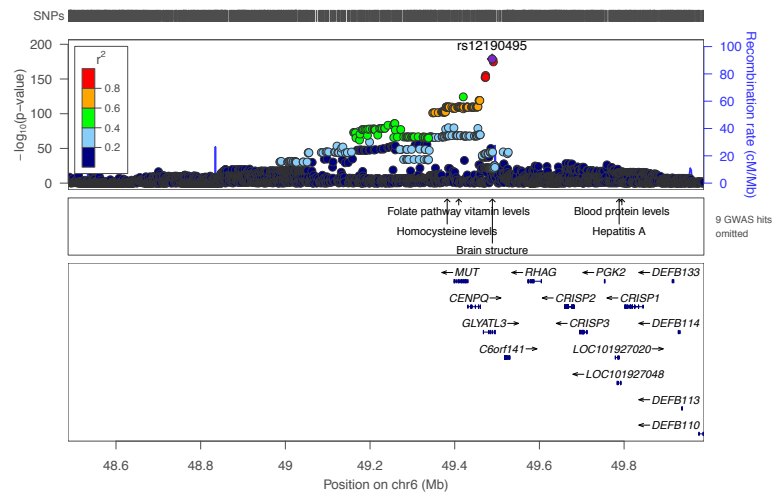

X - 24518

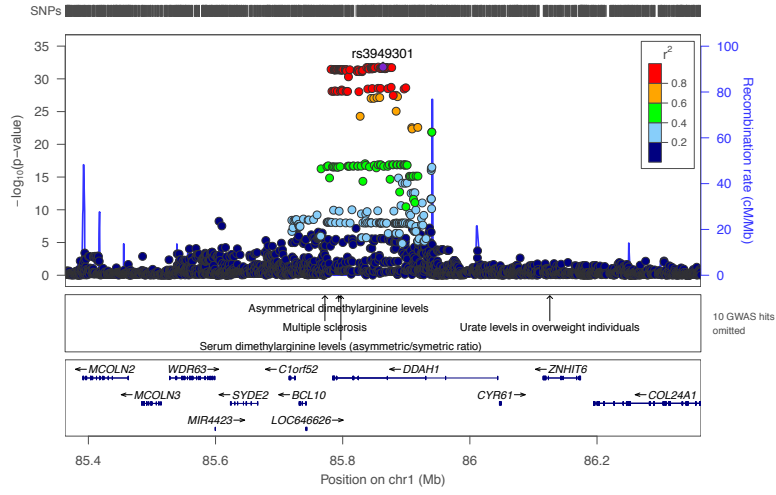

X - 24518

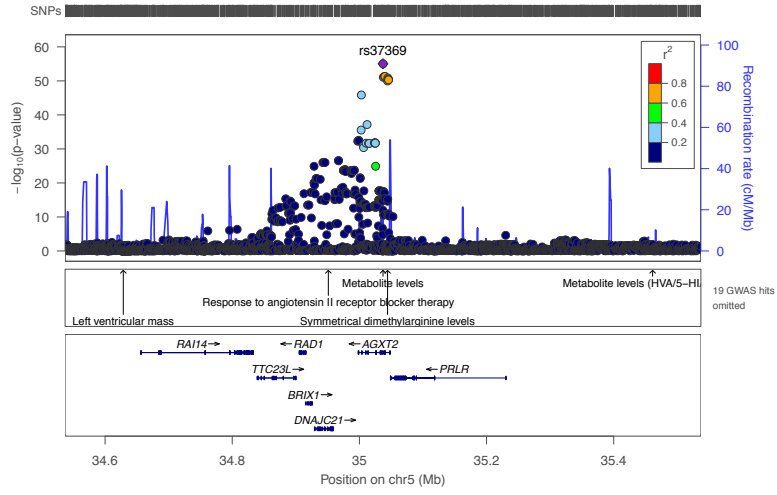

X - 24519

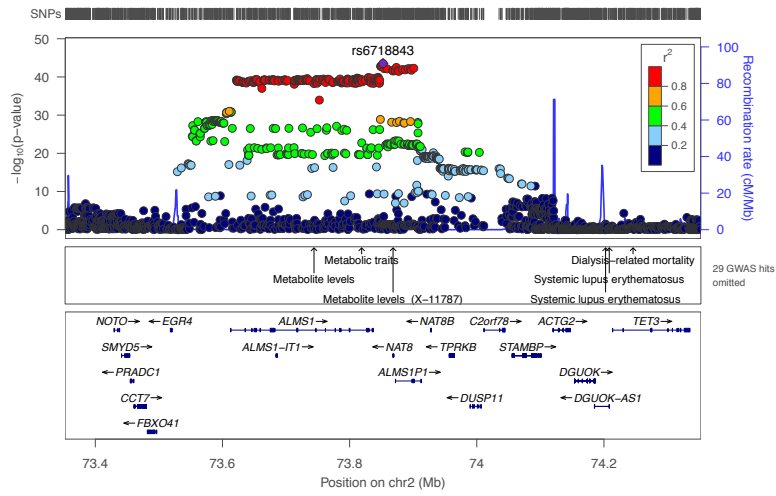

X - 24546

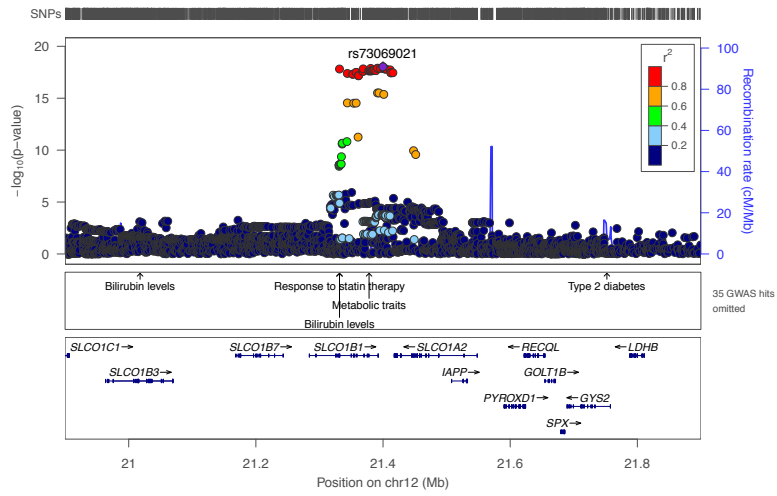

### glycodeoxycholate sulfate

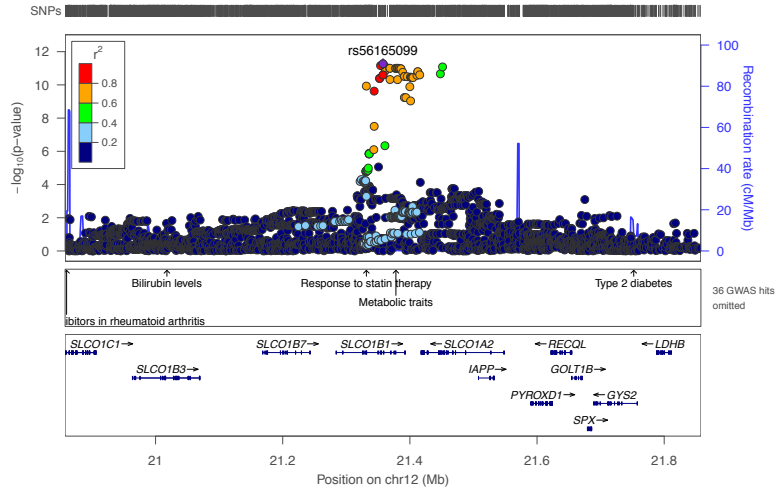

### glycochenodeoxycholate glucuronide (1)

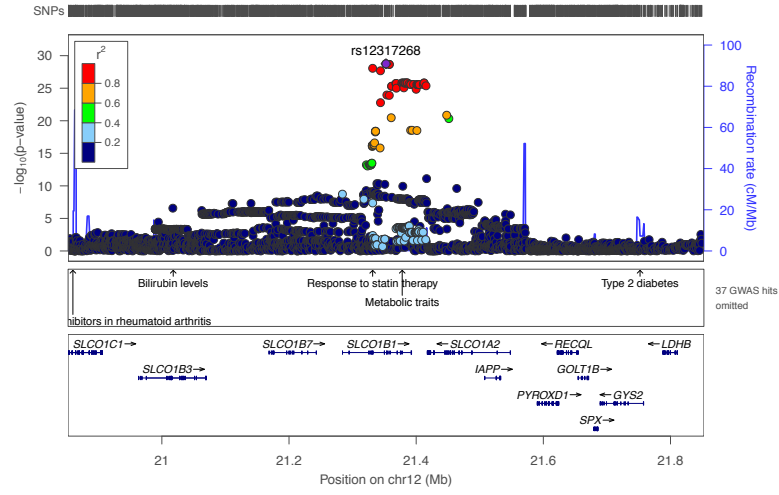

### N1,N12-diacetylspermine

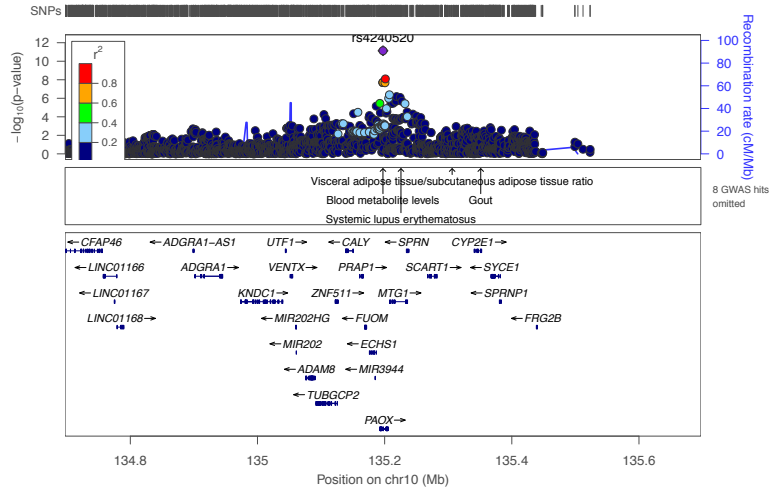

### methylsuccinoylcarnitine

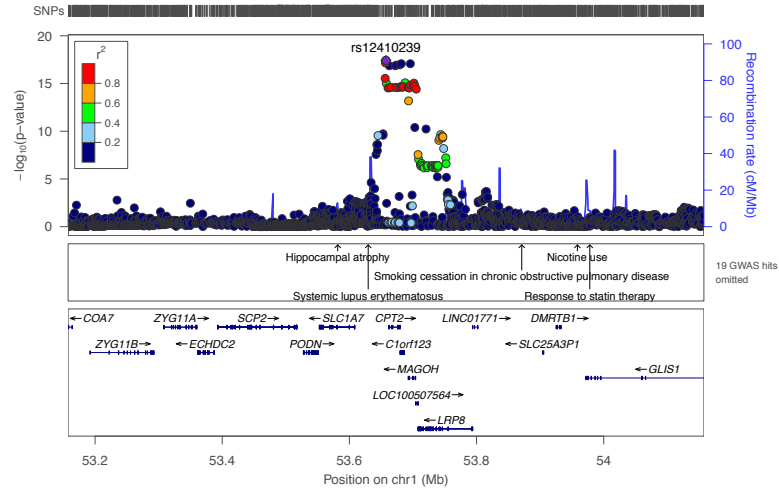

### X – 24736

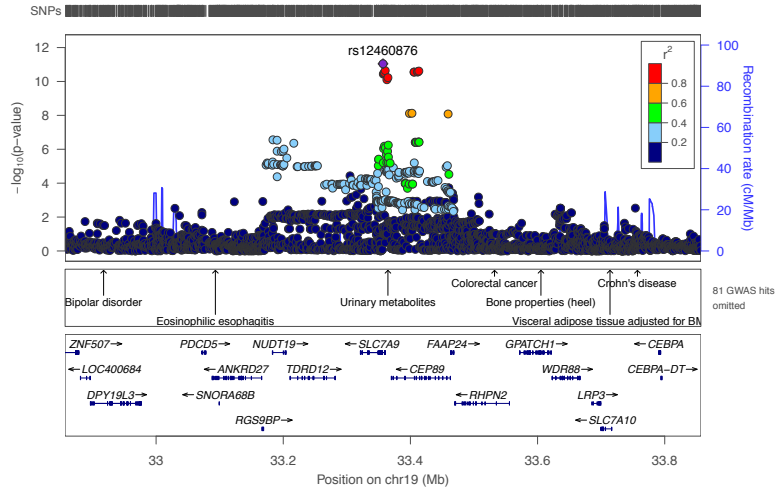

### 3-methylglutarate/2-methylglutarate

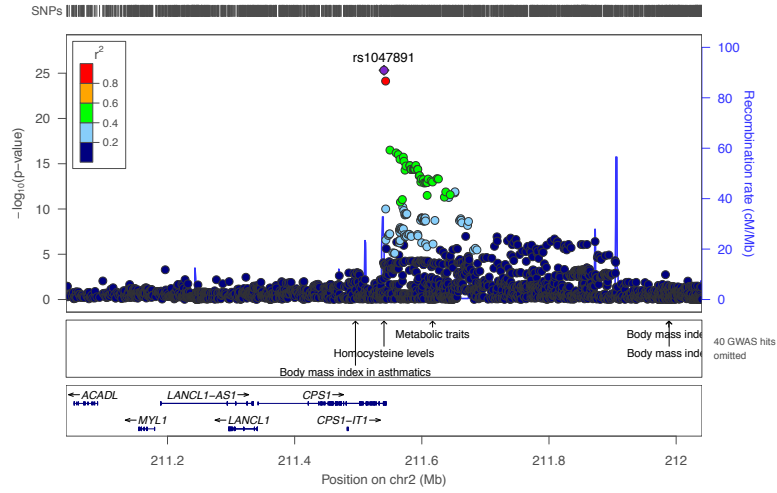

### 3-methylglutarate/2-methylglutarate

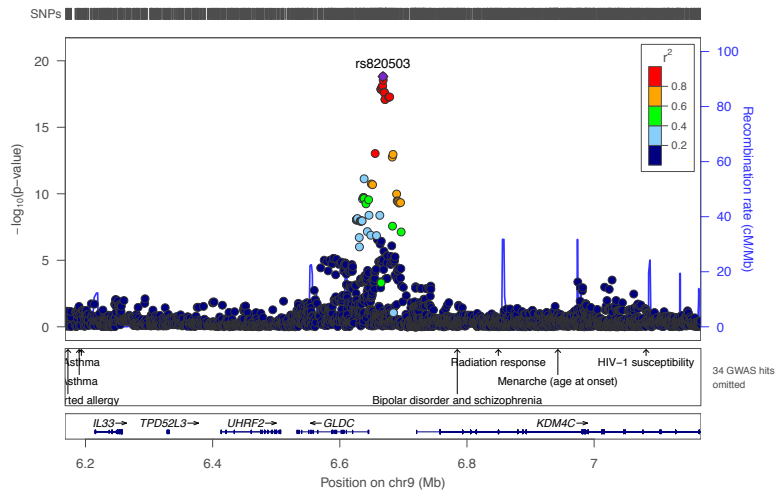

### alpha-hydroxymetoprolol

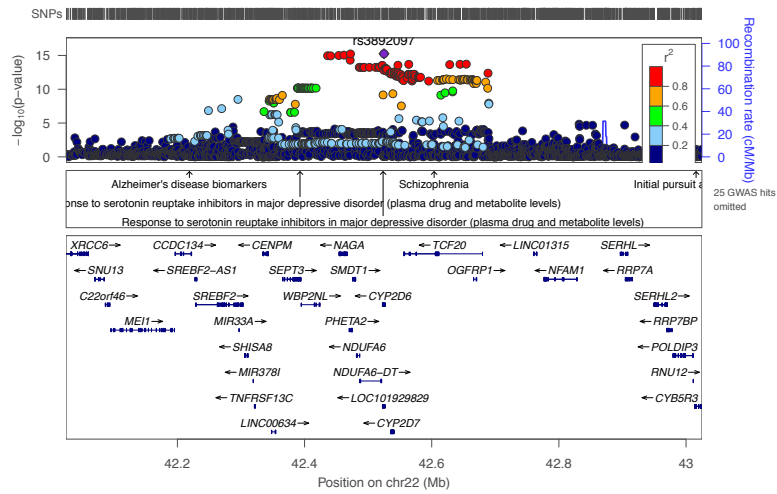

furaneol sulfate

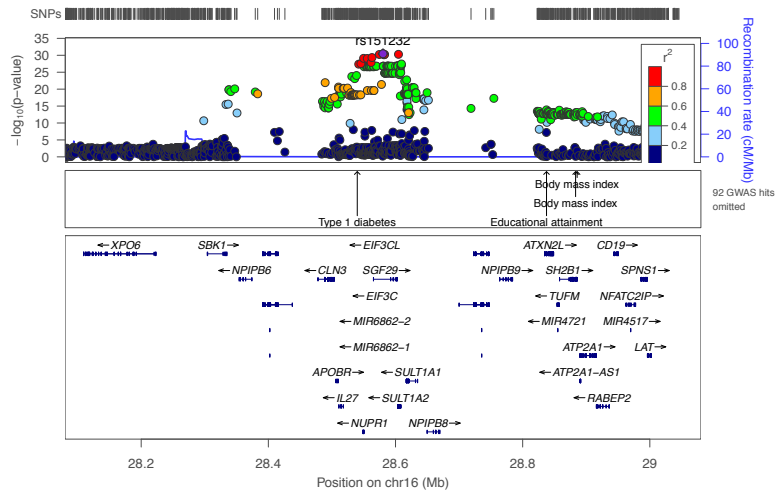

X - 24796

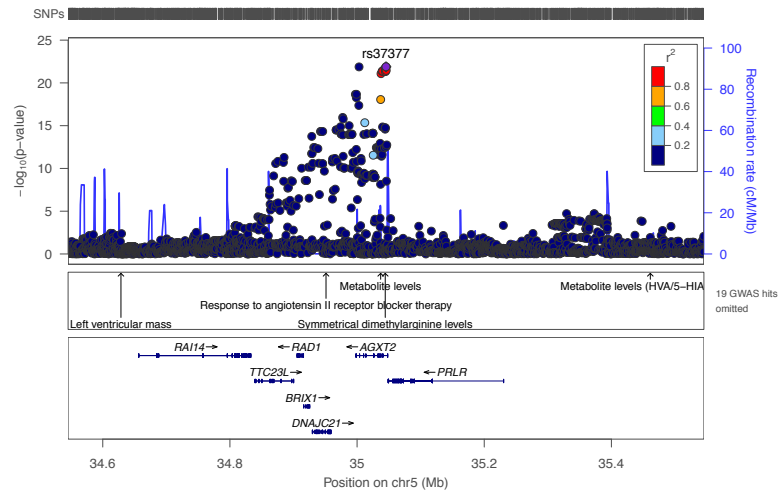

X - 24809

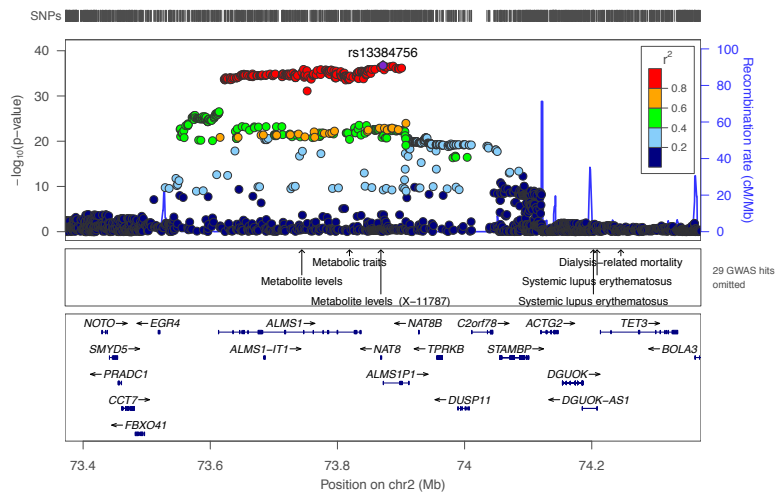

X - 24809

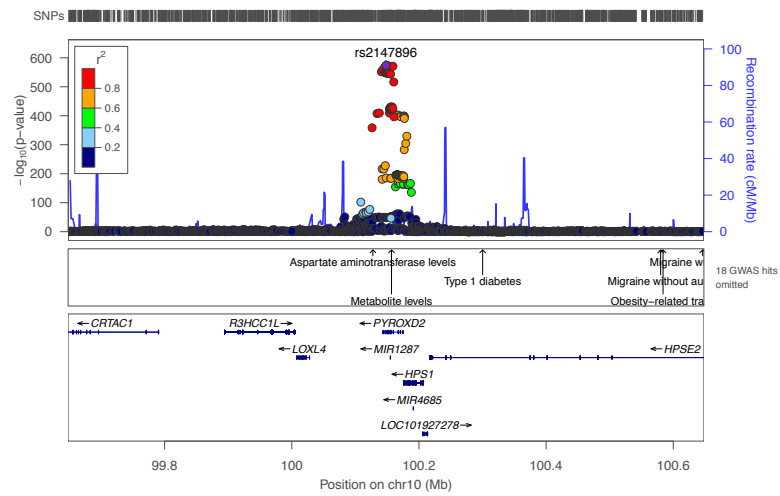



### hexanoylglutamine

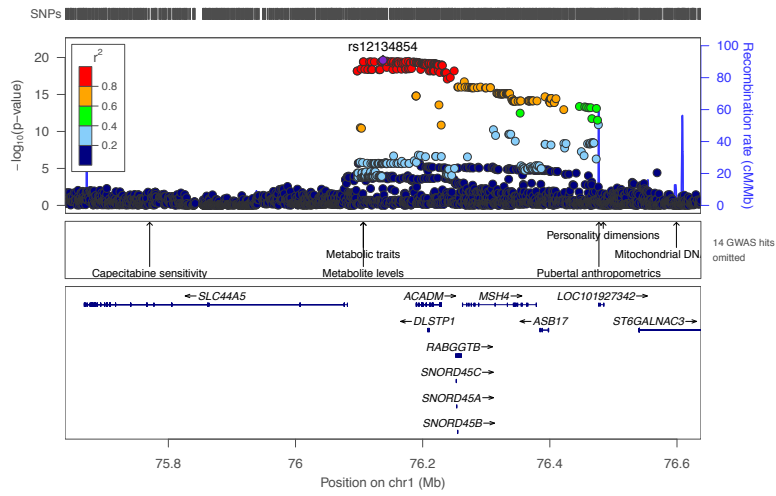

### hexanoylglutamine

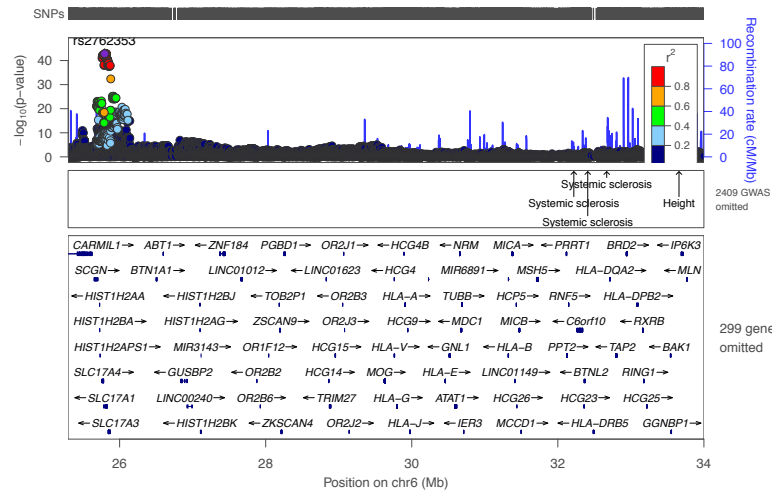

### heptanoylglutamine

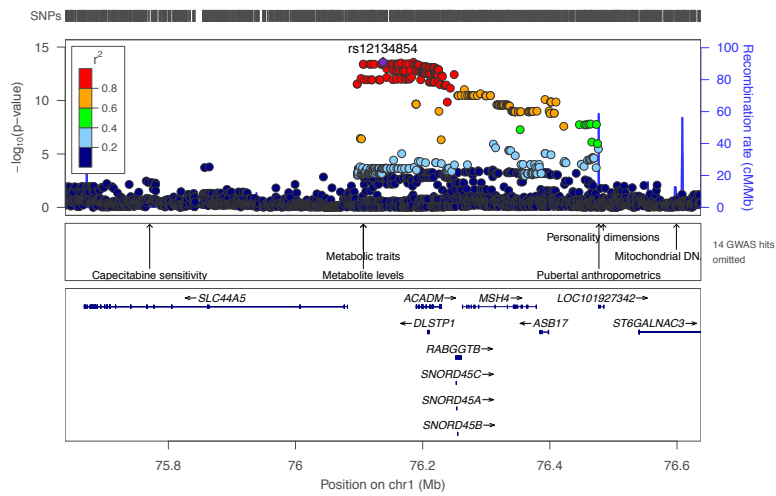

### heptanoylglutamine

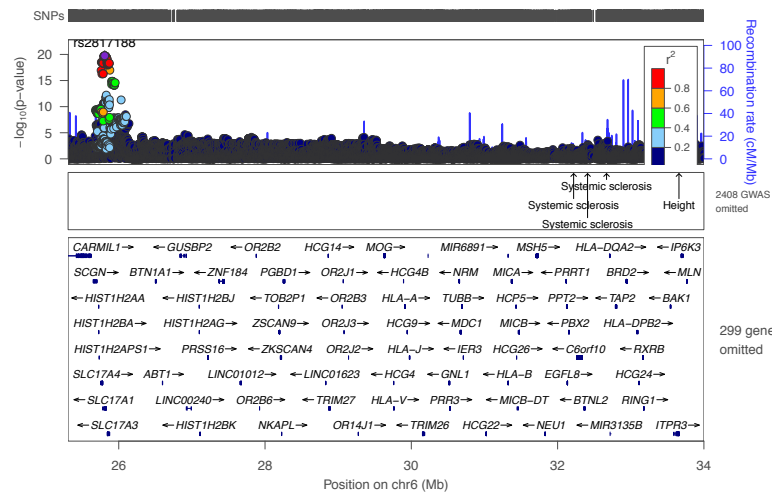

### N-octanoylglutamine

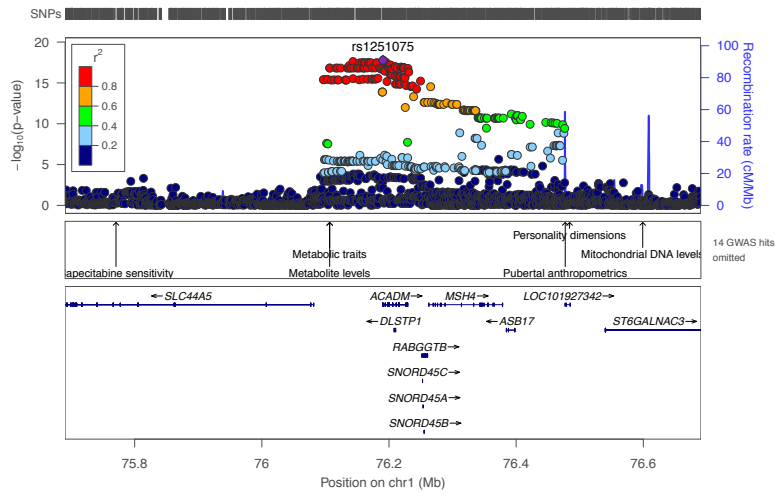

### N-octanoylglutamine

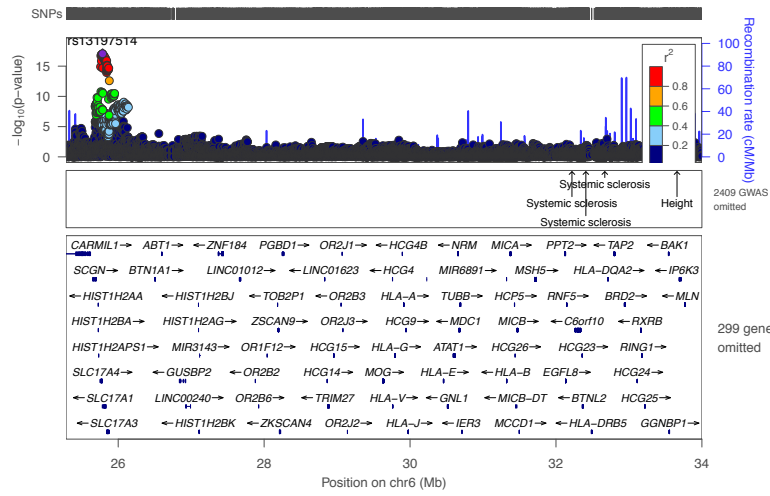

### beta-citrylglutamate

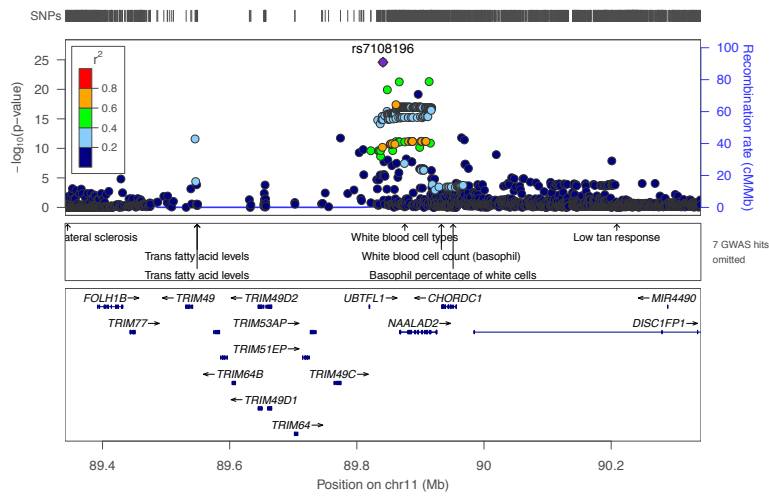

### tryptophan

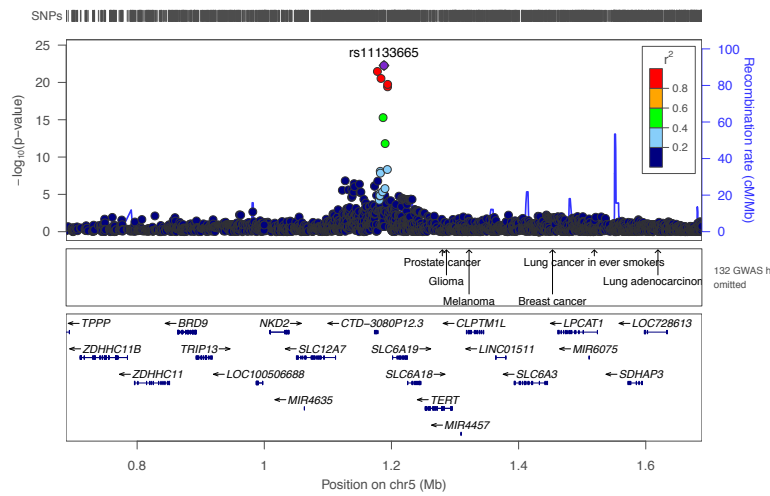

### adenosine

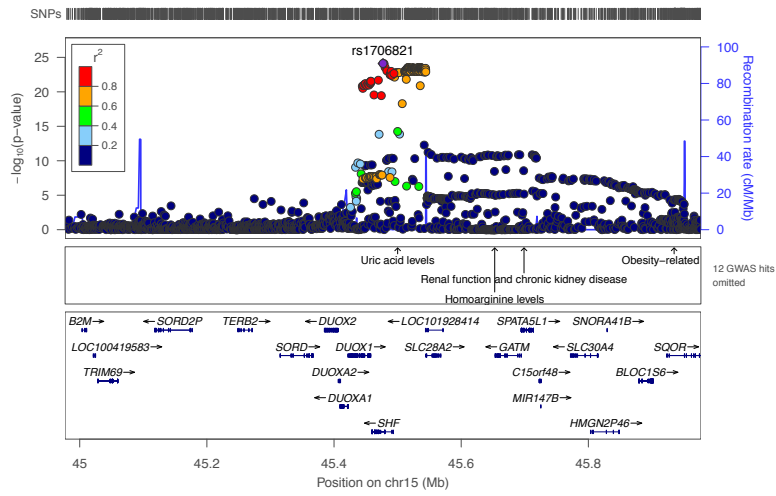

### lactose

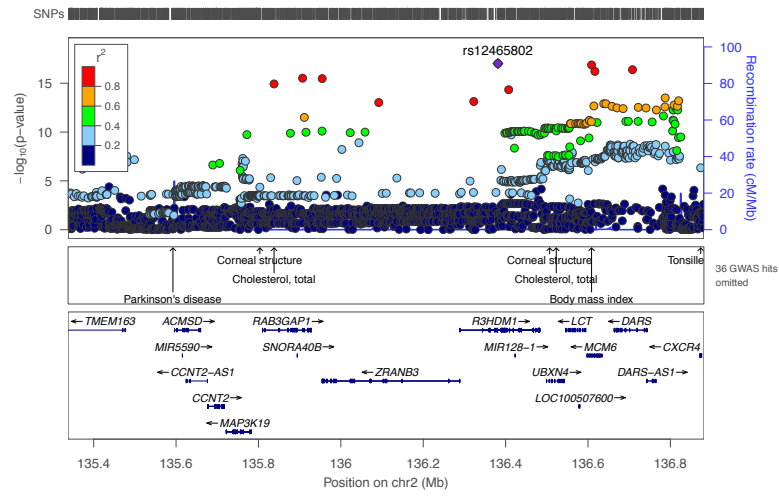

### glycerophosphoserine\*

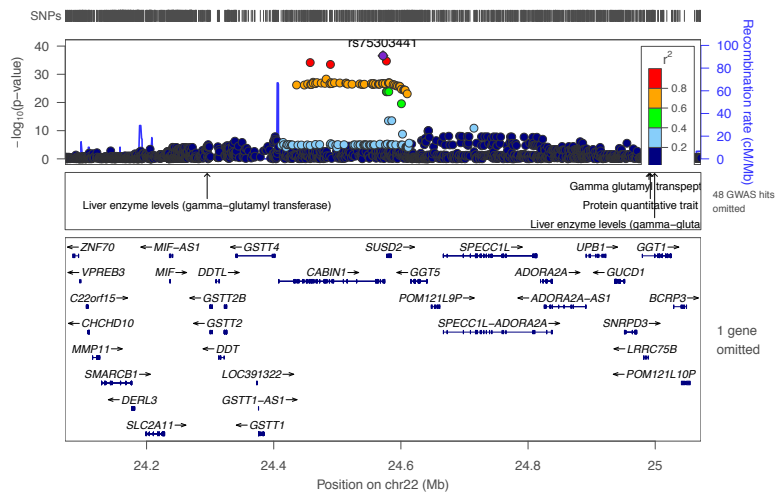

### 2'-O-methylcytidine

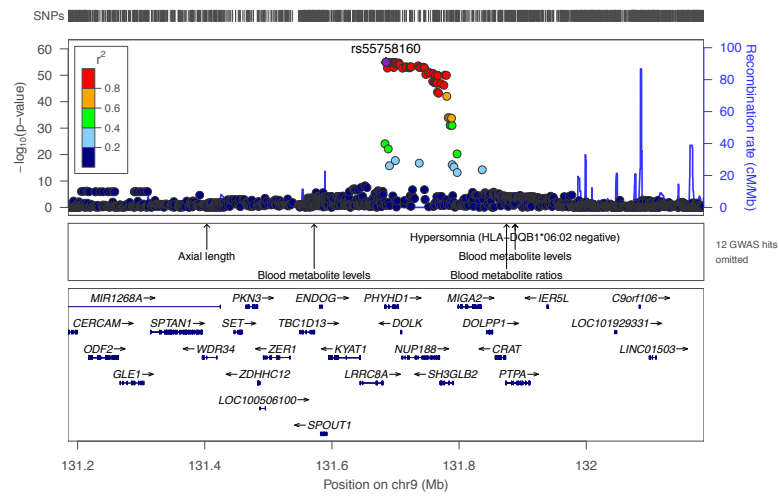

### 2'-O-methyluridine

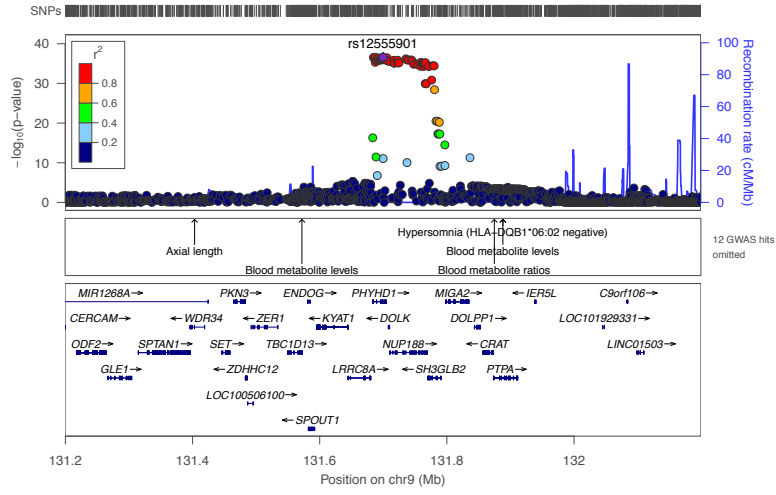

### 3-methylglutaconate

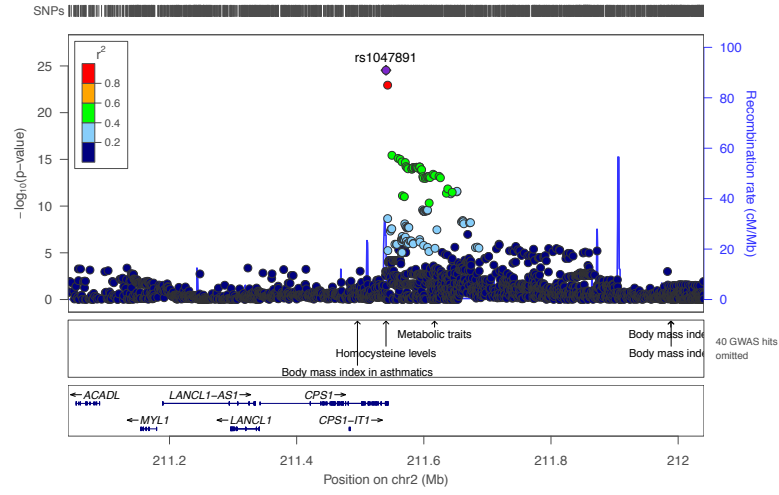

### 3-methylglutaconate

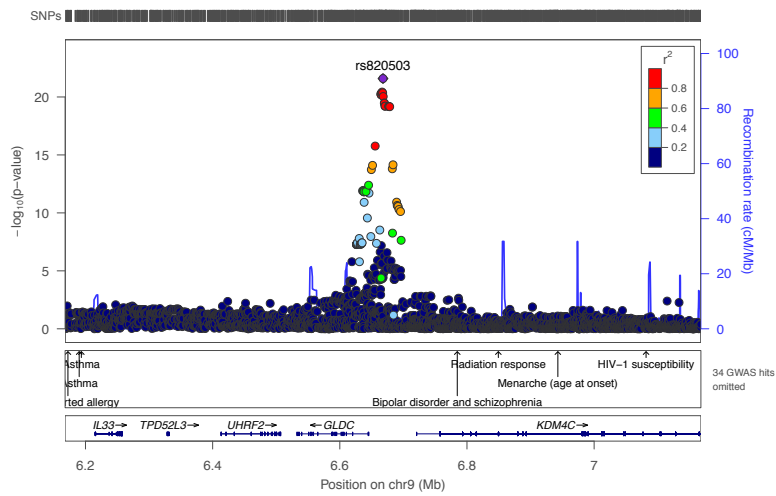

### X - 24983

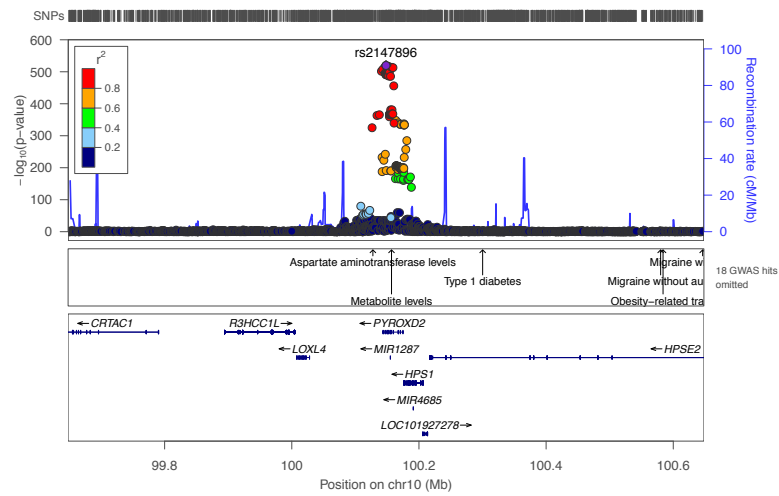

### glutamate

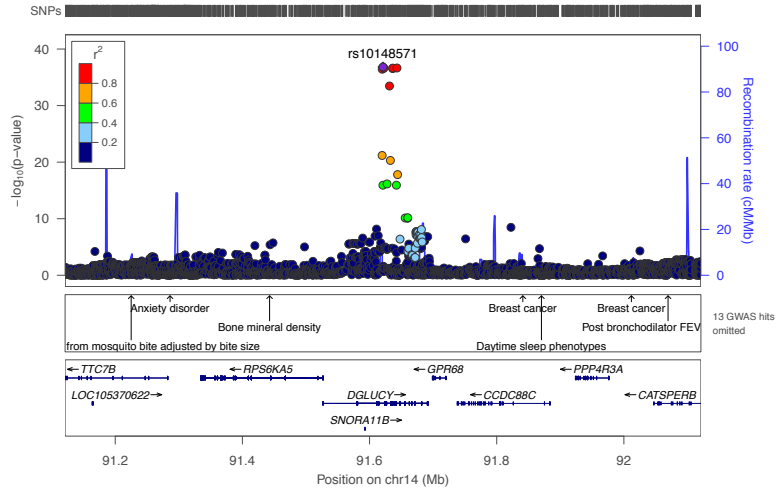

### gluconate

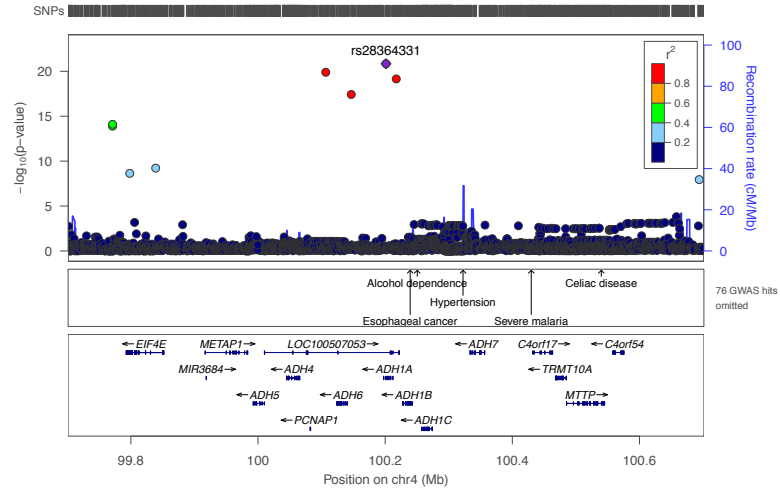

### trans-urocanate

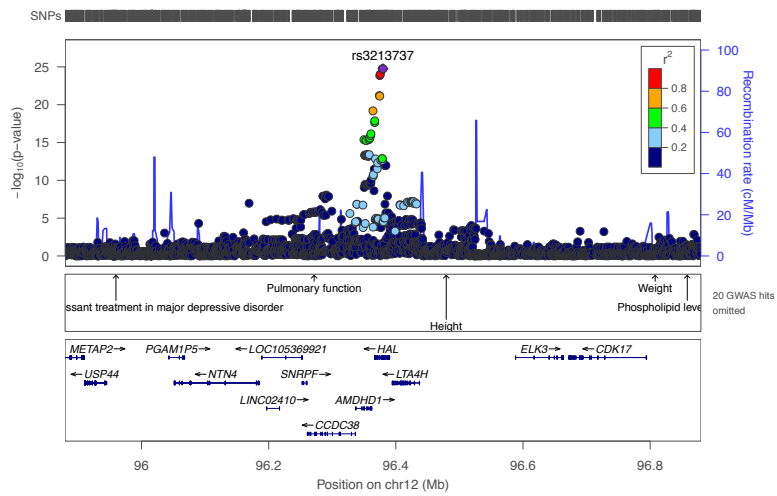

### isocaprolyglycine

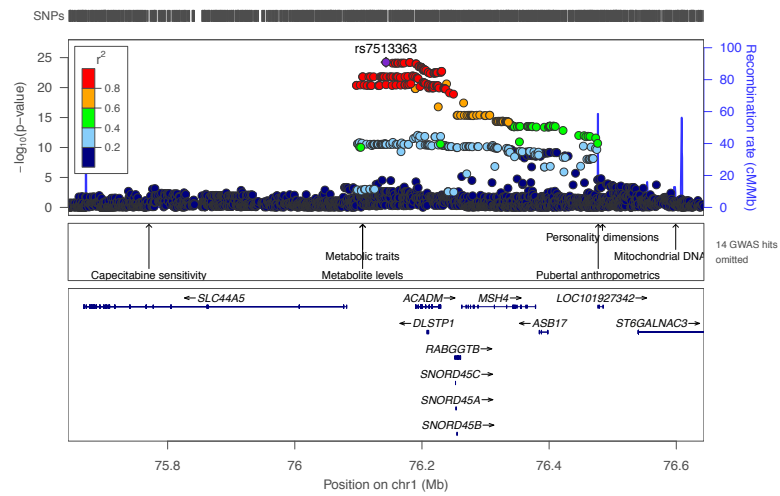

### isocaproylglycine

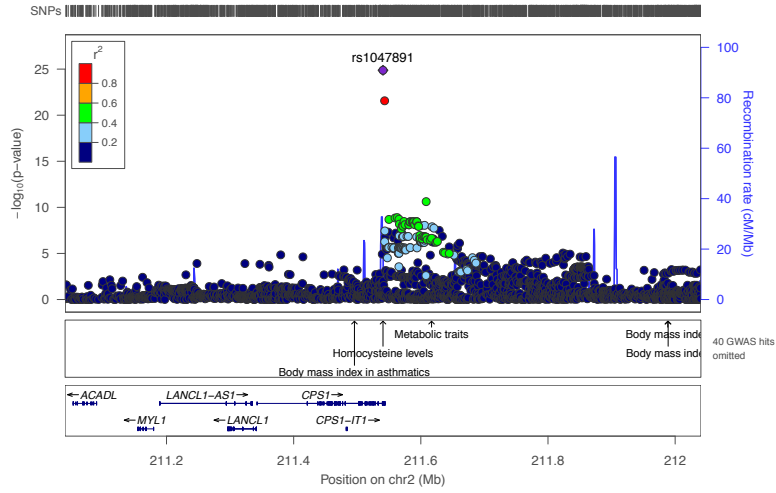

### isocaproylglutamine

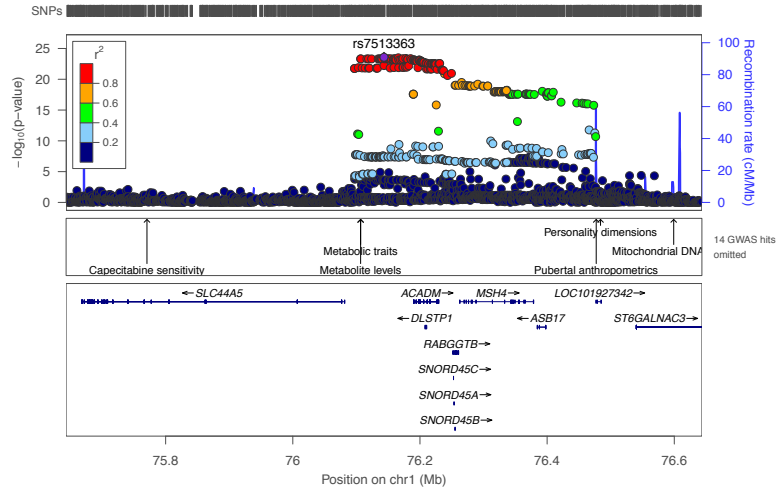

### isocaproylglutamine

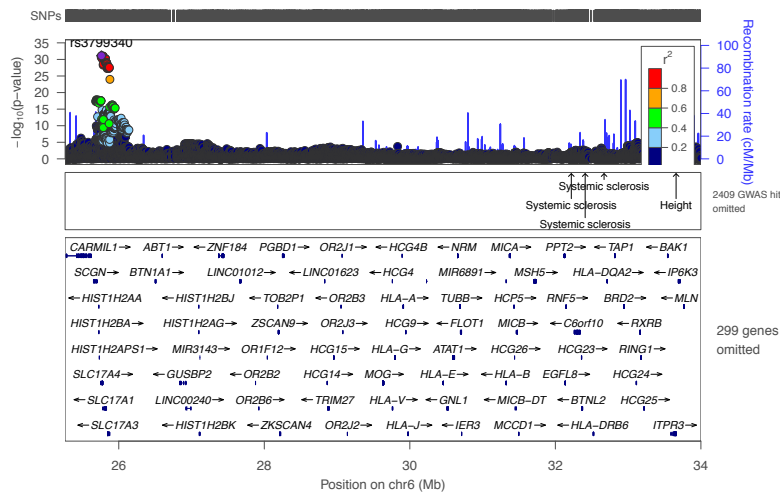

### nonenedioate (C9:1-DC)\*

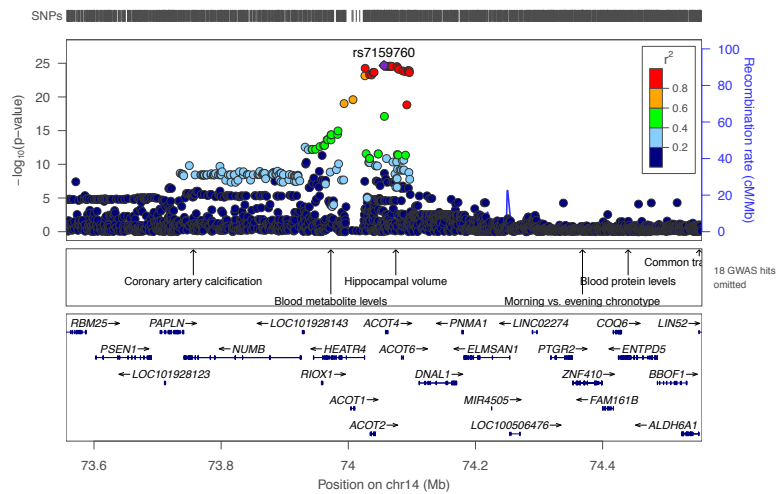

nonenedioate (C9:1-DC)\*

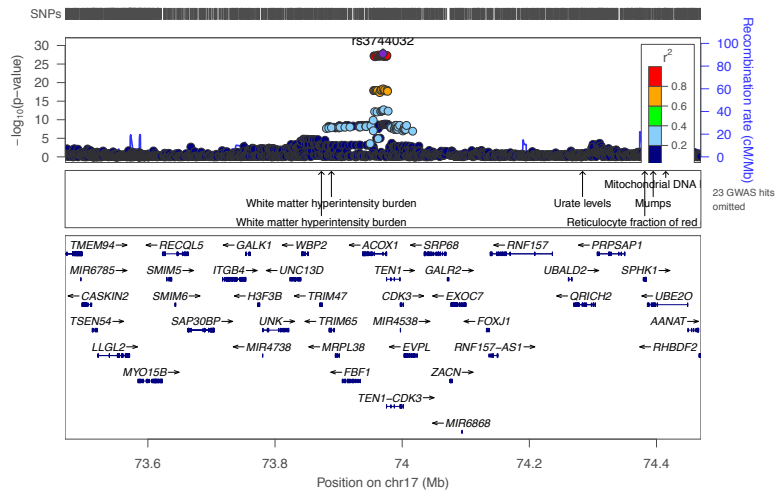

N-acetylglucosamine conjugate of C24H40O4 bile acid\*\*

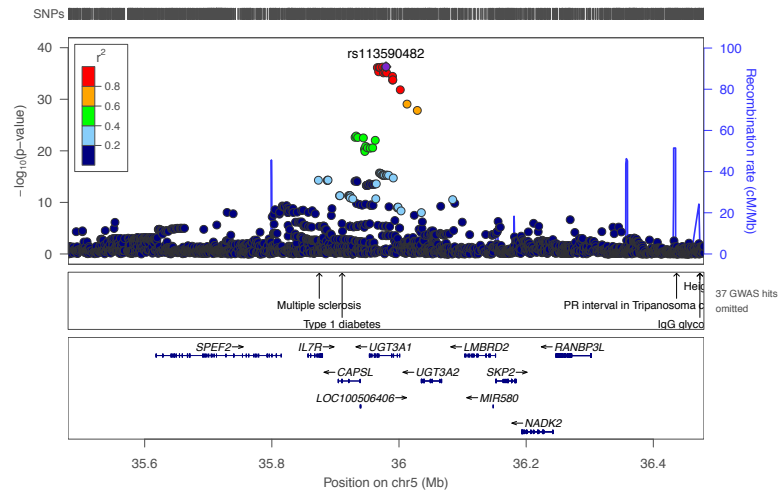

glucuronide of C12H22O4 (2)\*

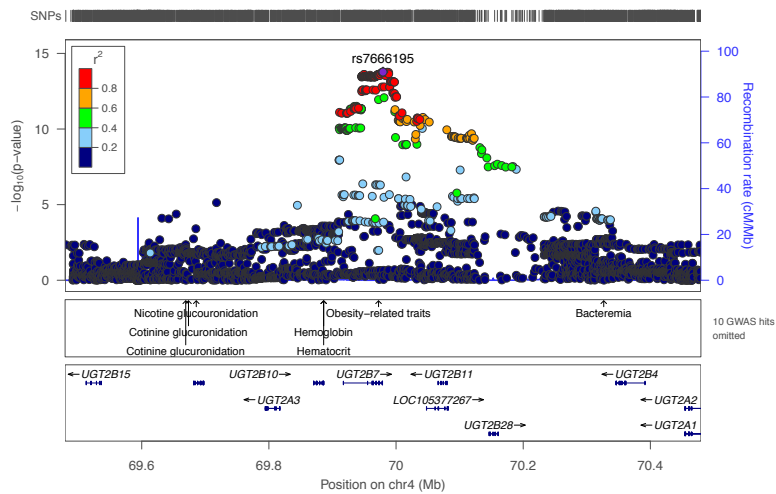

glucuronide of C10H18O2 (11)\*

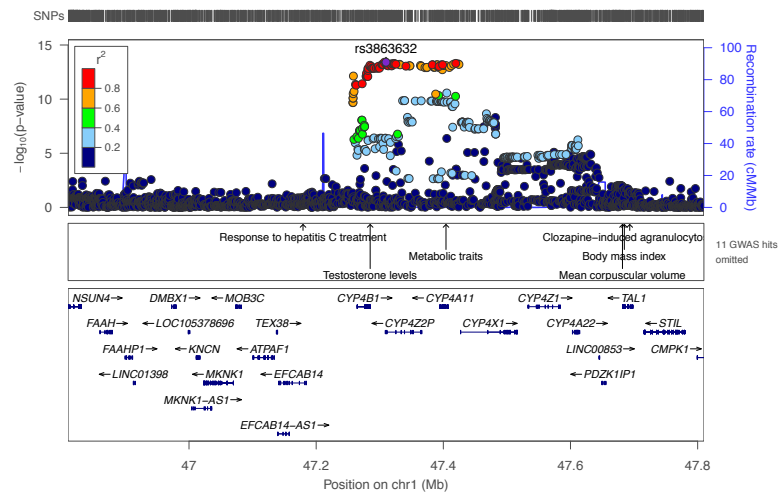

### glucuronide of C10H18O2 (12)\*

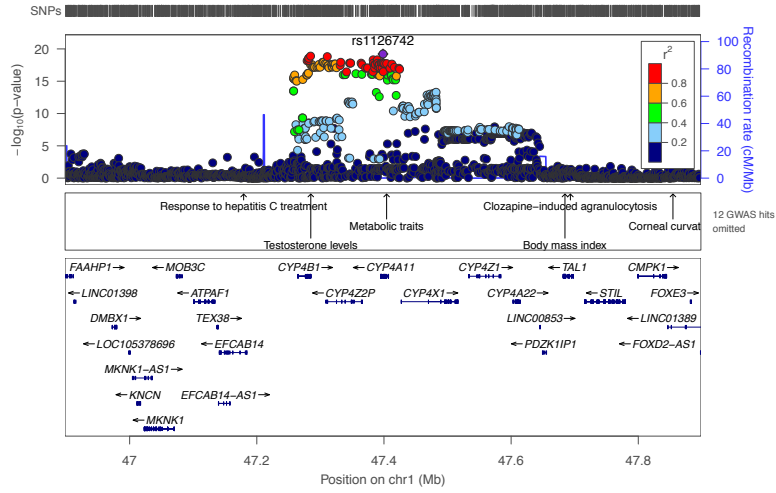

### glyco-beta-muricholate\*\*

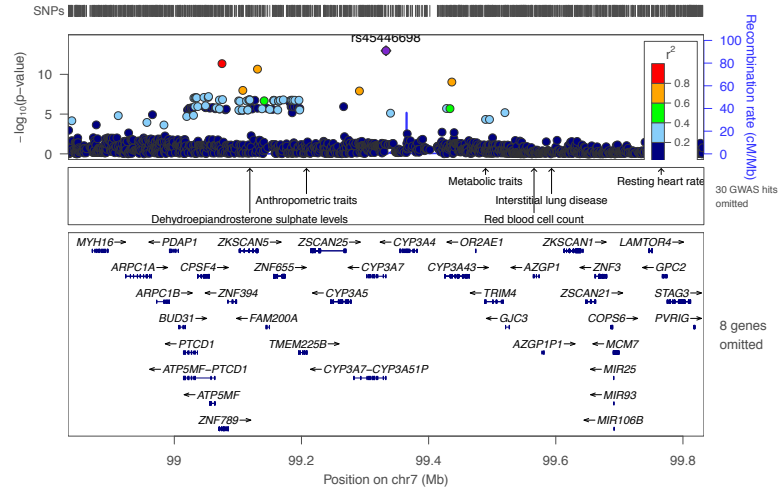

### cysteinylglycine disulfide\*

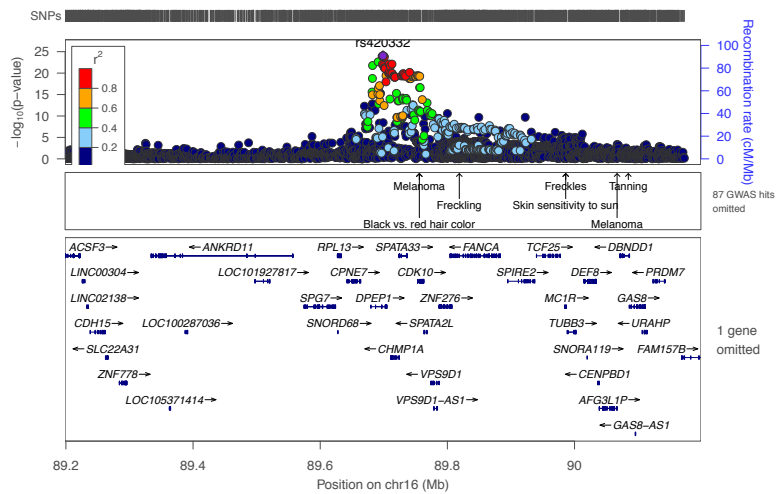

### diacetylspermidine\*

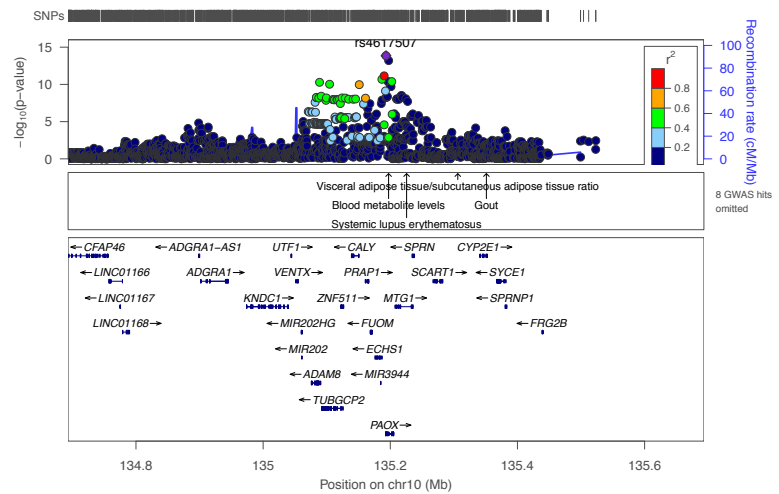



### diacetylspermidine\*

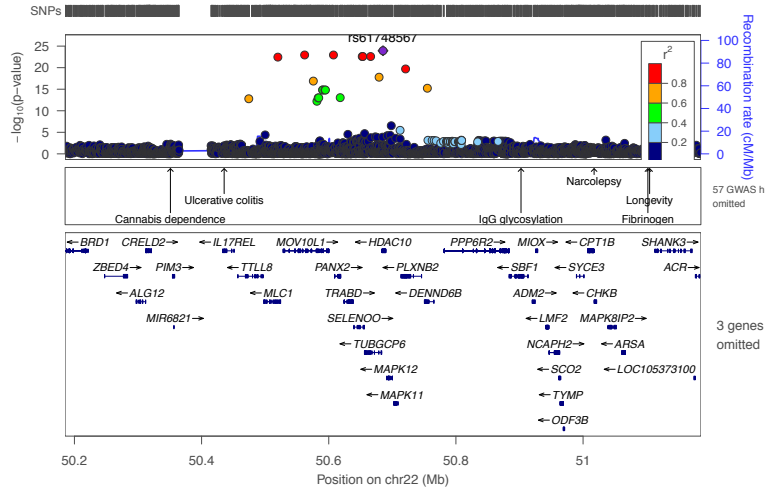

### glycine conjugate of C9H16O2\*

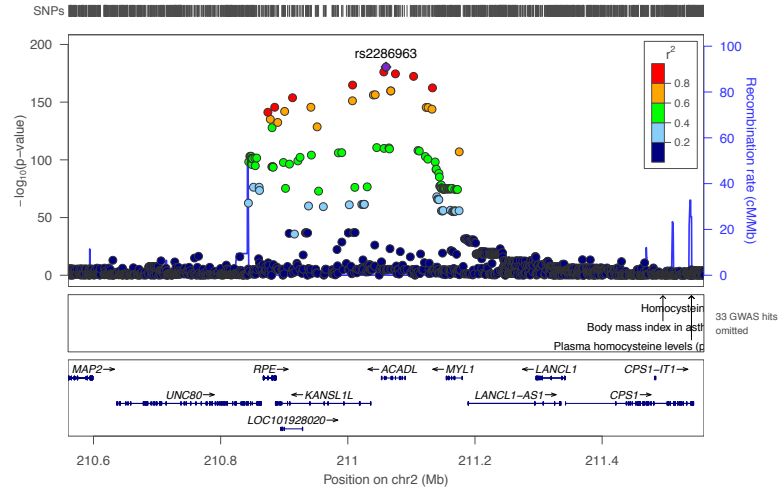

### gamma-CEHC sulfate\*

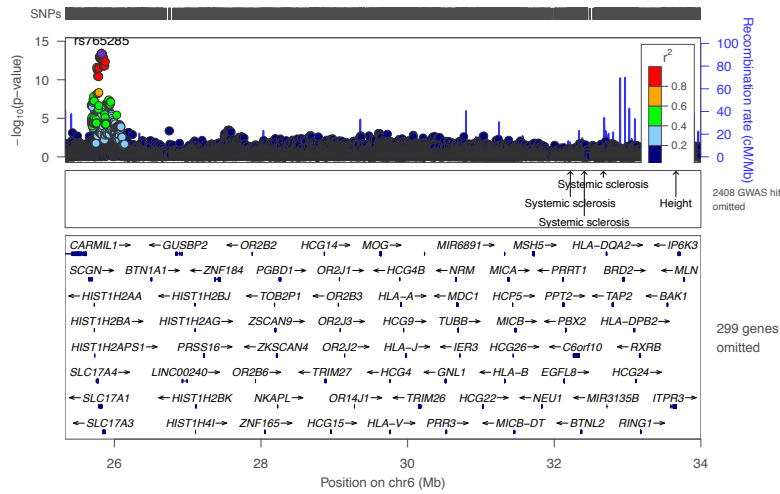

### phenylalanine

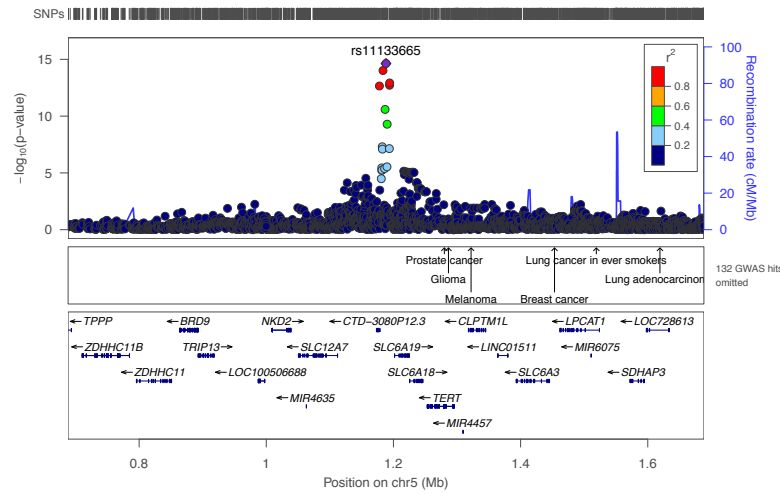

Supplement: NIHMS1615960-supplement-supplementary_information.pdf [file NIHMS1615960-supplement-supplementary_information.pdf]
